# Supplementary material for: Can P3S and C3S monolayers be used as anode materials in metal-ion batteries? An answer from first-principles study
Source: Royal Society of Chemistry journal article supplement (doi:10.1039/d3cp06014d), 2024-01-01
Supplement: d3cp06014d9.pdf [file d3cp06014d9.pdf]

# Supporting Information: Can P<sub>3</sub>S and C<sub>3</sub>S Monolayers be Used as Anode Materials in Metal-Ion Batteries? An Answer from First-Principles Study

Somnath Chowdhury<sup>1</sup>, Pranab Sarkar<sup>2</sup>, Bikash Chandra Gupta<sup>1\*</sup>

<sup>1</sup> Department of Physics, Visva-Bharati, Santiniketan, India, 731235

<sup>2</sup> Department of Chemistry, Visva-Bharati, Santiniketan, India, 731235

\* Corresponding author.

E-mail address: [bikashc.gupta@visva-bharati.ac.in](mailto:bikashc.gupta@visva-bharati.ac.in)

| Index                                                                                                                                                                                                                                                                                                                                                                                                                                                                               | Page    |
|-------------------------------------------------------------------------------------------------------------------------------------------------------------------------------------------------------------------------------------------------------------------------------------------------------------------------------------------------------------------------------------------------------------------------------------------------------------------------------------|---------|
| 1. Supporting Figures .....                                                                                                                                                                                                                                                                                                                                                                                                                                                         | S2-S9   |
| Figure S1. Electronic properties (Band structure and total density of states): pristine P <sub>3</sub> S and C <sub>3</sub> S monolayers. Fermi levels are set to zero. (PBE calculations)                                                                                                                                                                                                                                                                                          | S2      |
| Figure S2. Electronic properties (Band structure and total density of states): pristine (a,b) P <sub>3</sub> S and (c,d) C <sub>3</sub> S monolayers. Fermi levels are set to zero. (PBEsol calculations).                                                                                                                                                                                                                                                                          | S3      |
| Figure S3. Electronic properties (Band structure and total density of states) of the single alkali metal adsorbed P <sub>3</sub> S and C <sub>3</sub> S monolayers: (a-c) and (d-f) represent Li-, Na-, and K-adsorbed P <sub>3</sub> S and C <sub>3</sub> S systems, respectively. Fermi levels are set to zero.(PBEsol calculation)                                                                                                                                               | S4      |
| Figure S4. Phonon band structure and partial density of states for (3×3×1) pristine P <sub>3</sub> S and C <sub>3</sub> S monolayers.                                                                                                                                                                                                                                                                                                                                               | S5      |
| Figure S5. Relaxed structures of the single alkali metal (Li, Na, and K) adsorbed P <sub>3</sub> S and C <sub>3</sub> S monolayers at their most favored sites. [top and side view].                                                                                                                                                                                                                                                                                                | S6      |
| Figure S6. Optimized geometries of the (a) monolayer Li-adsorbed P <sub>3</sub> S, (b) bilayer Li-adsorbed P <sub>3</sub> S, (c) tetralayer Li-adsorbed P <sub>3</sub> S, (d) monolayer Na-adsorbed P <sub>3</sub> S, (e) bilayer Na-adsorbed P <sub>3</sub> S, (f) monolayer K-adsorbed P <sub>3</sub> S, and (g) bilayer K-adsorbed P <sub>3</sub> S composite systems [top and side view]                                                                                        | S7      |
| Figure S7. Optimized geometries of the (a) monolayer Li-adsorbed C <sub>3</sub> S, (b) bilayer Li-adsorbed C <sub>3</sub> S, (c) monolayer Na-adsorbed C <sub>3</sub> S, (d) bilayer Na-adsorbed C <sub>3</sub> S, (e) tetralayer Na-adsorbed C <sub>3</sub> S, (f) monolayer K-adsorbed C <sub>3</sub> S, (g) bilayer K-adsorbed C <sub>3</sub> S, (h) tetralayer K-adsorbed C <sub>3</sub> S, and (g) hexalayer K-adsorbed C <sub>3</sub> S composite systems [top and side view] | S8      |
| Figure S8. (a) Possible diffusion pathway of two K-atoms from one most favored T <sub>BH</sub> -site to another T <sub>BH</sub> -site simultaneously in C <sub>3</sub> S monolayer and (b) its corresponding energy profile diagram.                                                                                                                                                                                                                                                | S9      |
| 2. Supporting Tables .....                                                                                                                                                                                                                                                                                                                                                                                                                                                          | S10-S12 |
| Table S1. Structural information of pristine P <sub>3</sub> S and C <sub>3</sub> S monolayers.                                                                                                                                                                                                                                                                                                                                                                                      | S10     |
| Table S2. Adsorption energies ( $E_{ad}$ ) for the single alkali metal adsorbed P <sub>3</sub> S and C <sub>3</sub> S monolayers.                                                                                                                                                                                                                                                                                                                                                   | S10     |
| Table S3. Charge transfer (Bader charge analysis) from the alkali metals to the monolayers and diffusion barrier of the single alkali metal adsorbed P <sub>3</sub> S and C <sub>3</sub> S systems.                                                                                                                                                                                                                                                                                 | S11     |
| Table S4. Layer-by-layer adsorption energies ( $E_{ad}$ ), average open-circuit voltage (OCV), and maximum theoretical capacities (C) of the alkali metal adsorbed P <sub>3</sub> S and C <sub>3</sub> S systems.                                                                                                                                                                                                                                                                   | S11     |
| Table S5. Details of volume expansion calculation of alkali metal adsorbed P <sub>3</sub> S and C <sub>3</sub> S systems at their maximum adsorbed geometries                                                                                                                                                                                                                                                                                                                       | S12     |

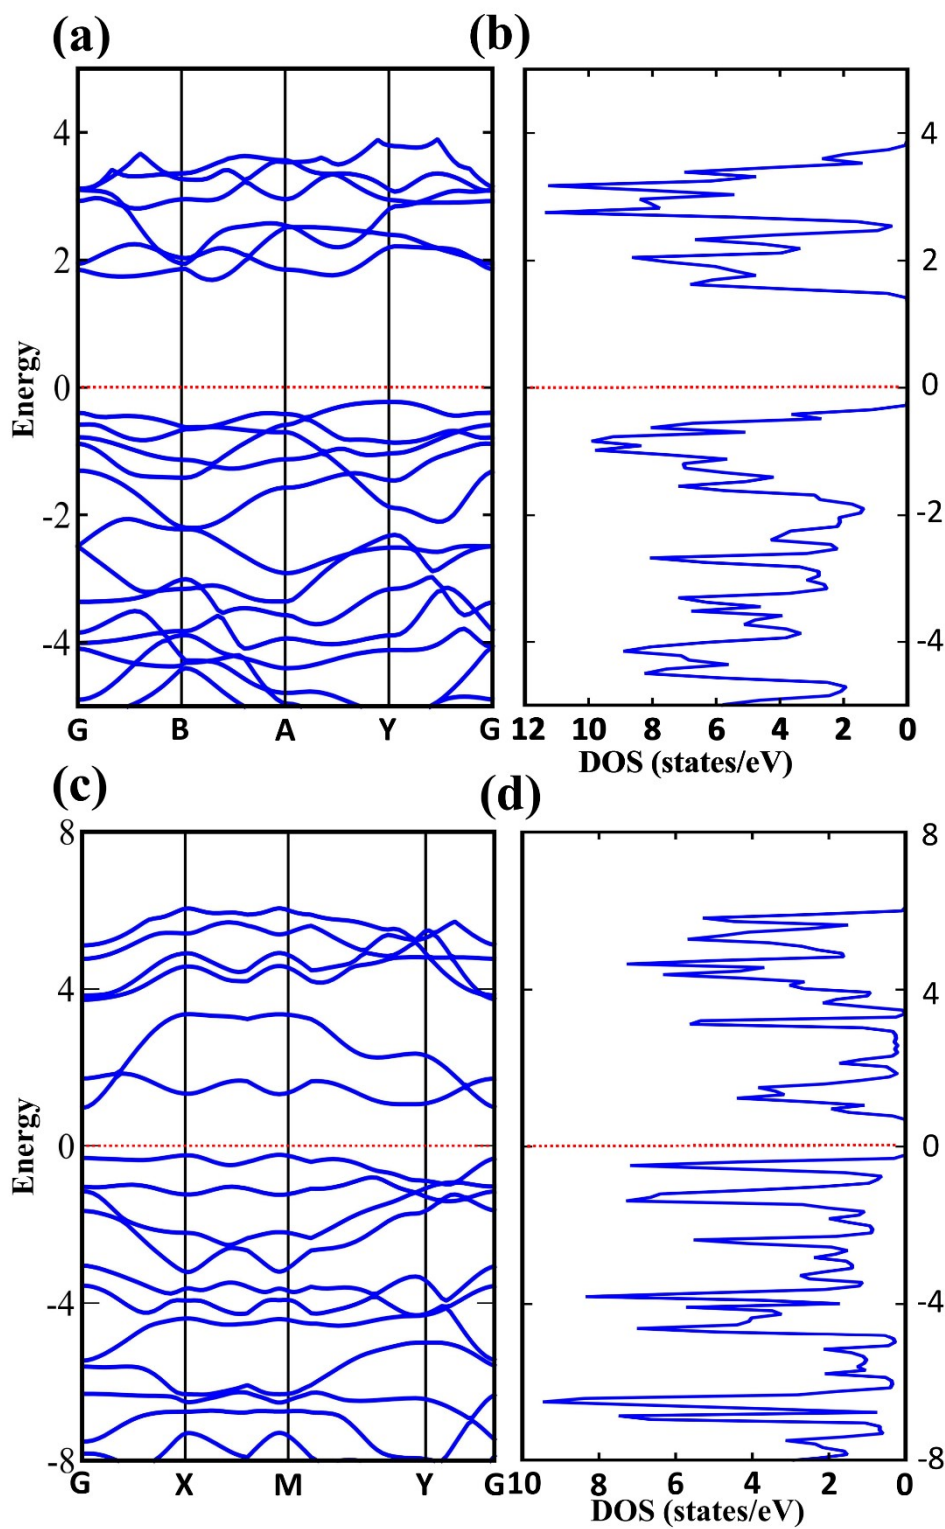

Figure S1. Electronic properties (Band structure and total density of states): pristine (a,b) P<sub>3</sub>S and (c,d) C<sub>3</sub>S monolayers. Fermi levels are set to zero. (PBE calculations).

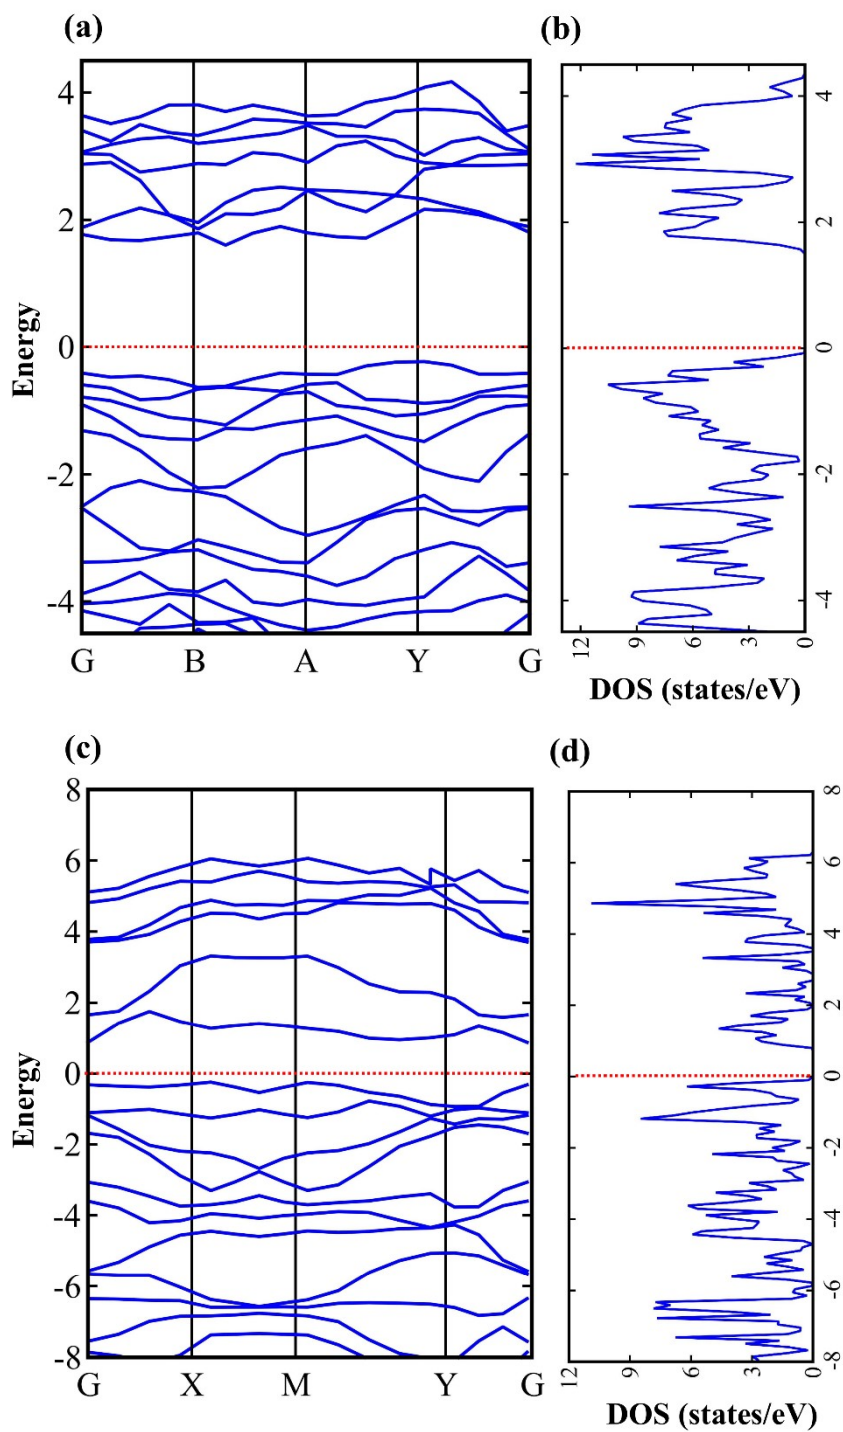

Figure S2. Electronic properties (Band structure and total density of states): pristine (a,b)  $P_3S$  and (c,d)  $C_3S$  monolayers. Fermi levels are set to zero. (PBEsol calculations).

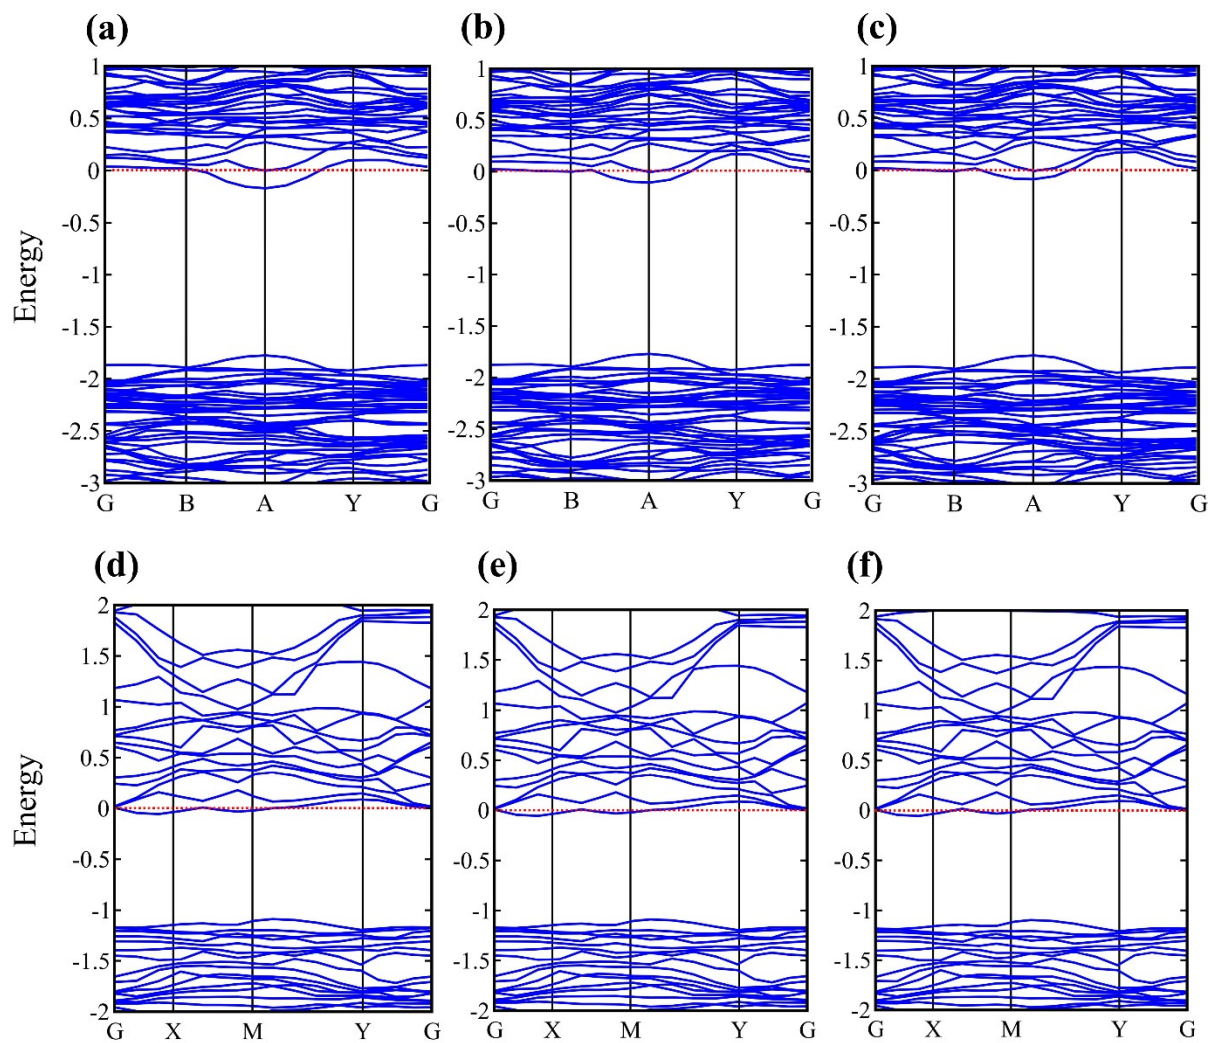

Figure S3. Electronic properties (Band structure and total density of states) of the single alkali metal adsorbed  $P_3S$  and  $C_3S$  monolayers: (a-c) and (d-f) represent Li-, Na-, and K-adsorbed  $P_3S$  and  $C_3S$  systems, respectively. Fermi levels are set to zero.

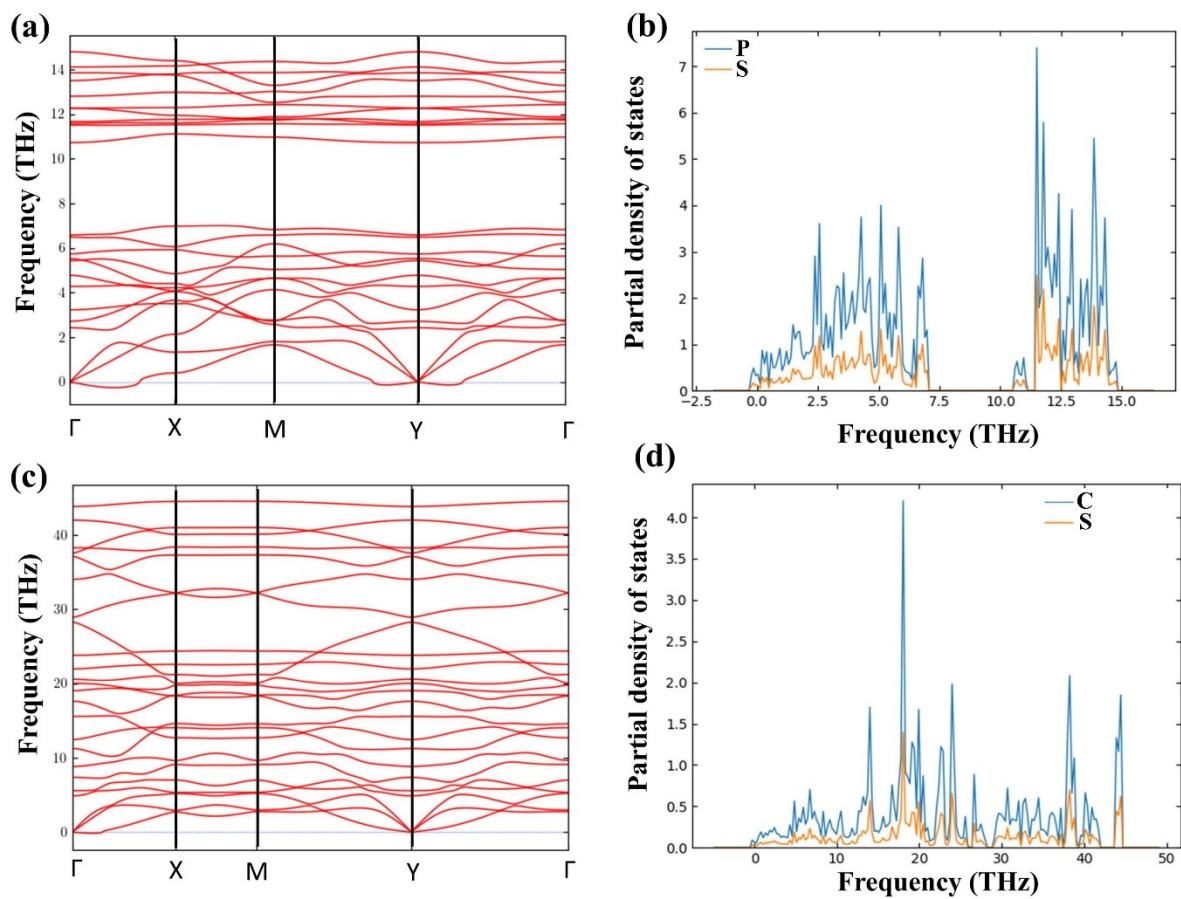

Figure S4. Phonon band structure and partial density of states for  $(3 \times 3 \times 1)$  pristine  $P_3S$  (a,b) and  $C_3S$  (c,d) monolayers, respectively.

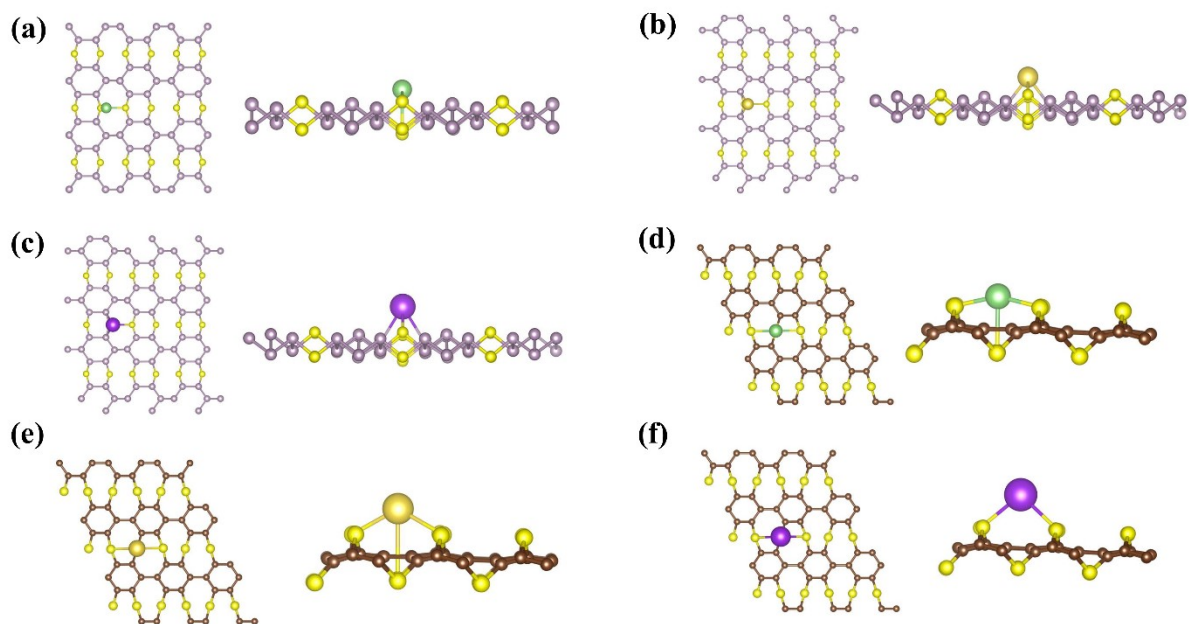

Figure S5. Relaxed structures of the single alkali metal adsorbed  $P_3S$  and  $C_3S$  monolayers at their most favored sites: (a-c) and (d-f) Li-, Na-, and K-adsorbed  $P_3S$  and  $C_3S$  systems, respectively [top and side view] (The violet, brown, yellow, green, golden yellow and purple balls represent P, C, S, Li, Na, and K atoms, respectively).

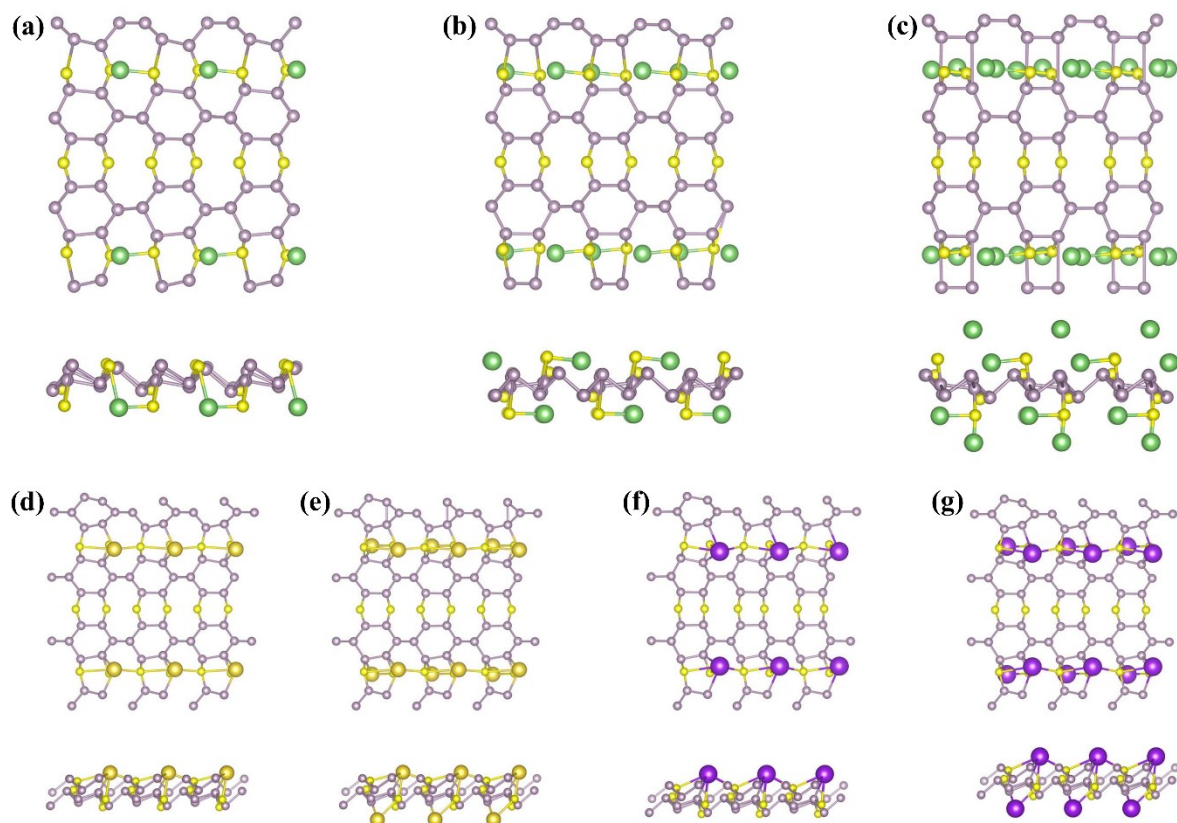

Figure S6. Optimized geometries of the (a) monolayer Li-adsorbed  $P_3S$ , (b) bilayer Li-adsorbed  $P_3S$ , (c) tetralayer Li-adsorbed  $P_3S$ , (d) monolayer Na-adsorbed  $P_3S$ , (e) bilayer Na-adsorbed  $P_3S$ , (f) monolayer K-adsorbed  $P_3S$ , and (g) bilayer K-adsorbed  $P_3S$  composite systems [top and side view] (The violet, yellow, green, golden yellow, and purple balls represent P, S, Li, Na, and K atoms, respectively).

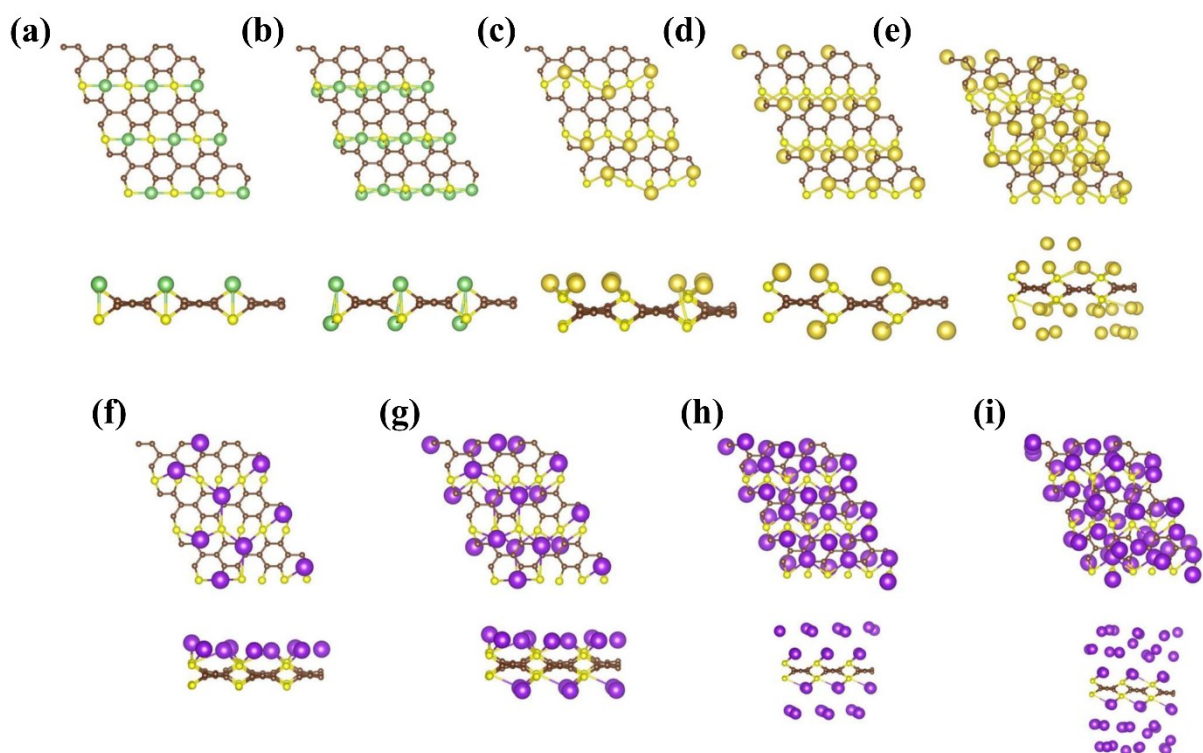

Figure S7. Optimized geometries of the (a) monolayer Li-adsorbed  $C_3S$ , (b) bilayer Li-adsorbed  $C_3S$ , (c) monolayer Na-adsorbed  $C_3S$ , (d) bilayer Na-adsorbed  $C_3S$ , (e) tetralayer Na-adsorbed  $C_3S$ , (f) monolayer K-adsorbed  $C_3S$ , (g) bilayer K-adsorbed  $C_3S$ , (h) tetralayer K-adsorbed  $C_3S$ , and (i) hexalayer K-adsorbed  $C_3S$  composite systems [top and side view] (The brown, yellow, green, golden yellow and purple balls represent C, S, Li, Na, and K atoms, respectively).



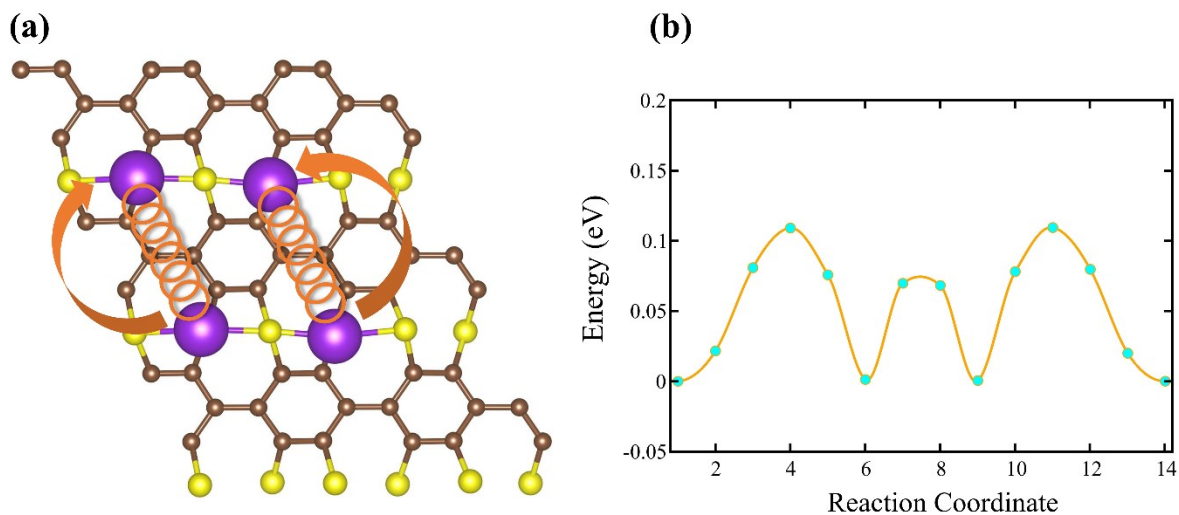

Figure S8. (a) Possible diffusion pathway of two K-atoms from one most favored  $T_{BH}$ -site to another  $T_{BH}$ -site simultaneously in  $C_3S$  monolayer and (b) its corresponding energy profile diagram.

Table S1. Structural information of pristine P<sub>3</sub>S and C<sub>3</sub>S monolayers.

| Monolayer        | Crystal Structure (Space Group) | Lattice Parameters (Å, °)                                    | Bond Lengths (Å)                       |
|------------------|---------------------------------|--------------------------------------------------------------|----------------------------------------|
| P <sub>3</sub> S | Monoclinic (P2/m)               | a = 6.04<br>b = 6.41<br>α = 91.63<br>β = 90.04<br>γ = 89.92  | P-P: 2.26<br>2.27<br>2.28<br>P-S: 2.16 |
| C <sub>3</sub> S | Triclinic (P1)                  | a = 4.44<br>b = 5.63<br>α = 90.23<br>β = 90.92<br>γ = 113.23 | C-C: 1.44<br>C-S: 1.78                 |

Table S2. Adsorption energies ( $E_{ad}$ ) for the single alkali metal adsorbed P<sub>3</sub>S and C<sub>3</sub>S monolayers.

| Monolayer        | Alkali Metal Atom | Adsorption Energy ( $E_{ad}$ ) (eV)                                                                                                                                                 | Most Favored Site |
|------------------|-------------------|-------------------------------------------------------------------------------------------------------------------------------------------------------------------------------------|-------------------|
| P <sub>3</sub> S | Li                | T <sub>P-S</sub> : -5.48, T <sub>P-P</sub> : -5.50, T <sub>P</sub> : -5.28, T <sub>S</sub> : -5.41, T <sub>hP</sub> : -5.28, T <sub>hPS</sub> : -5.49, and T <sub>BH</sub> : -5.52, | T <sub>BH</sub>   |
|                  | Na                | T <sub>P-S</sub> : -5.52, T <sub>P-P</sub> : -5.59, T <sub>P</sub> : -5.51, T <sub>S</sub> : -5.46, T <sub>hP</sub> : -5.53, T <sub>hPS</sub> : -5.55, and T <sub>BH</sub> : -5.62  | T <sub>BH</sub>   |
|                  | K                 | T <sub>P-S</sub> : -6.16, T <sub>P-P</sub> : -6.10, T <sub>P</sub> : -6.08, T <sub>S</sub> : -6.06, T <sub>hP</sub> : -6.10, T <sub>hPS</sub> : -6.11, and T <sub>BH</sub> : -6.18  | T <sub>BH</sub>   |
| C <sub>3</sub> S | Li                | T <sub>C-S</sub> : -4.96, T <sub>C-C</sub> : -4.82, T <sub>C</sub> : -4.89, T <sub>S</sub> : -5.02, T <sub>h</sub> : -4.88, T <sub>BH</sub> : -4.94                                 | T <sub>S</sub>    |
|                  | Na                | T <sub>C-S</sub> : -4.60, T <sub>C-C</sub> : -4.53, T <sub>C</sub> : -4.65, T <sub>S</sub> : -4.90, T <sub>h</sub> : -4.48, T <sub>BH</sub> : -4.76                                 | T <sub>S</sub>    |
|                  | K                 | T <sub>C-S</sub> : -5.27, T <sub>C-C</sub> : -5.19, T <sub>C</sub> : -5.17, T <sub>S</sub> : -5.35, T <sub>h</sub> : -5.29, T <sub>BH</sub> : -5.30                                 | T <sub>S</sub>    |

Table S3. Charge transfer (Bader charge analysis) from the alkali metals to the monolayers and diffusion barrier of the different pathways for the single alkali metal adsorbed P<sub>3</sub>S and C<sub>3</sub>S systems.

| Monolayer        | Alkali Metal Atom | Charge Transfer<br>(Bader Charge Analysis)<br>(e) | Diffusion Barrier<br>(eV) |                  |                 |
|------------------|-------------------|---------------------------------------------------|---------------------------|------------------|-----------------|
|                  |                   |                                                   | Path 1<br>(Green)         | Path 2<br>(Blue) | Path 3<br>(Red) |
| P <sub>3</sub> S | Li                | 0.86                                              | 0.74                      | 0.76             | 0.77            |
|                  | Na                | 0.84                                              | 0.26                      | 0.38             | 0.40            |
|                  | K                 | 0.87                                              | 0.57                      | 1.12             | 1.27            |
| C <sub>3</sub> S | Li                | 0.86                                              | 0.68                      | 0.75             | -               |
|                  | Na                | 0.84                                              | 0.30                      | 0.74             | -               |
|                  | K                 | 0.88                                              | 0.06                      | 0.08             | -               |

Table S4. Layer-by-layer adsorption energies ( $E_{ad}$ ), average open-circuit voltage (OCV), and maximum theoretical capacities (C) of the alkali metal adsorbed P<sub>3</sub>S and C<sub>3</sub>S systems.

| Monolayer        | Alkali Metal Atom | Layer-by-layer adsorption energies ( $E_{ad}$ ) (eV)                                                                | Average Open-Circuit Voltage (OCV) (V) | Maximum Theoretical Capacities (C) (mAh/g) |
|------------------|-------------------|---------------------------------------------------------------------------------------------------------------------|----------------------------------------|--------------------------------------------|
| P <sub>3</sub> S | Li                | Monolayer: -2.07<br>Bilayer: -1.30<br>Trilayer: -1.26<br>Tetralayer: -0.88                                          | 1.38                                   | 285.97                                     |
|                  | Na                | Monolayer: -1.90<br>Bilayer: -1.70                                                                                  | 1.80                                   | 142.98                                     |
|                  | K                 | Monolayer: -2.28<br>Bilayer: -2.26                                                                                  | 2.27                                   | 142.98                                     |
| C <sub>3</sub> S | Li                | Monolayer: -1.14<br>Bilayer: -0.83                                                                                  | 0.99                                   | 394.26                                     |
|                  | Na                | Monolayer: -0.89<br>Bilayer: -0.31<br>Trilayer: -0.20<br>Tetralayer: -0.08                                          | 0.37                                   | 788.53                                     |
|                  | K                 | Monolayer: -1.16<br>Bilayer: -0.85<br>Trilayer: -0.30<br>Tetralayer: -0.28<br>Pentalayer: -0.16<br>Hexalayer: -0.09 | 0.48                                   | 1182.79                                    |



Table S5. Details of volume expansion calculation of alkali metal adsorbed P<sub>3</sub>S and C<sub>3</sub>S systems at their maximum adsorbed geometries.

| <b>Monolayer</b> | <b>Alkali Metal Atom</b> | <b>Maximum Adsorbed Geometry</b> | <b>Old Volume (Å<sup>3</sup>)</b> | <b>New Volume (Å<sup>3</sup>)</b> | <b>Volume expansion (%)</b> |
|------------------|--------------------------|----------------------------------|-----------------------------------|-----------------------------------|-----------------------------|
| P <sub>3</sub> S | Li                       | Tetralayer                       | 6976.424                          | 7235.892                          | 0.037                       |
|                  | Na                       | Bilayer                          | 6976.424                          | 9281.76                           | 0.33                        |
|                  | K                        | Bilayer                          | 6976.424                          | 9842.94                           | 0.41                        |
| C <sub>3</sub> S | Li                       | Bilayer                          | 4510.872                          | 4624.48                           | 0.025                       |
|                  | Na                       | Tetralayer                       | 4510.872                          | 4530.288                          | 0.004                       |
|                  | K                        | Hexalayer                        | 4510.872                          | 4537.937                          | 0.006                       |
