# Supplementary figures and images for: Can P3S and C3S monolayers be used as anode materials in metal-ion batteries? An answer from first-principles study
Source: Royal Society of Chemistry journal article supplement (doi:10.1039/d3cp06014d), 2024-01-01

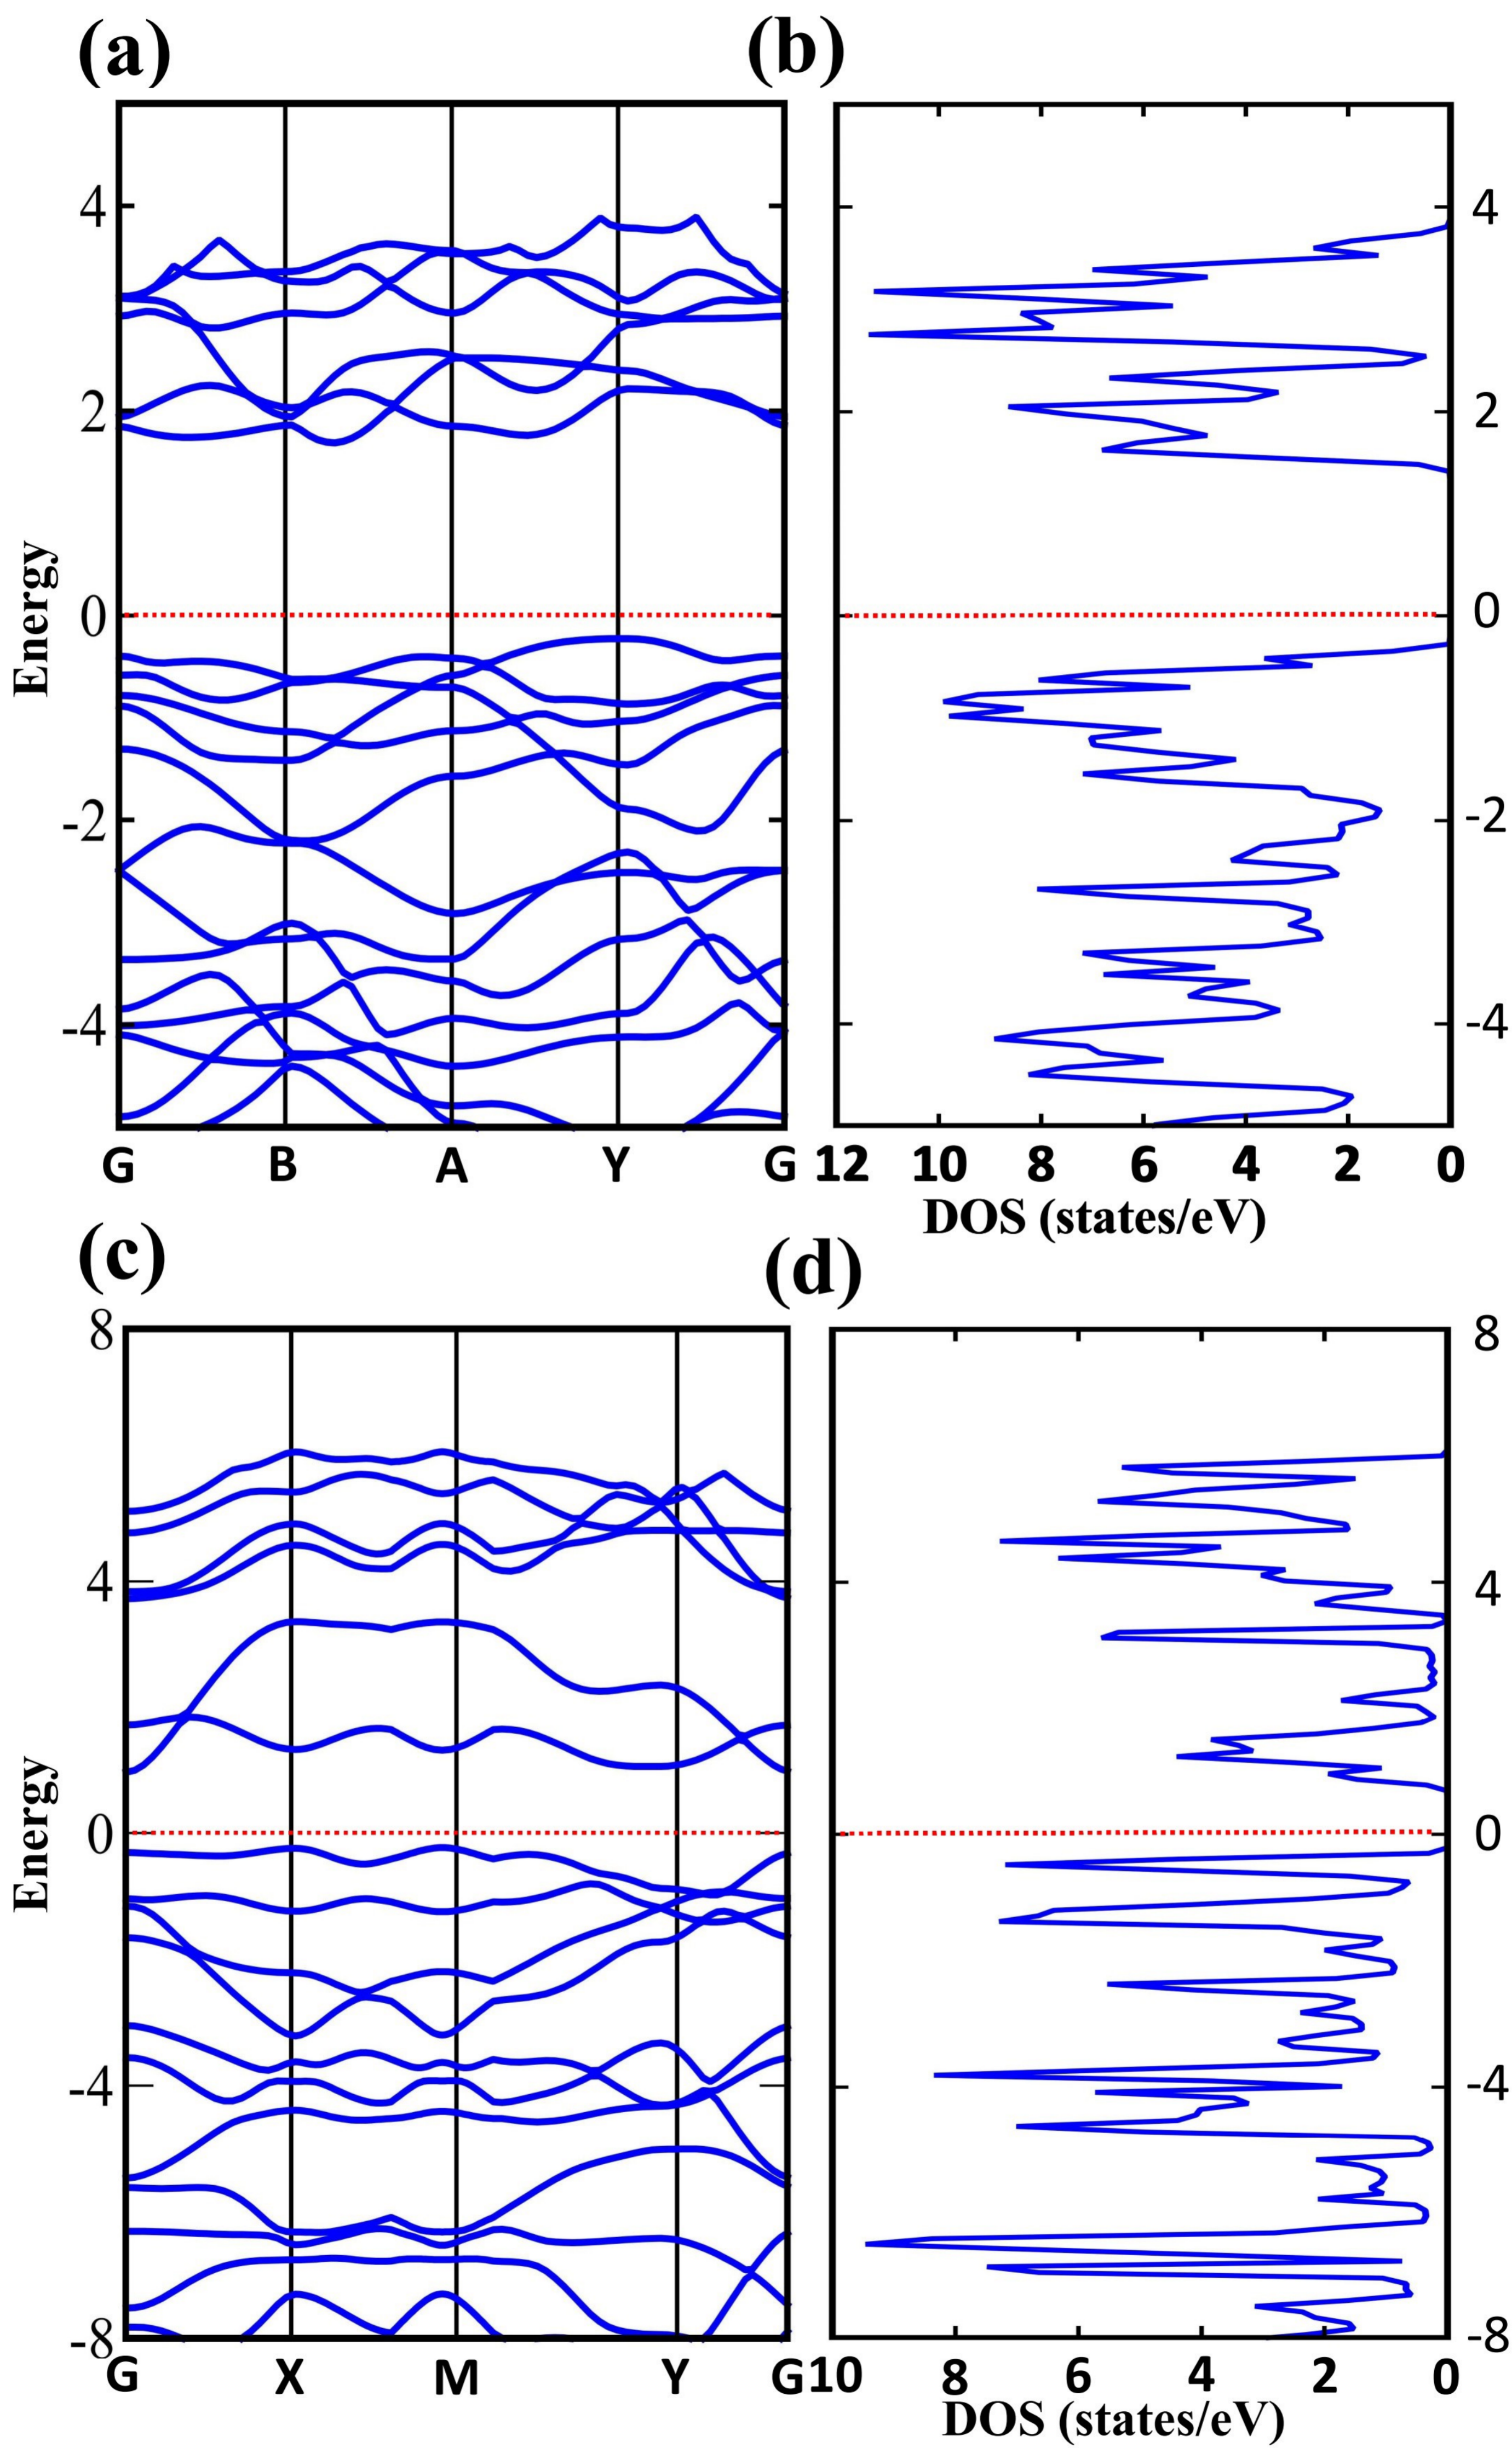

Supplement: d3cp06014d1.pdf [file d3cp06014d1.pdf]

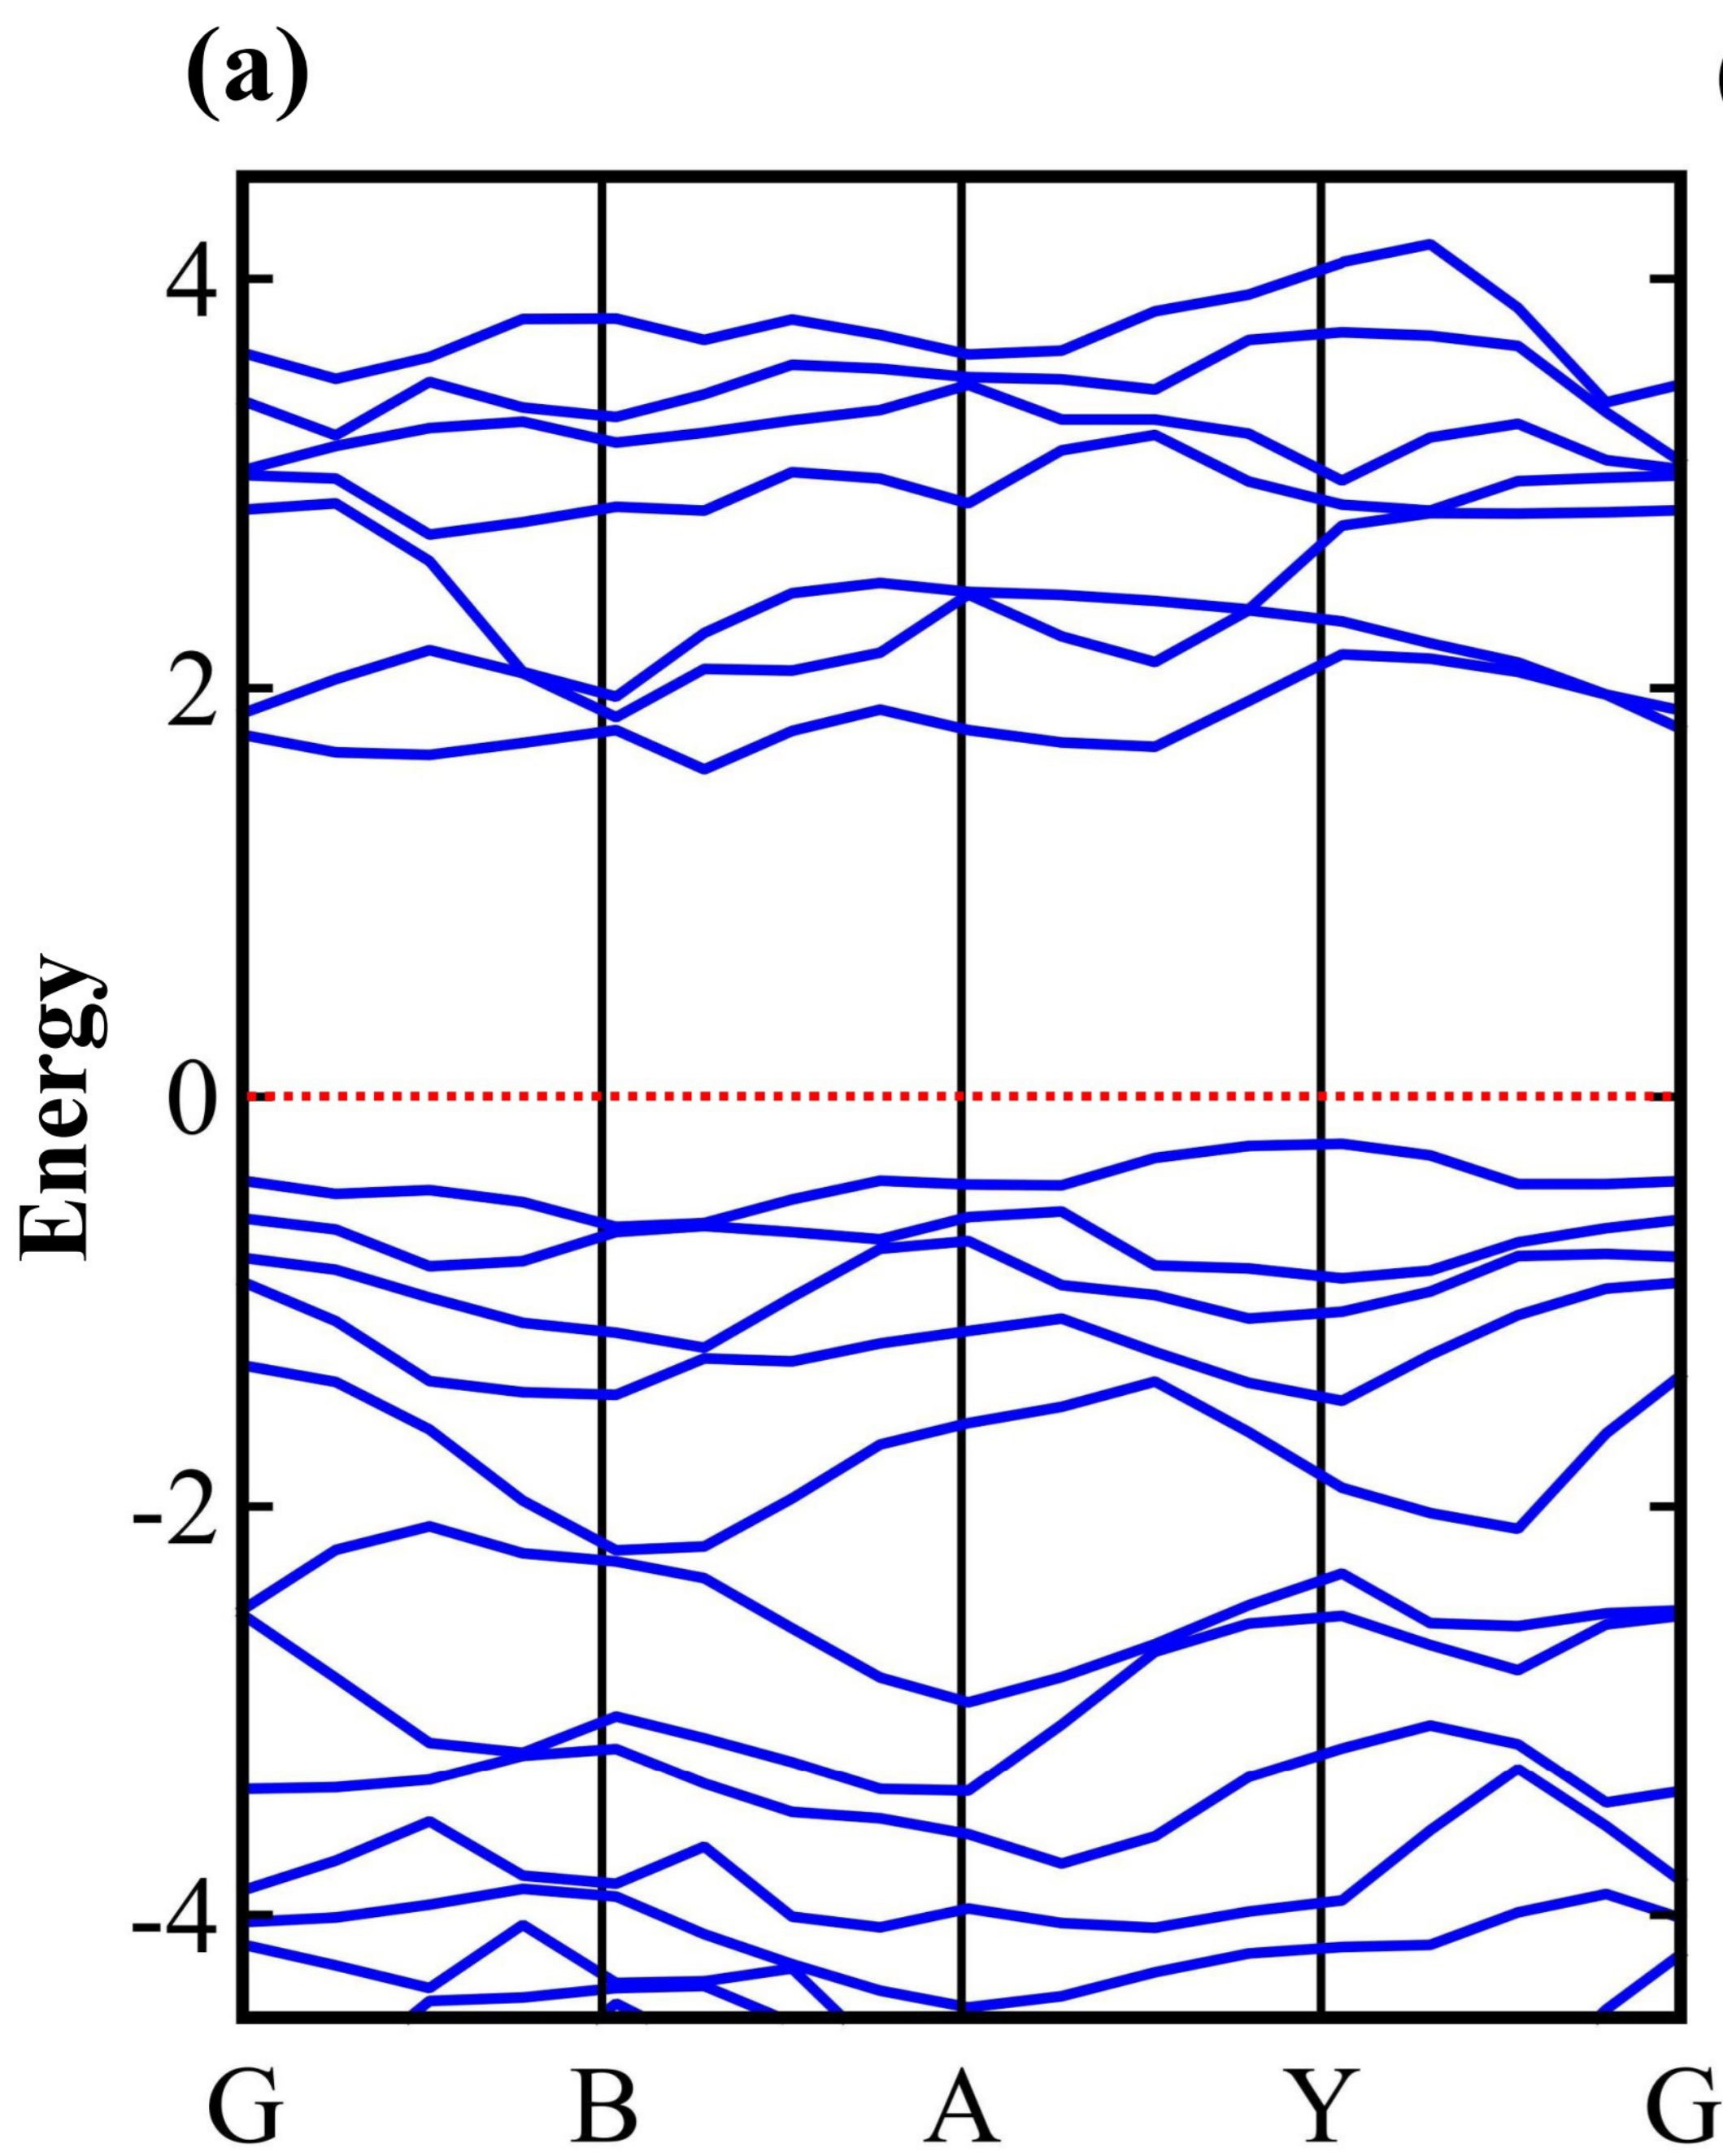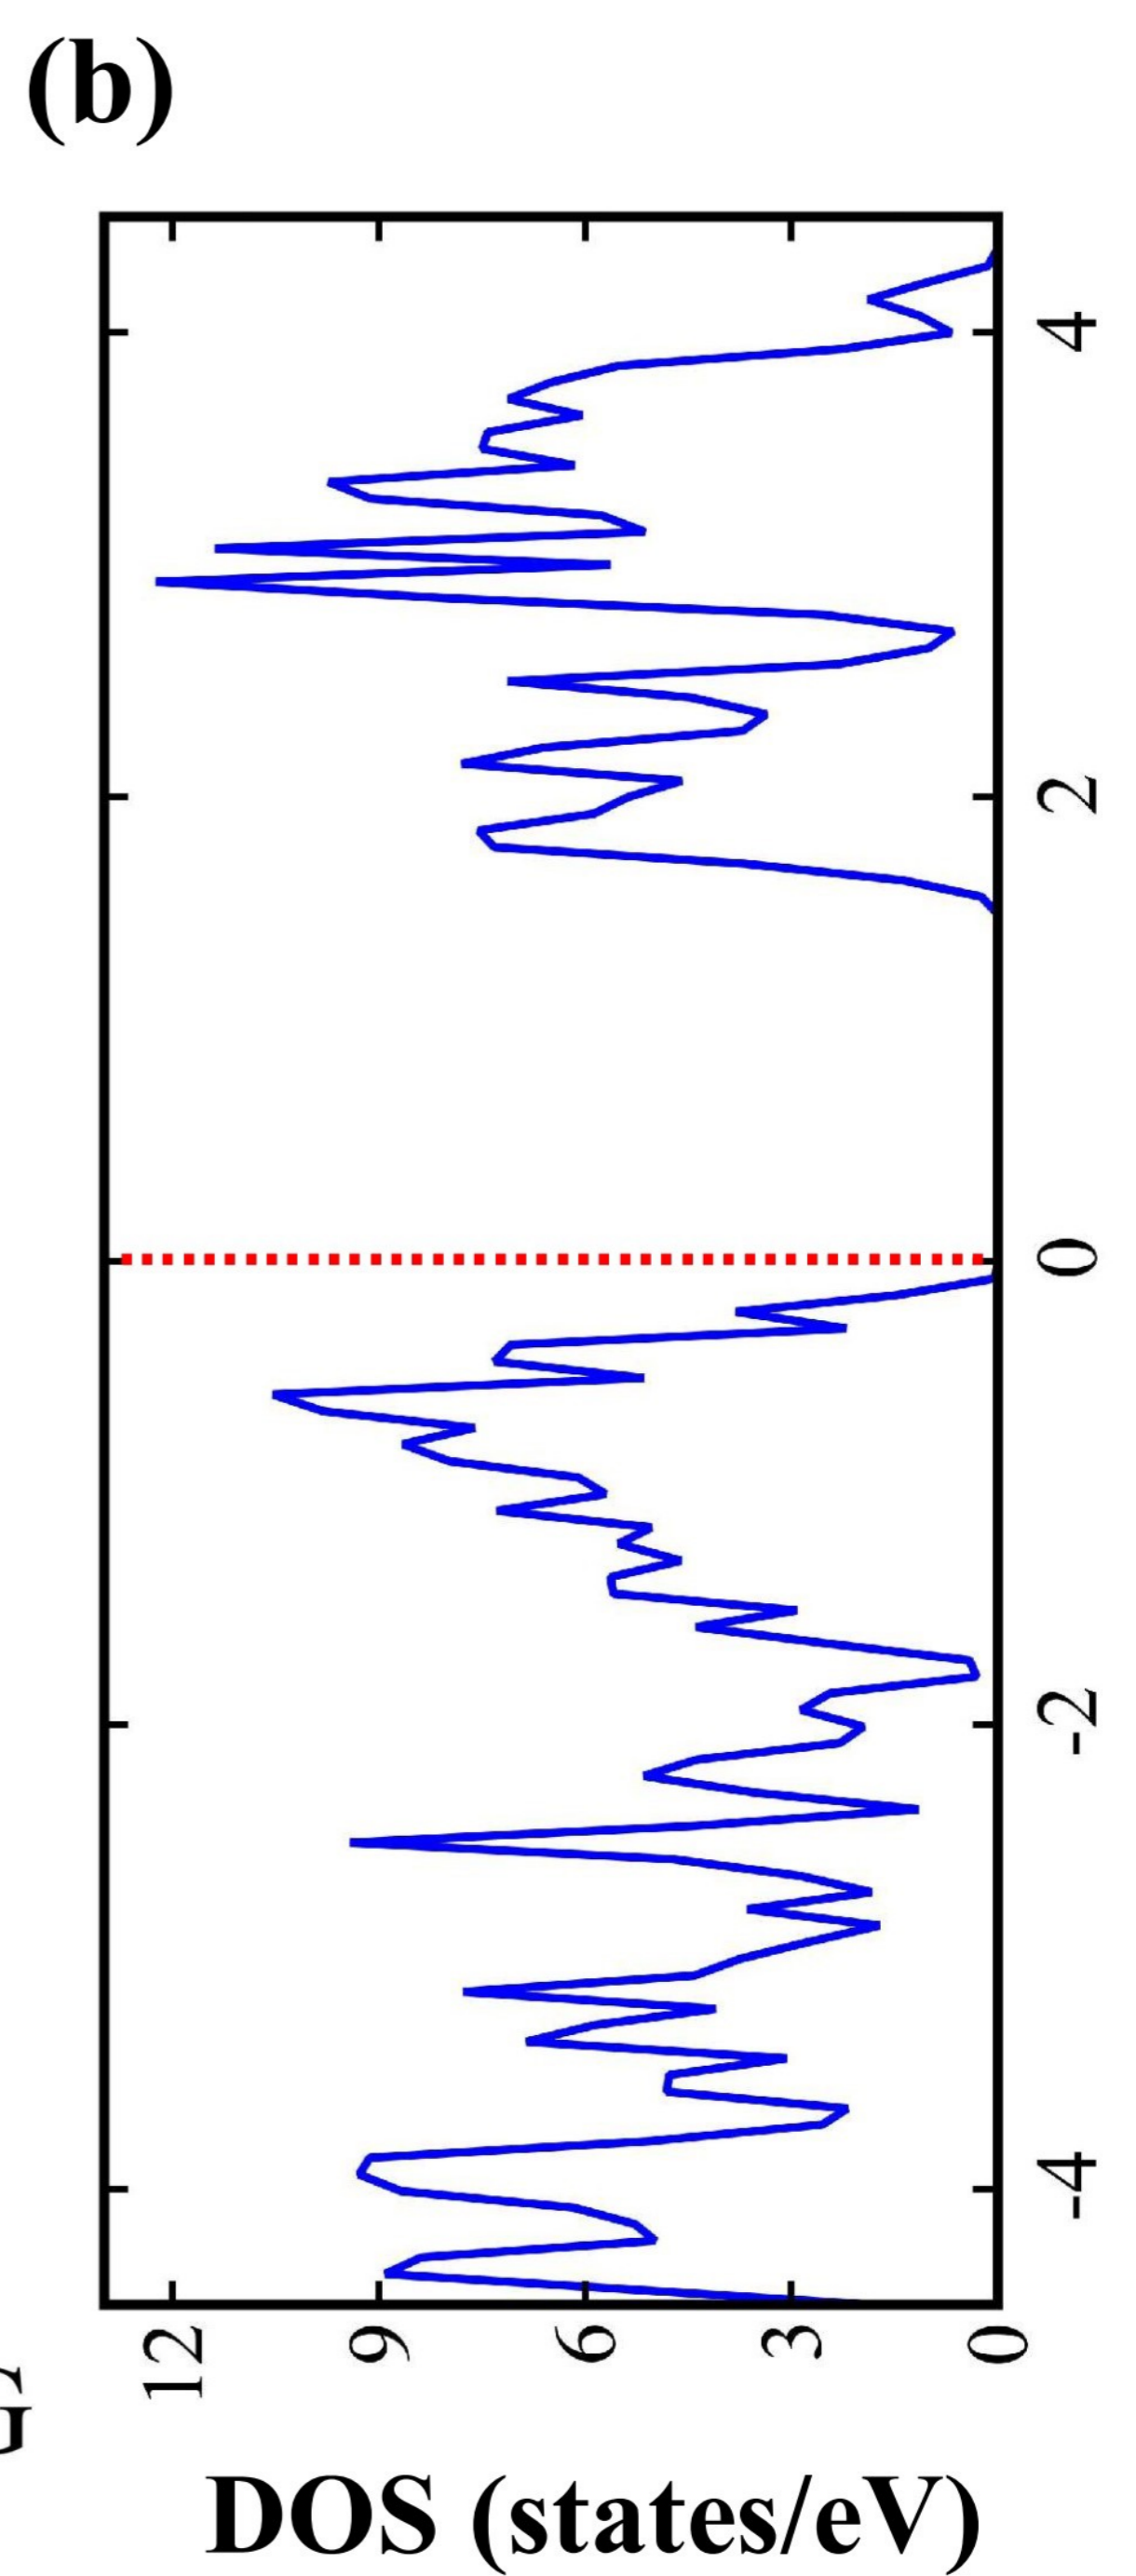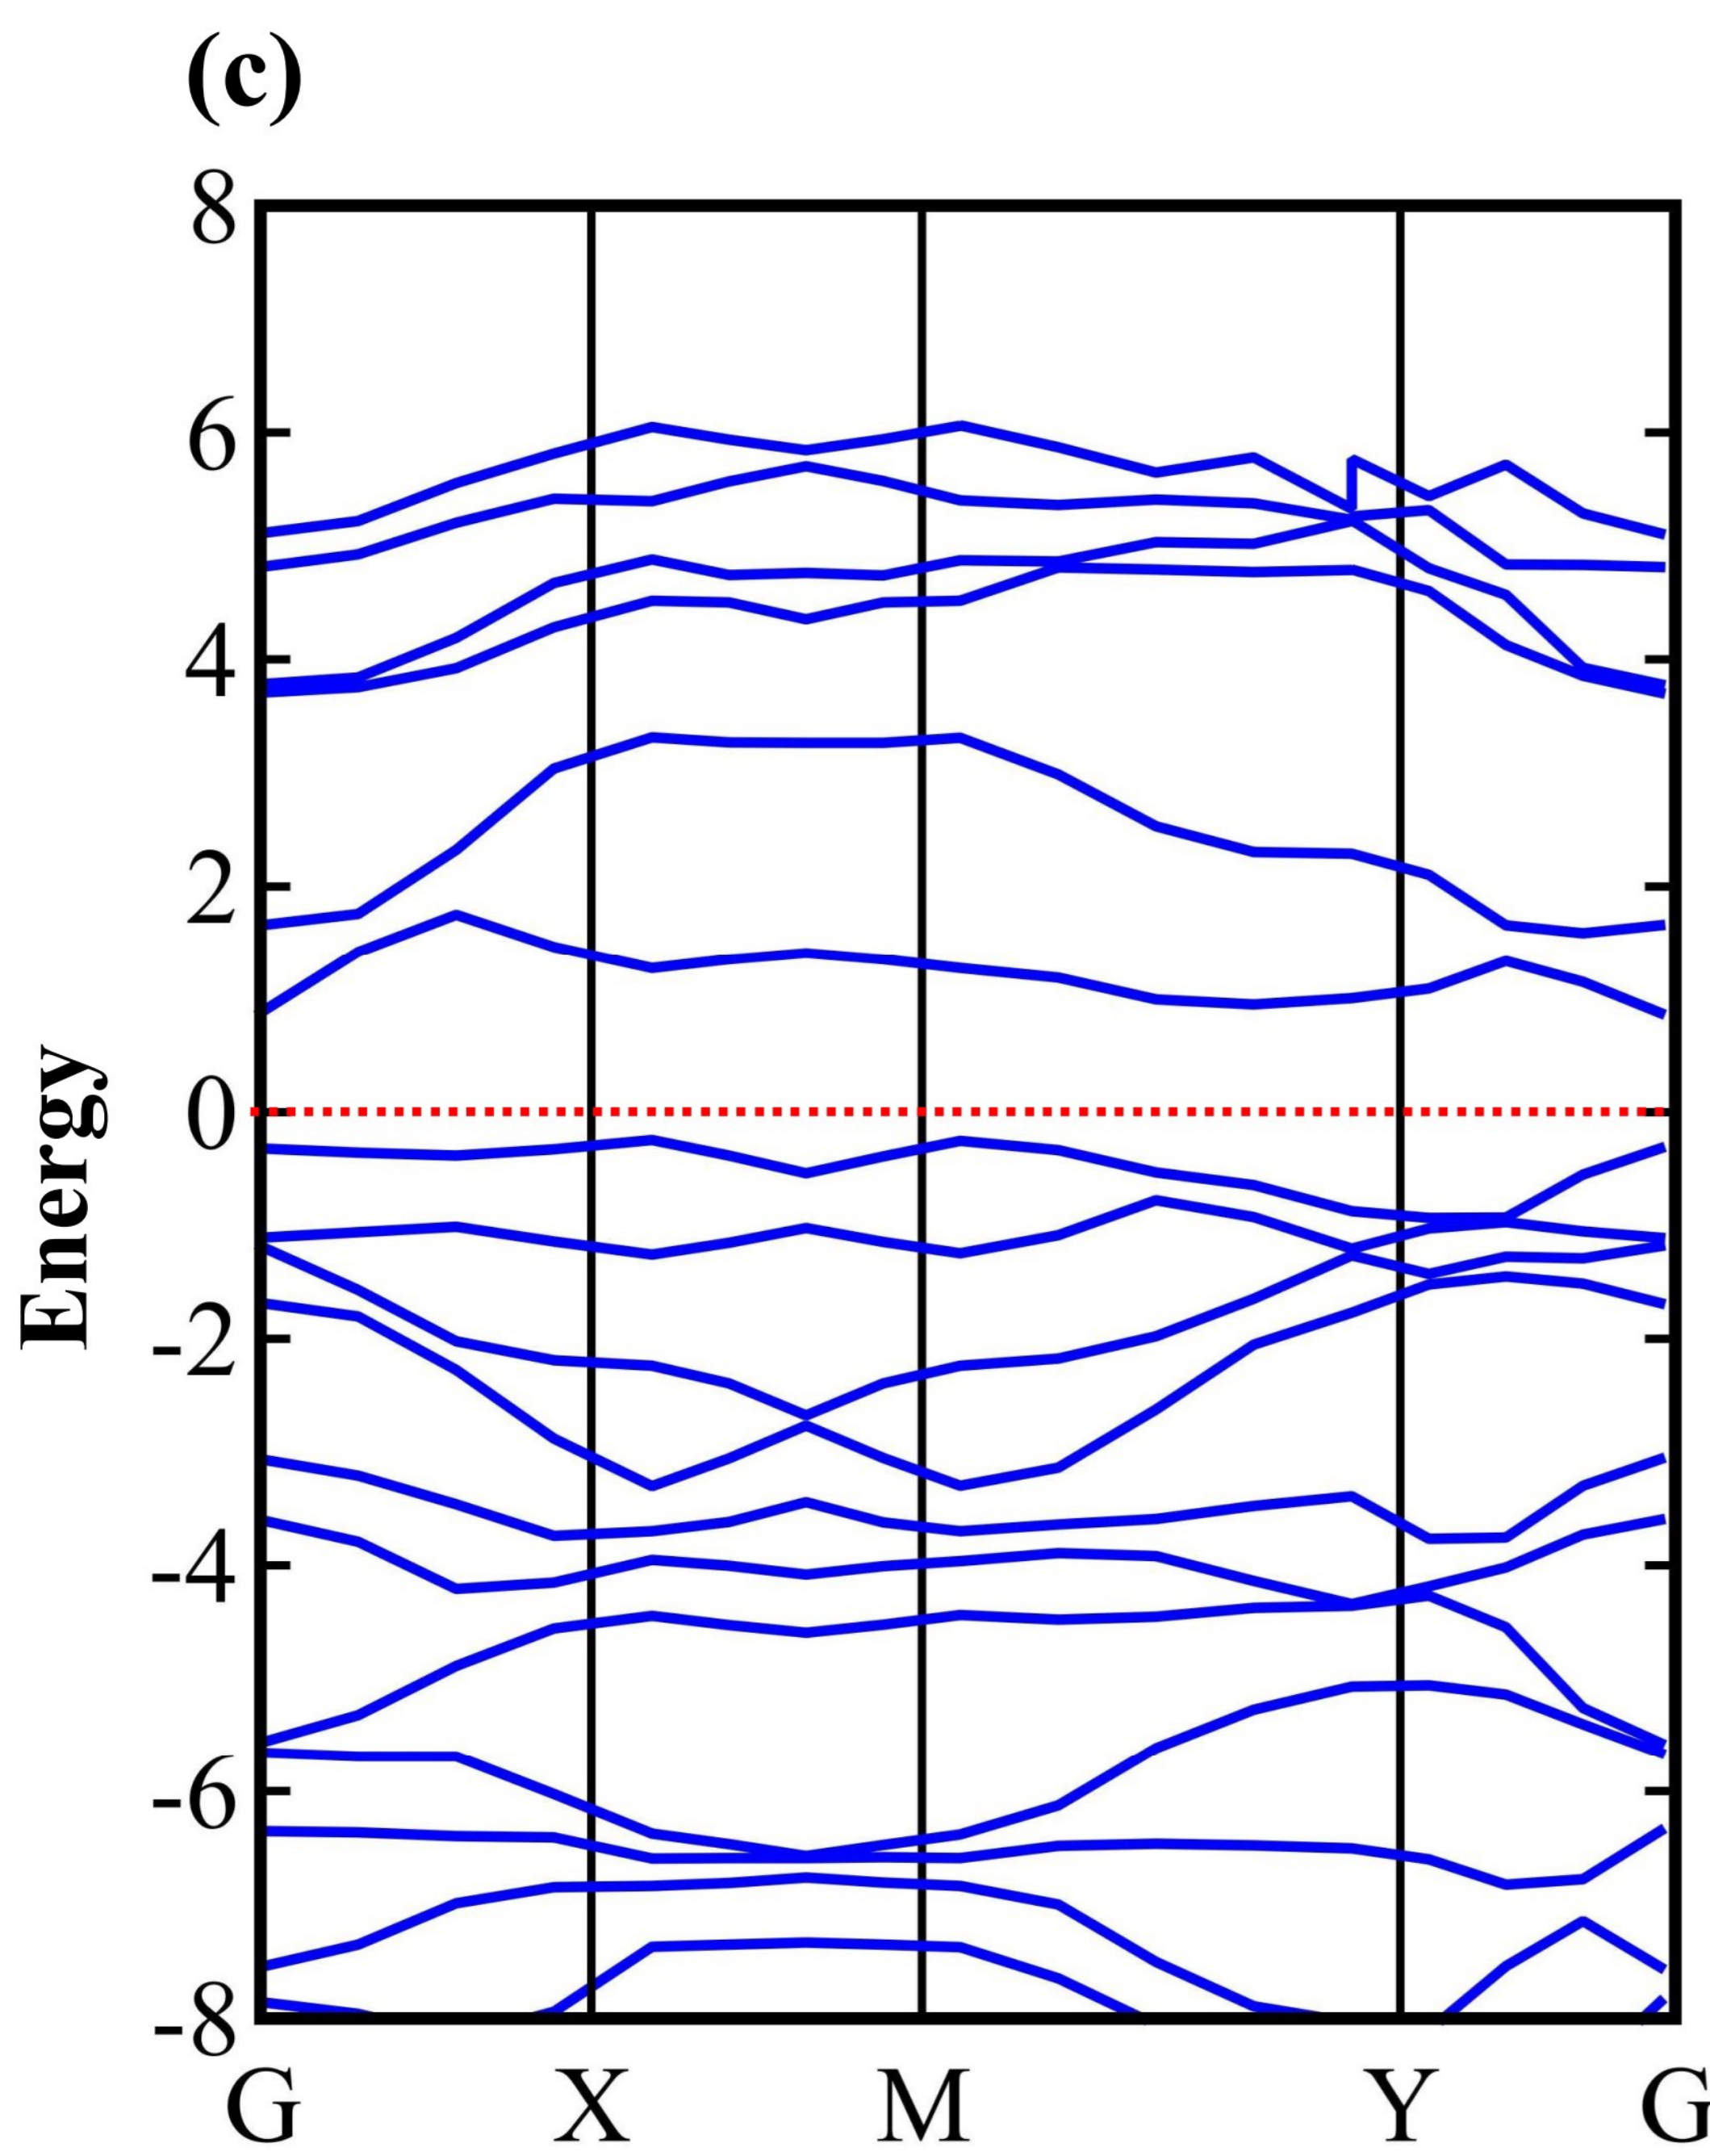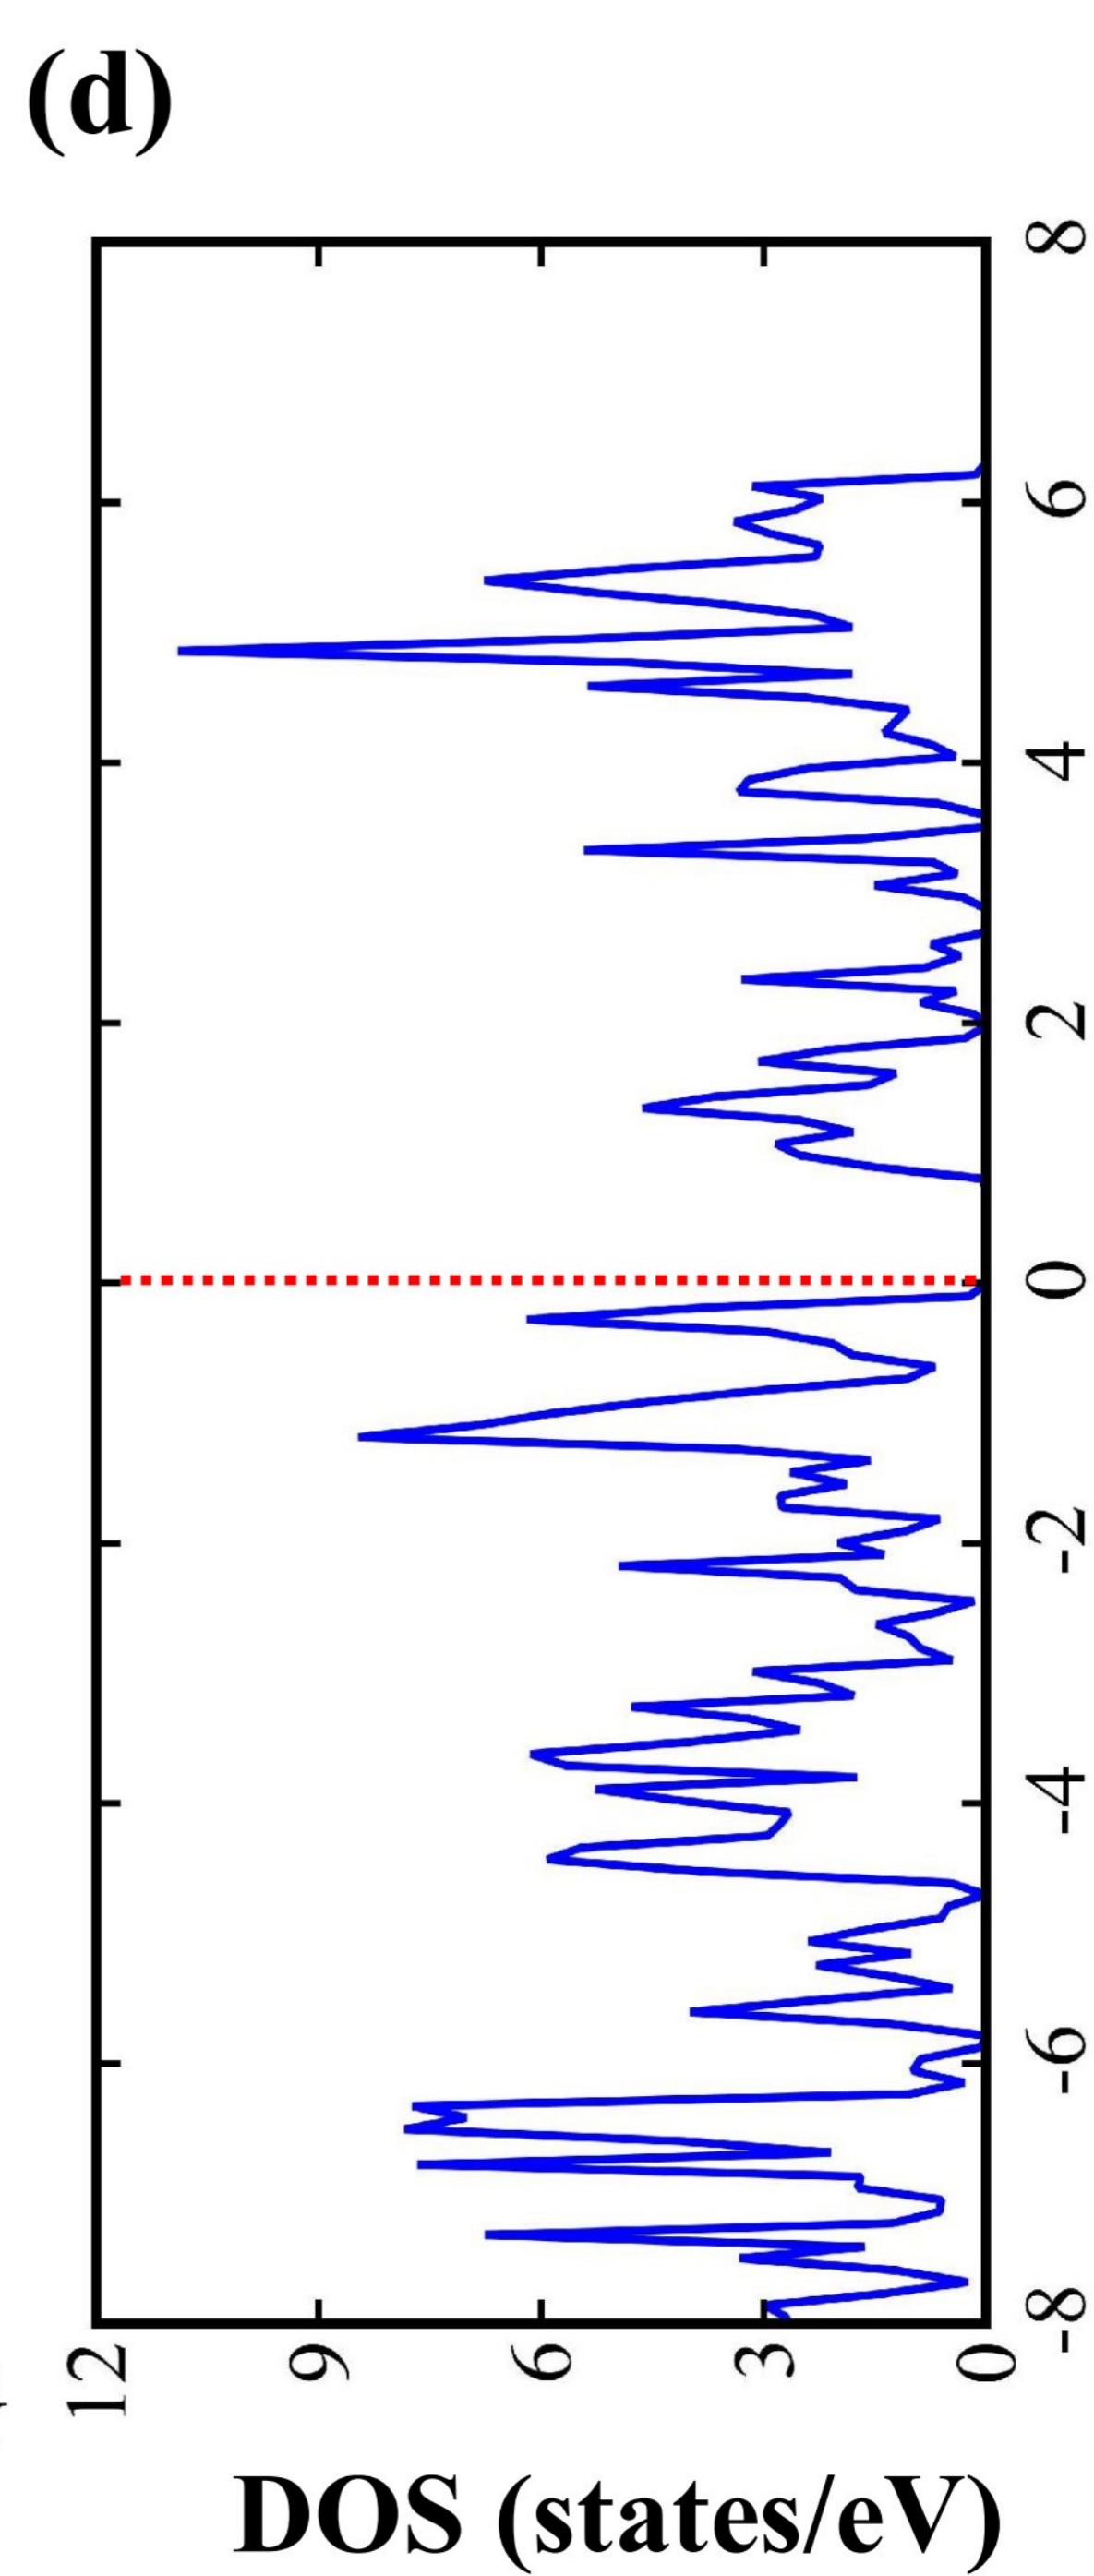

Supplement: d3cp06014d2.pdf [file d3cp06014d2.pdf]

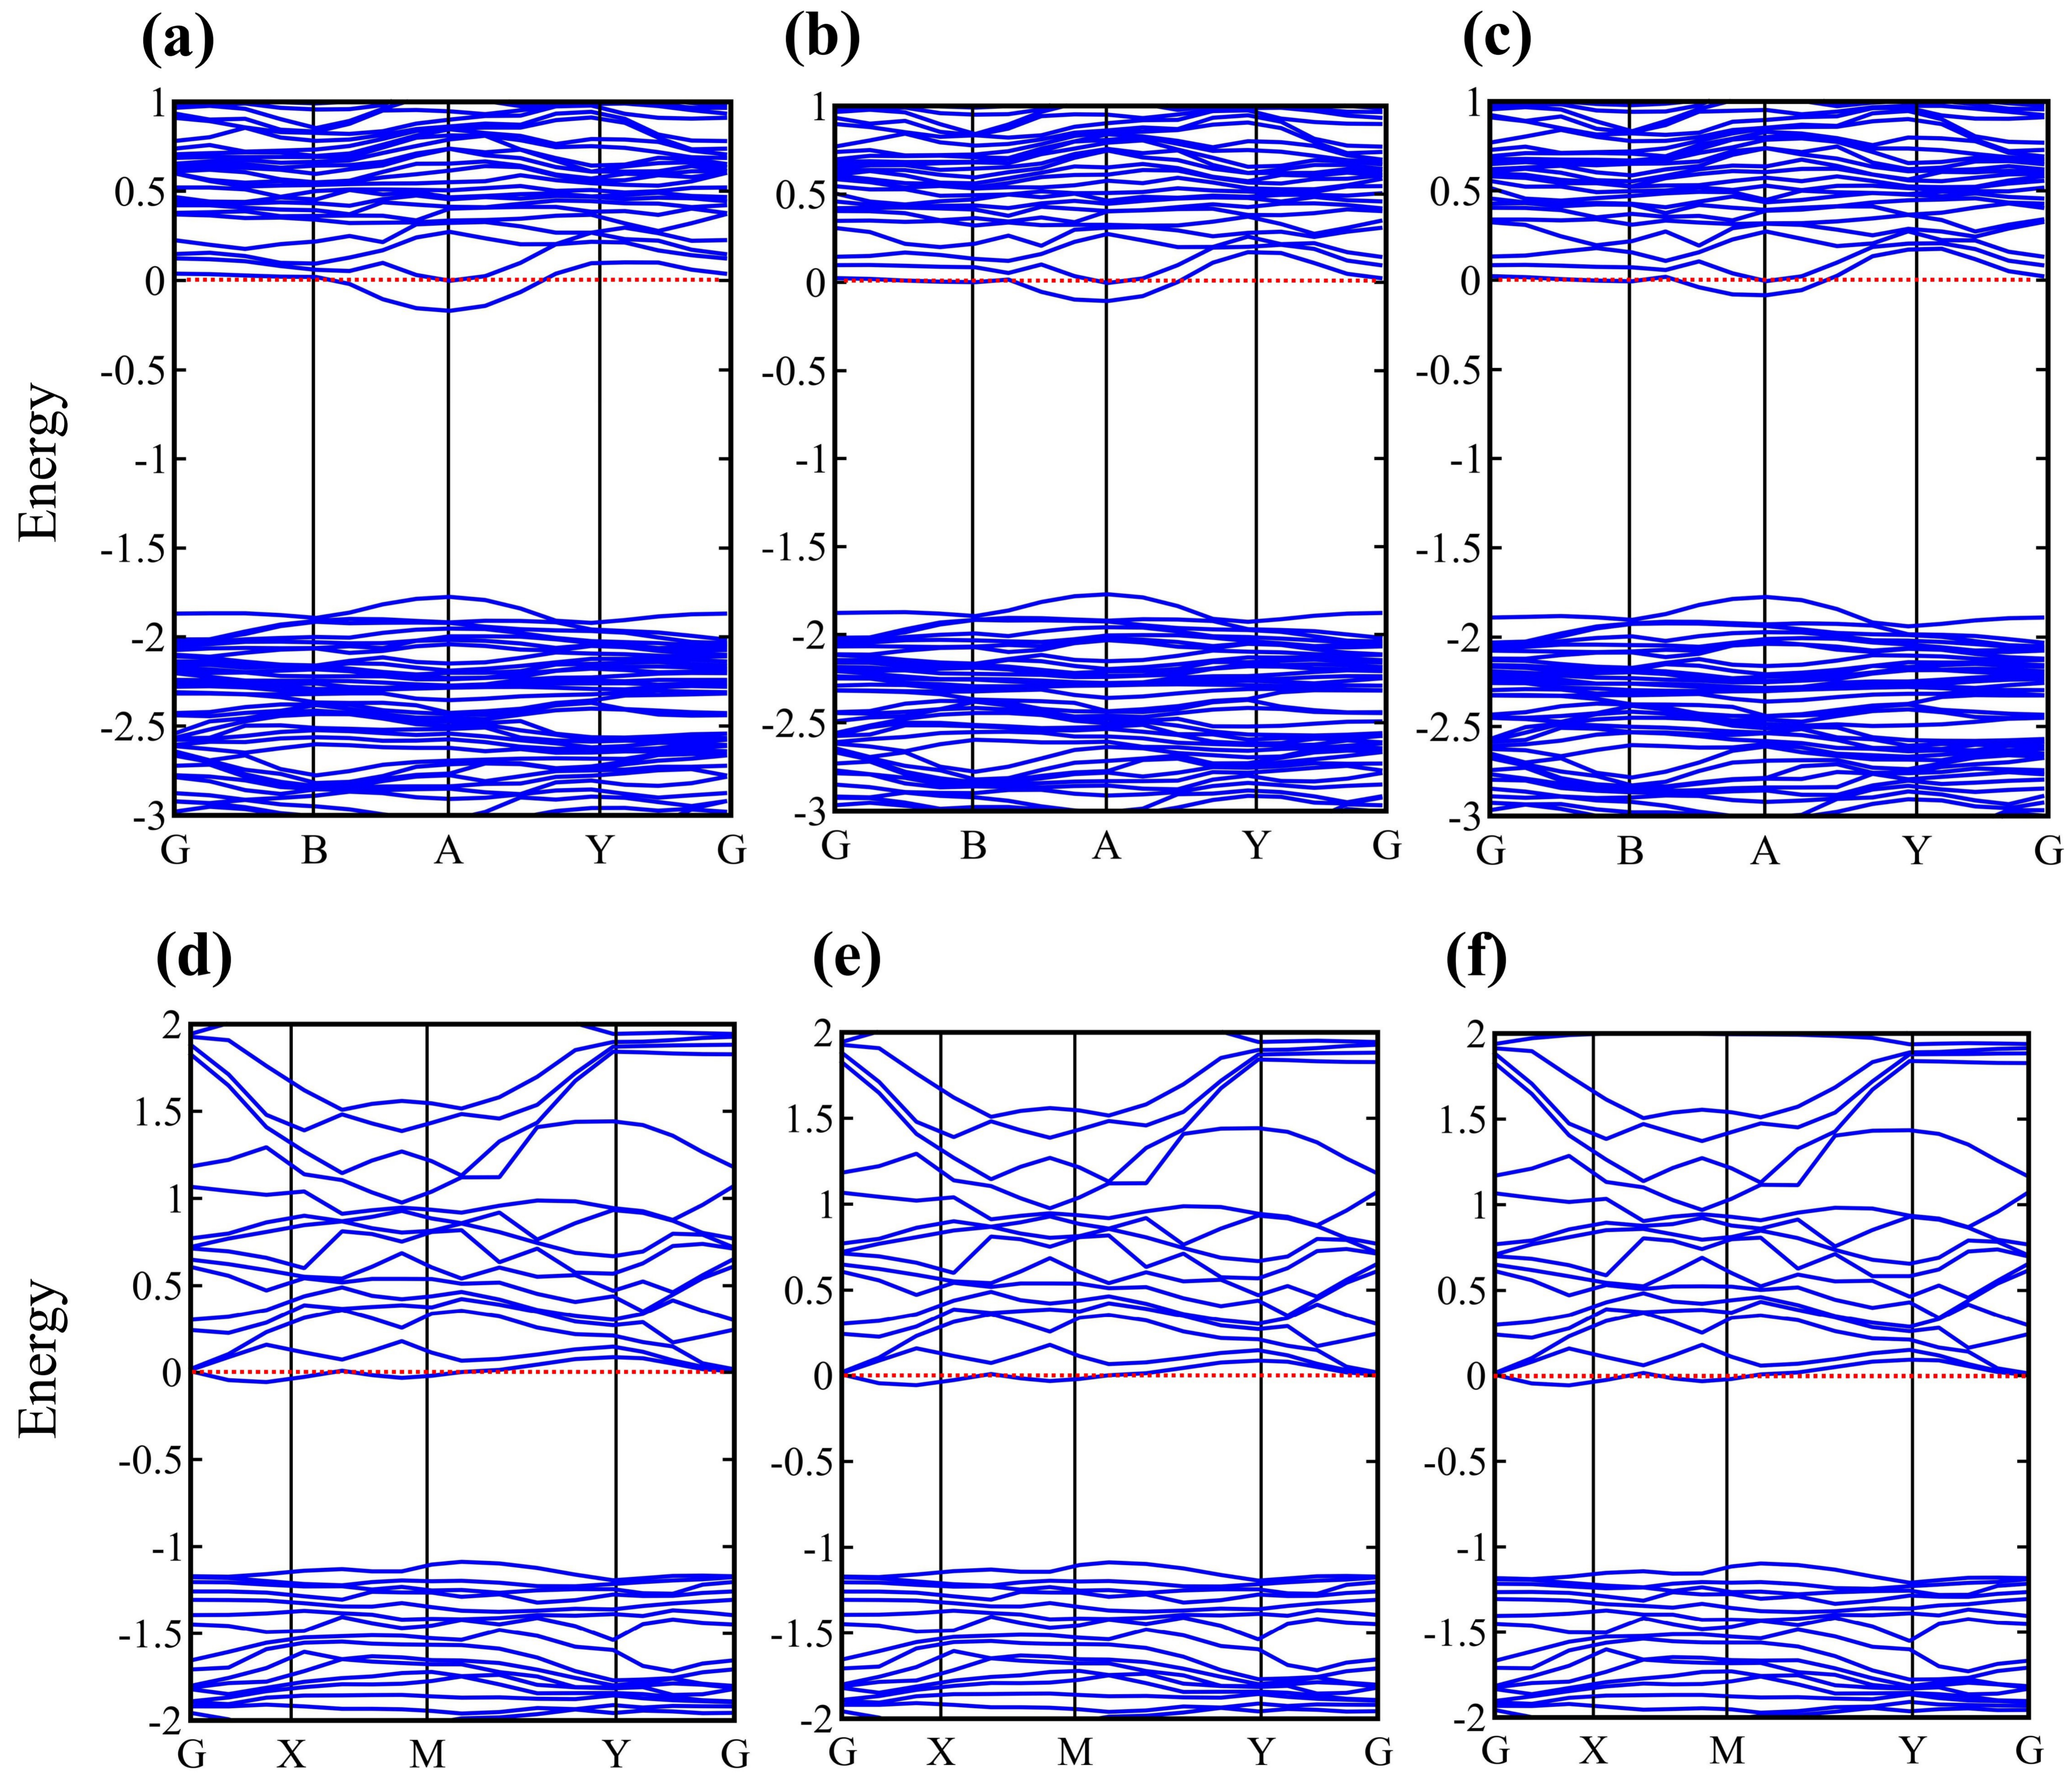

Supplement: d3cp06014d3.pdf [file d3cp06014d3.pdf]

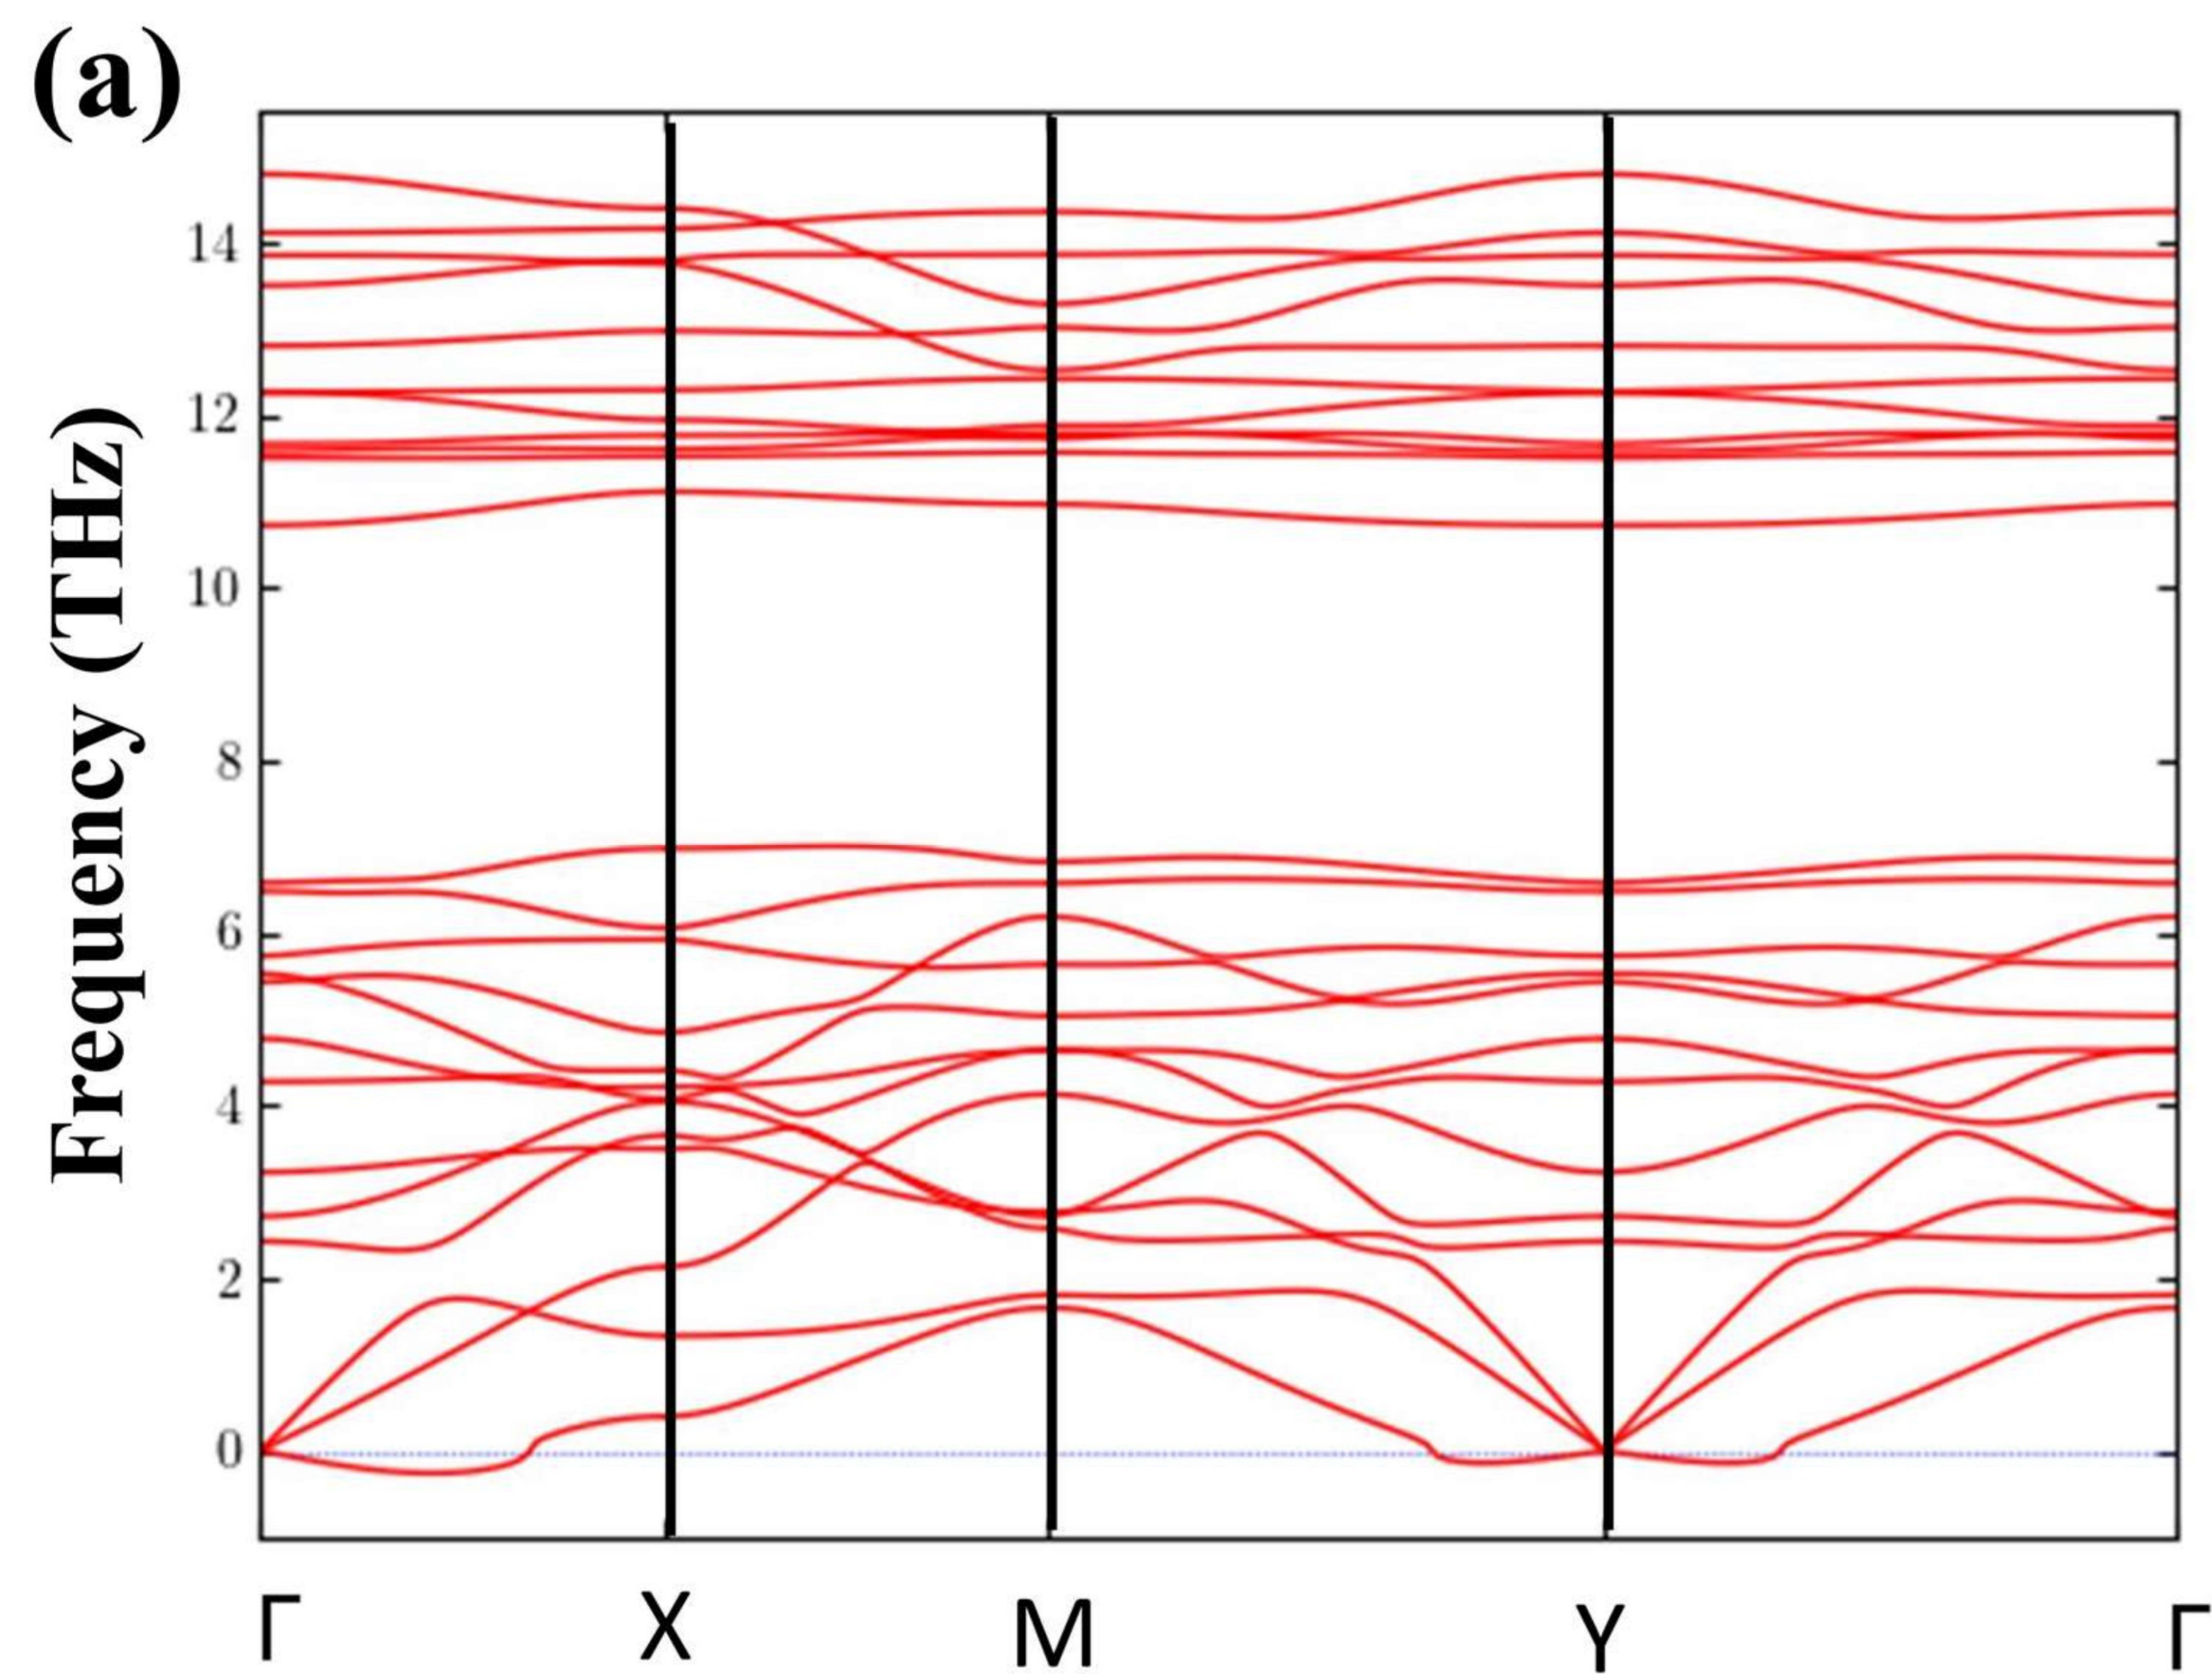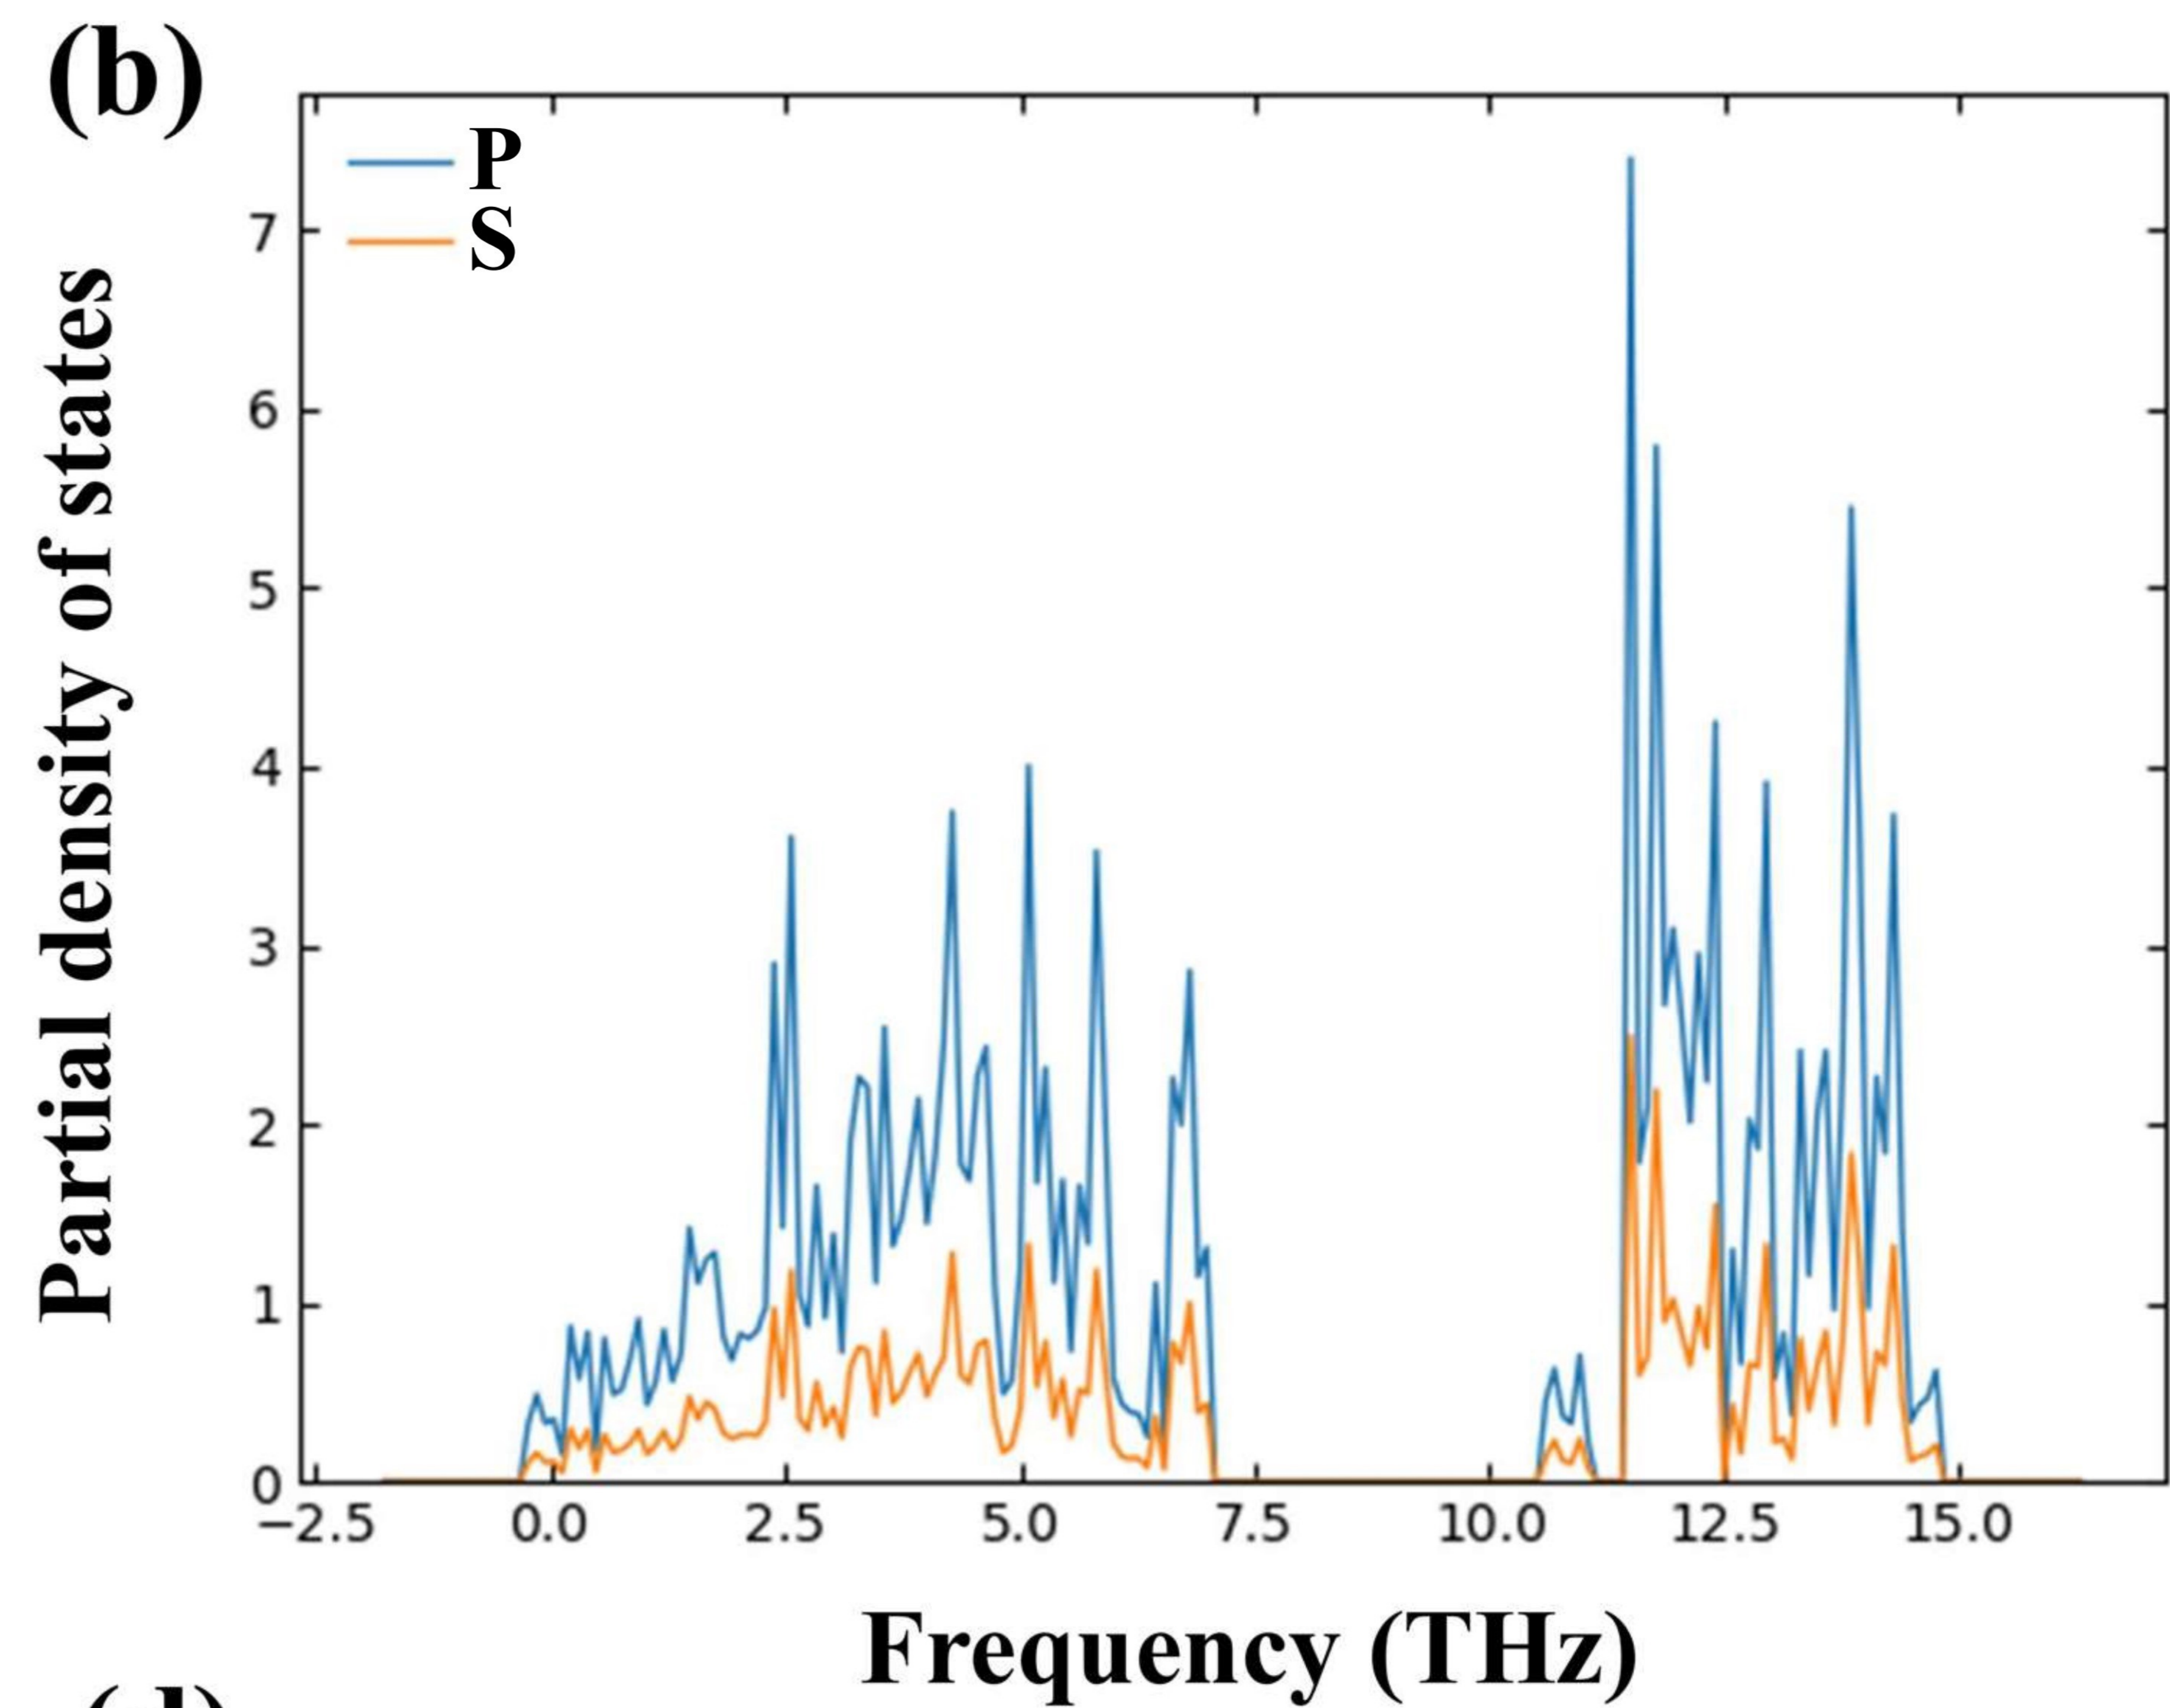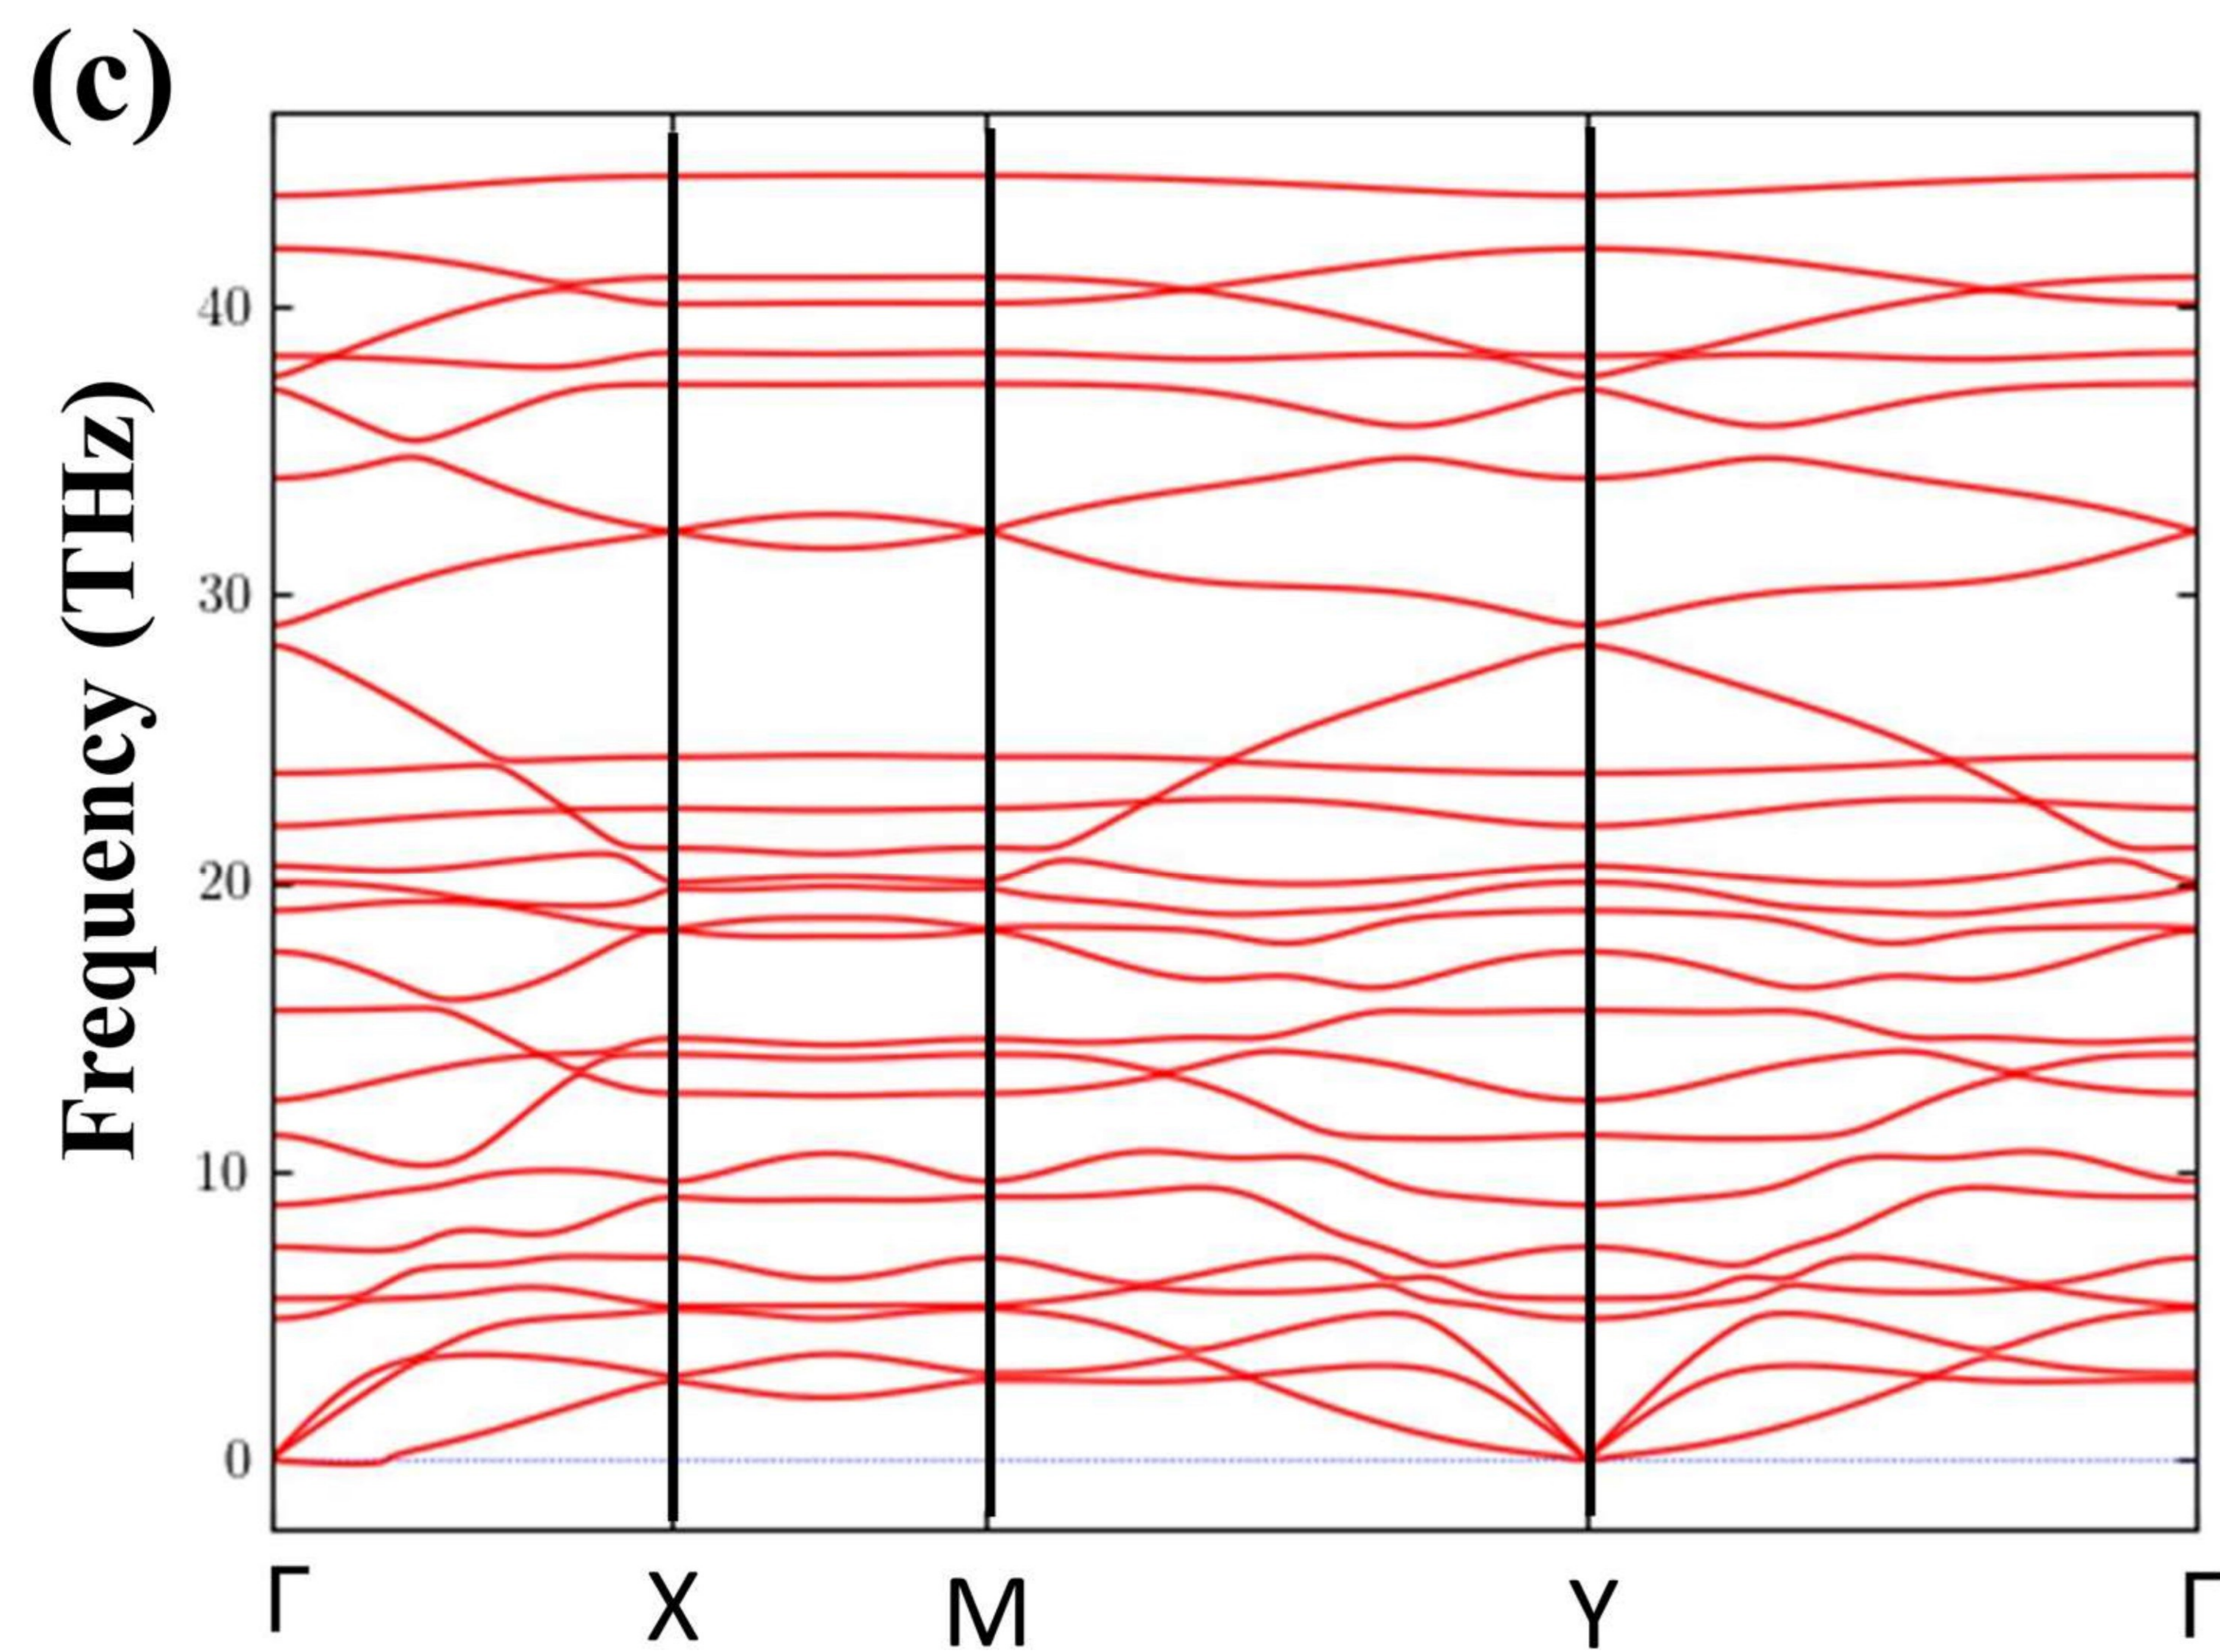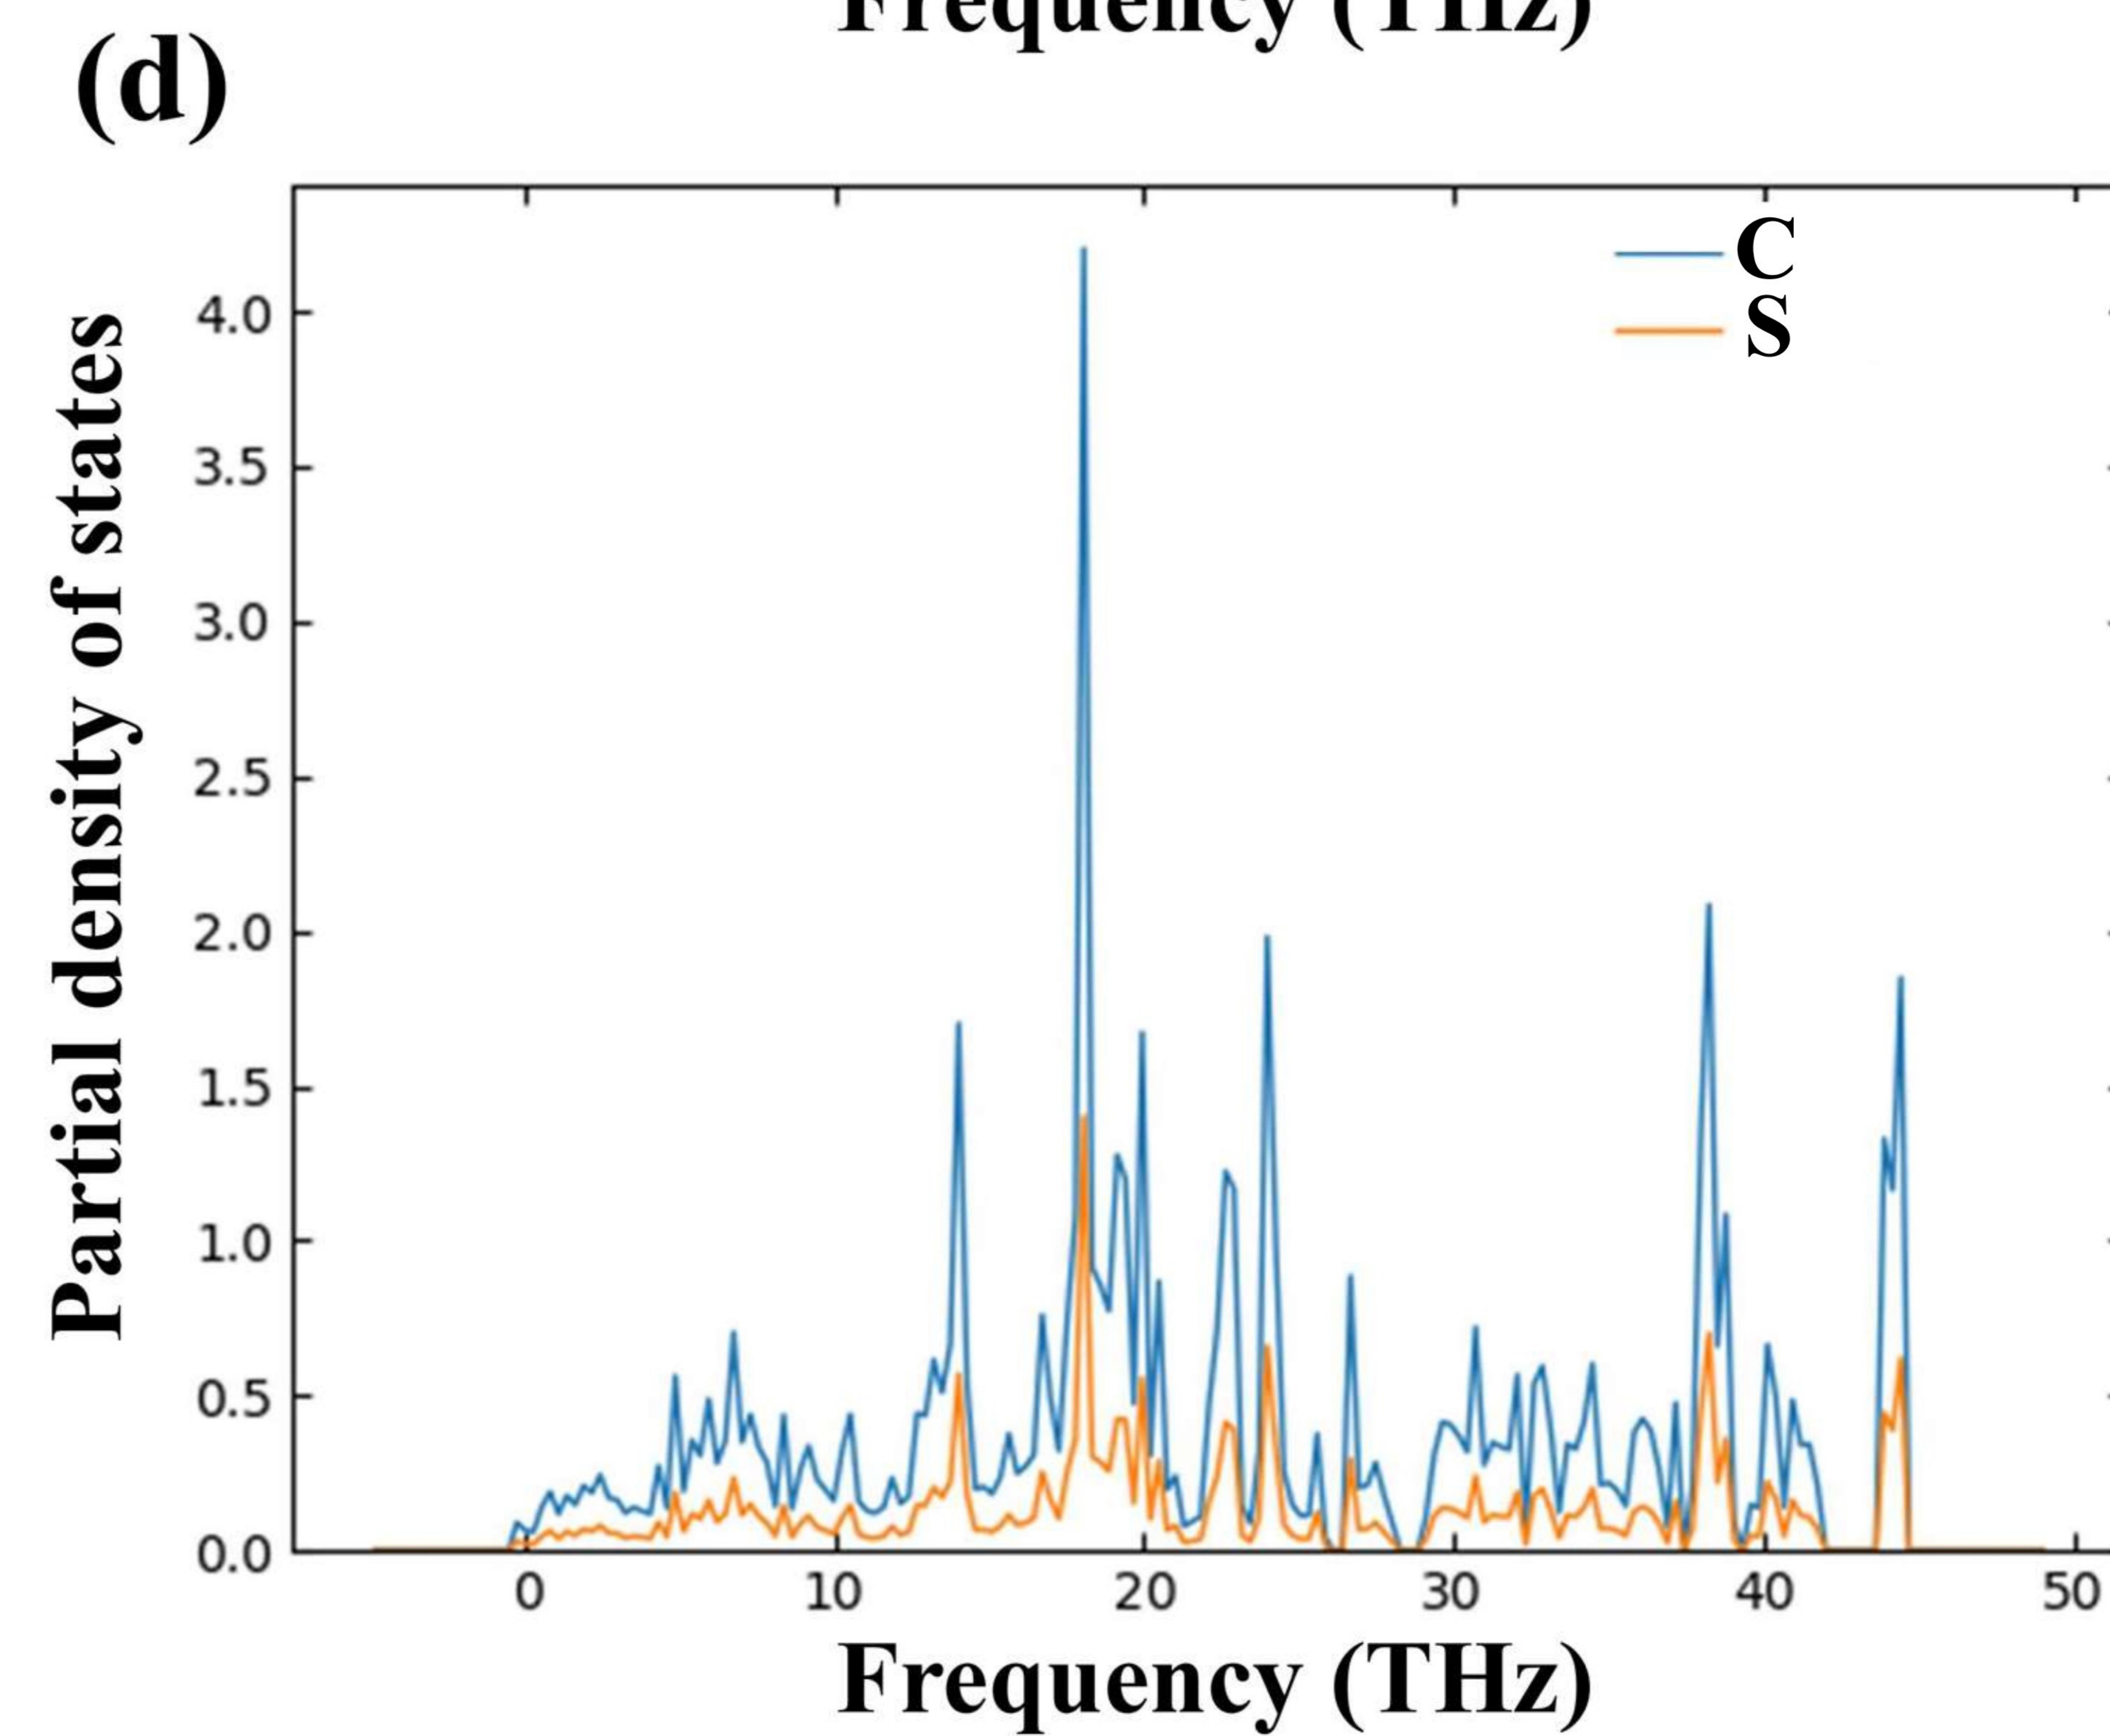

Supplement: d3cp06014d4.pdf [file d3cp06014d4.pdf]

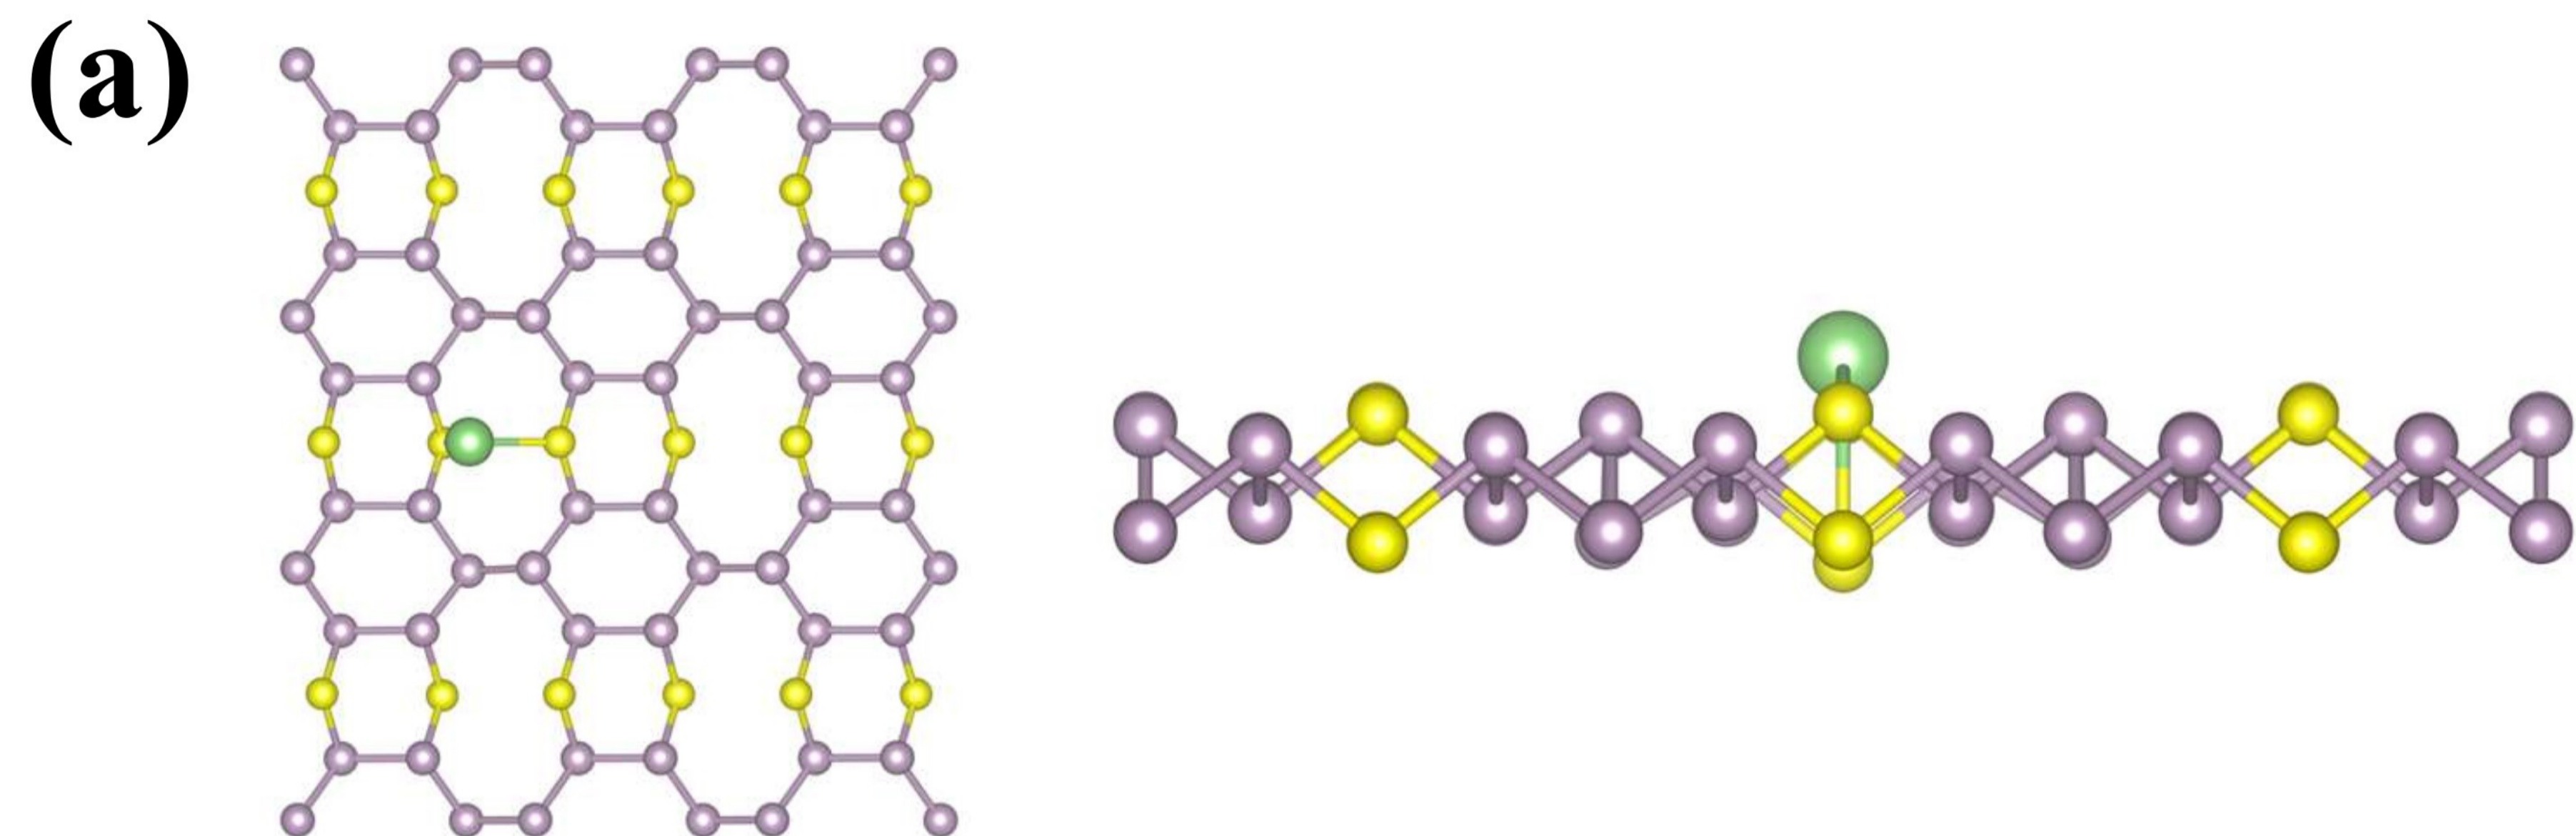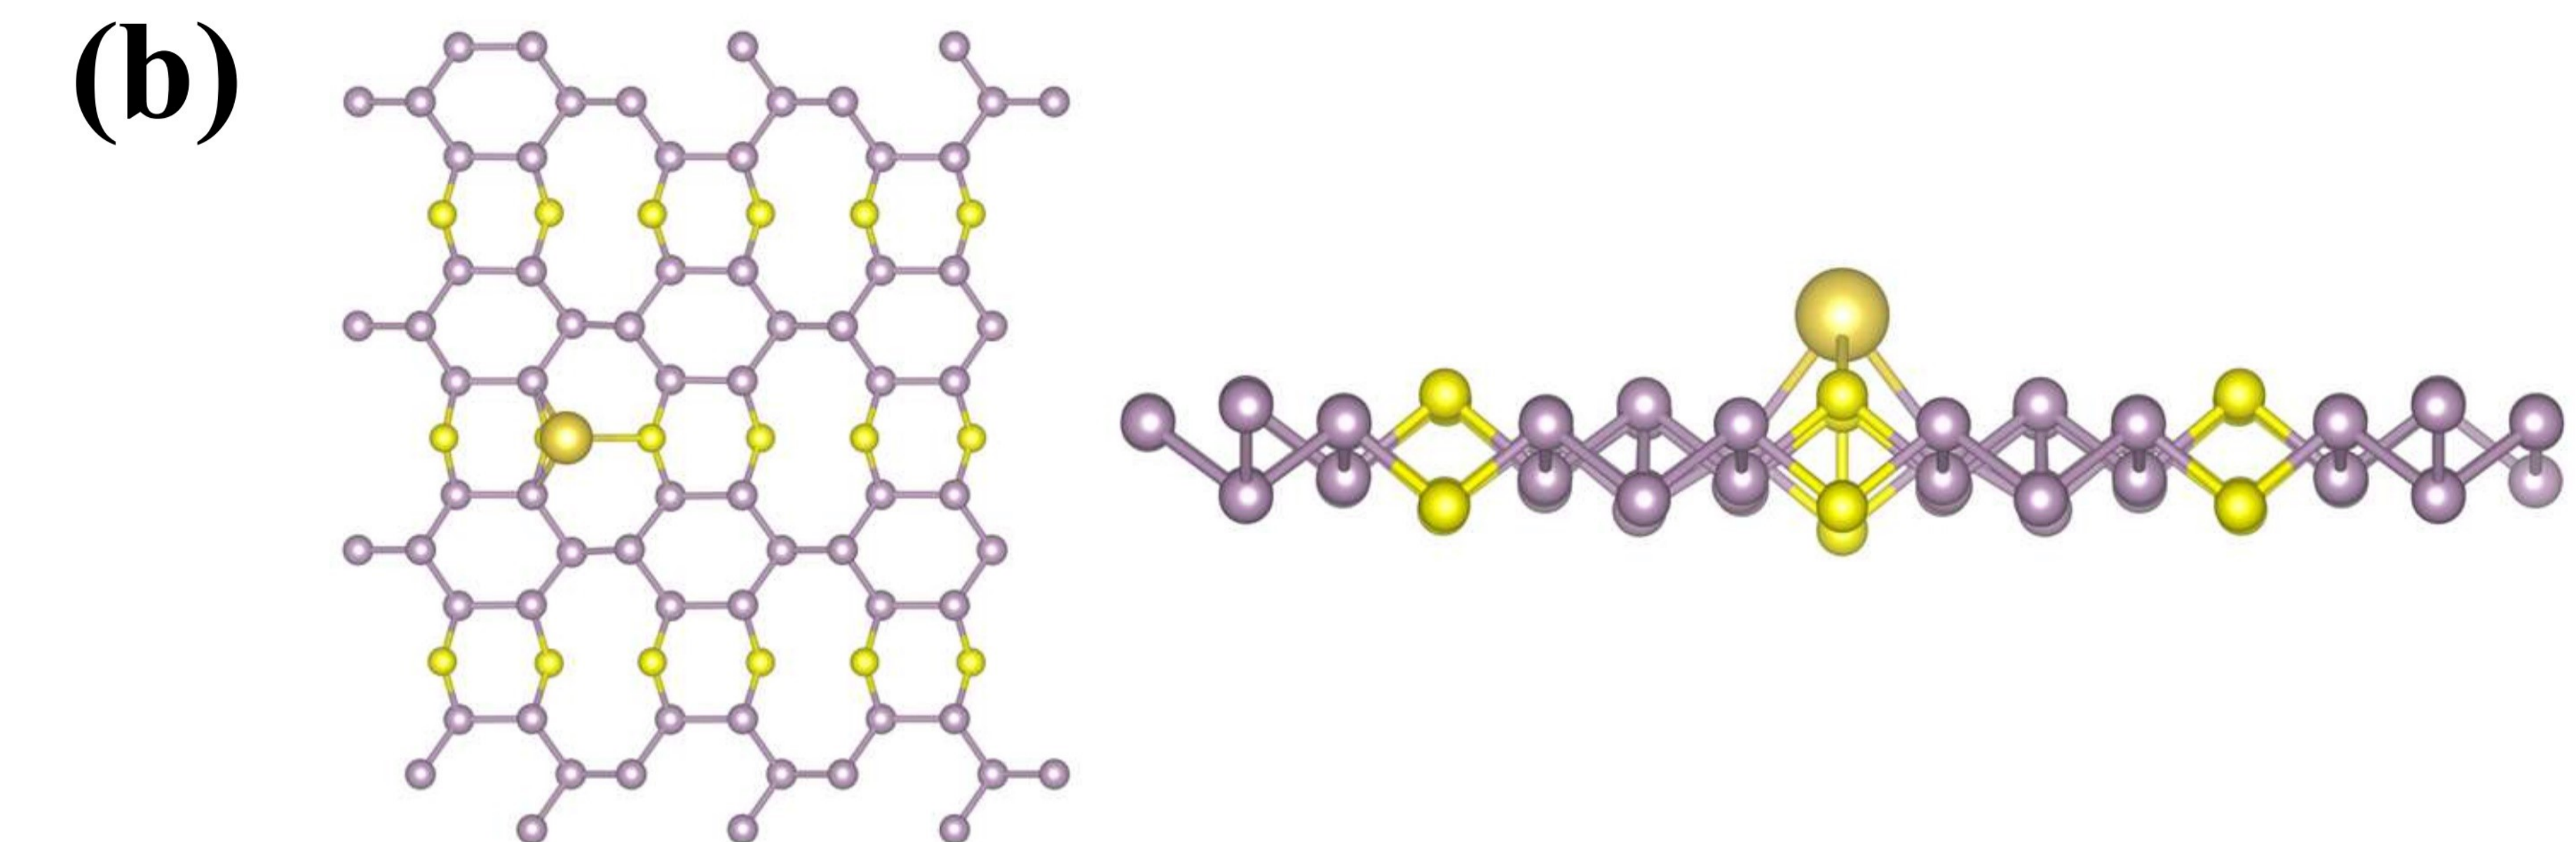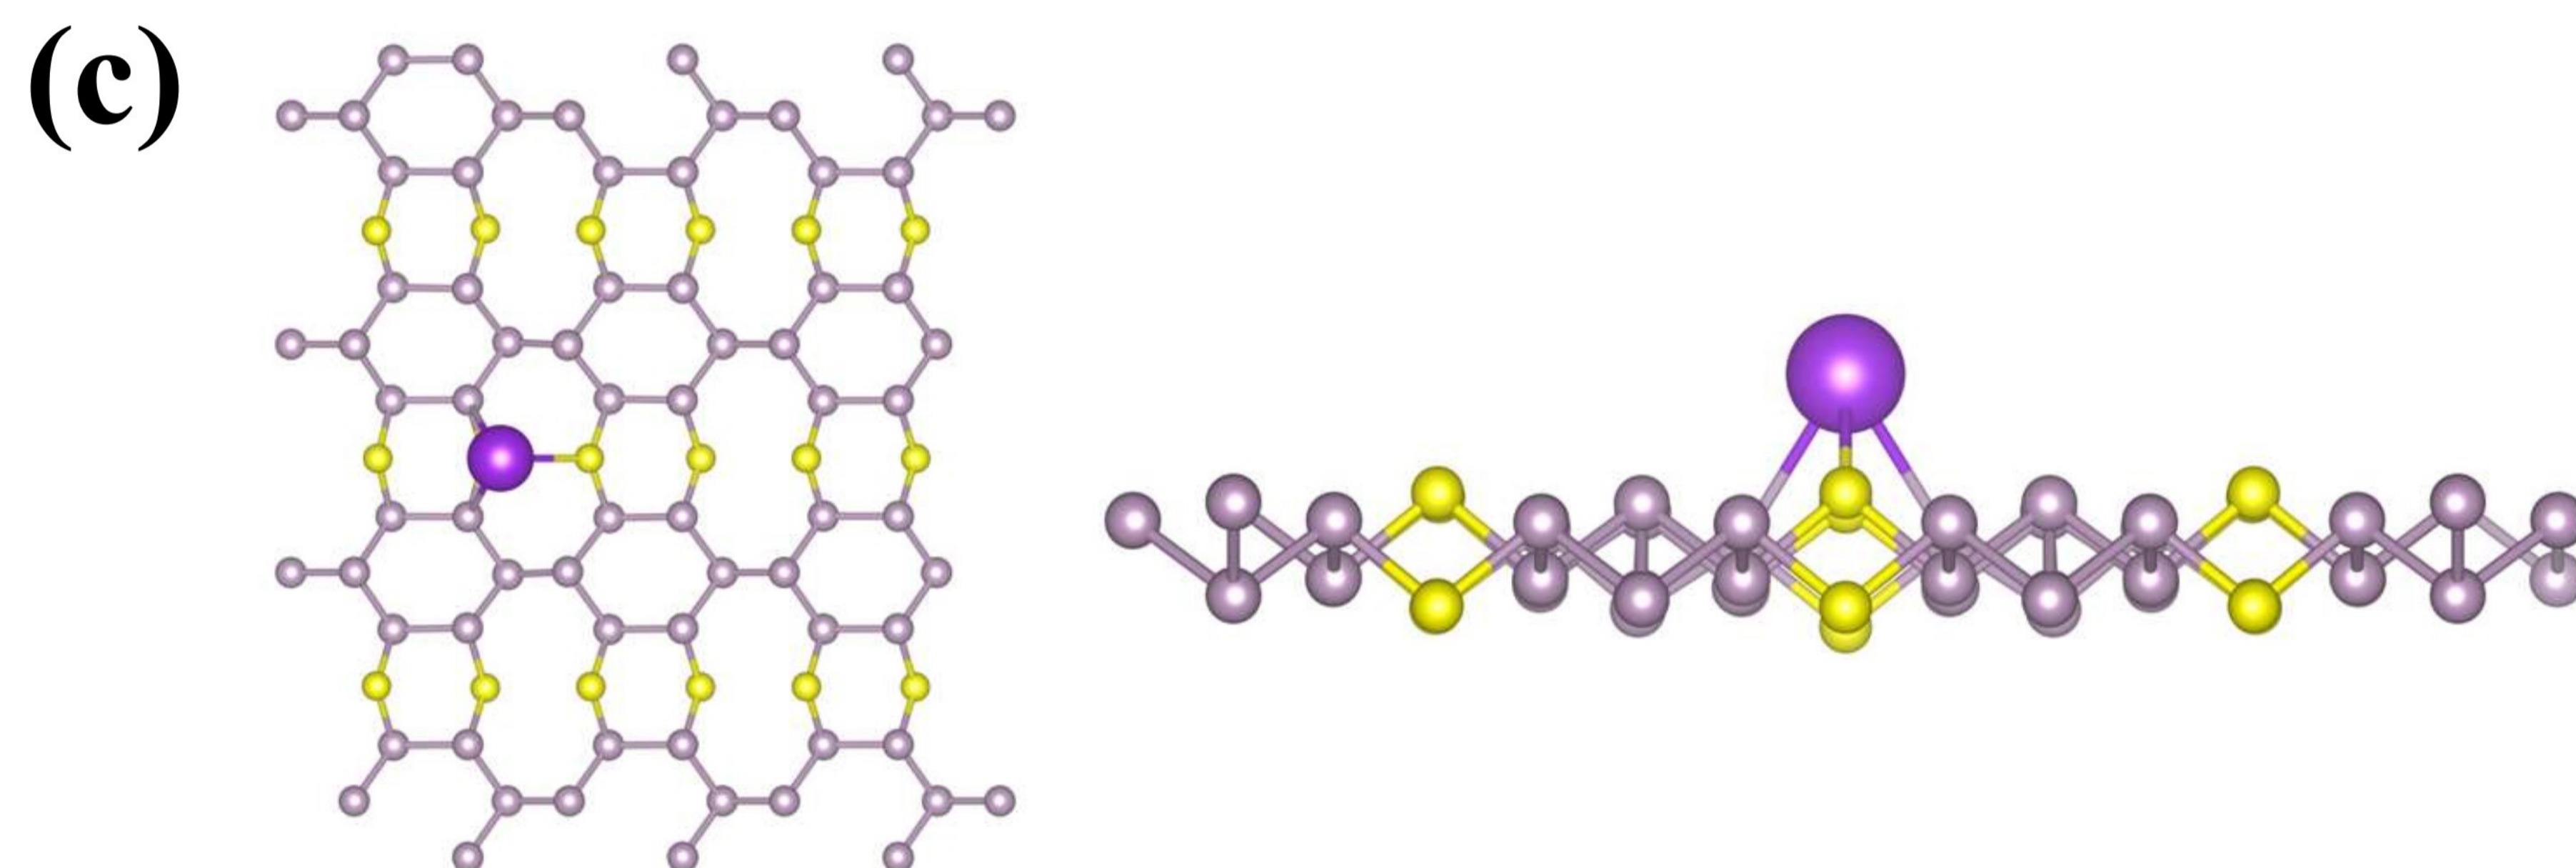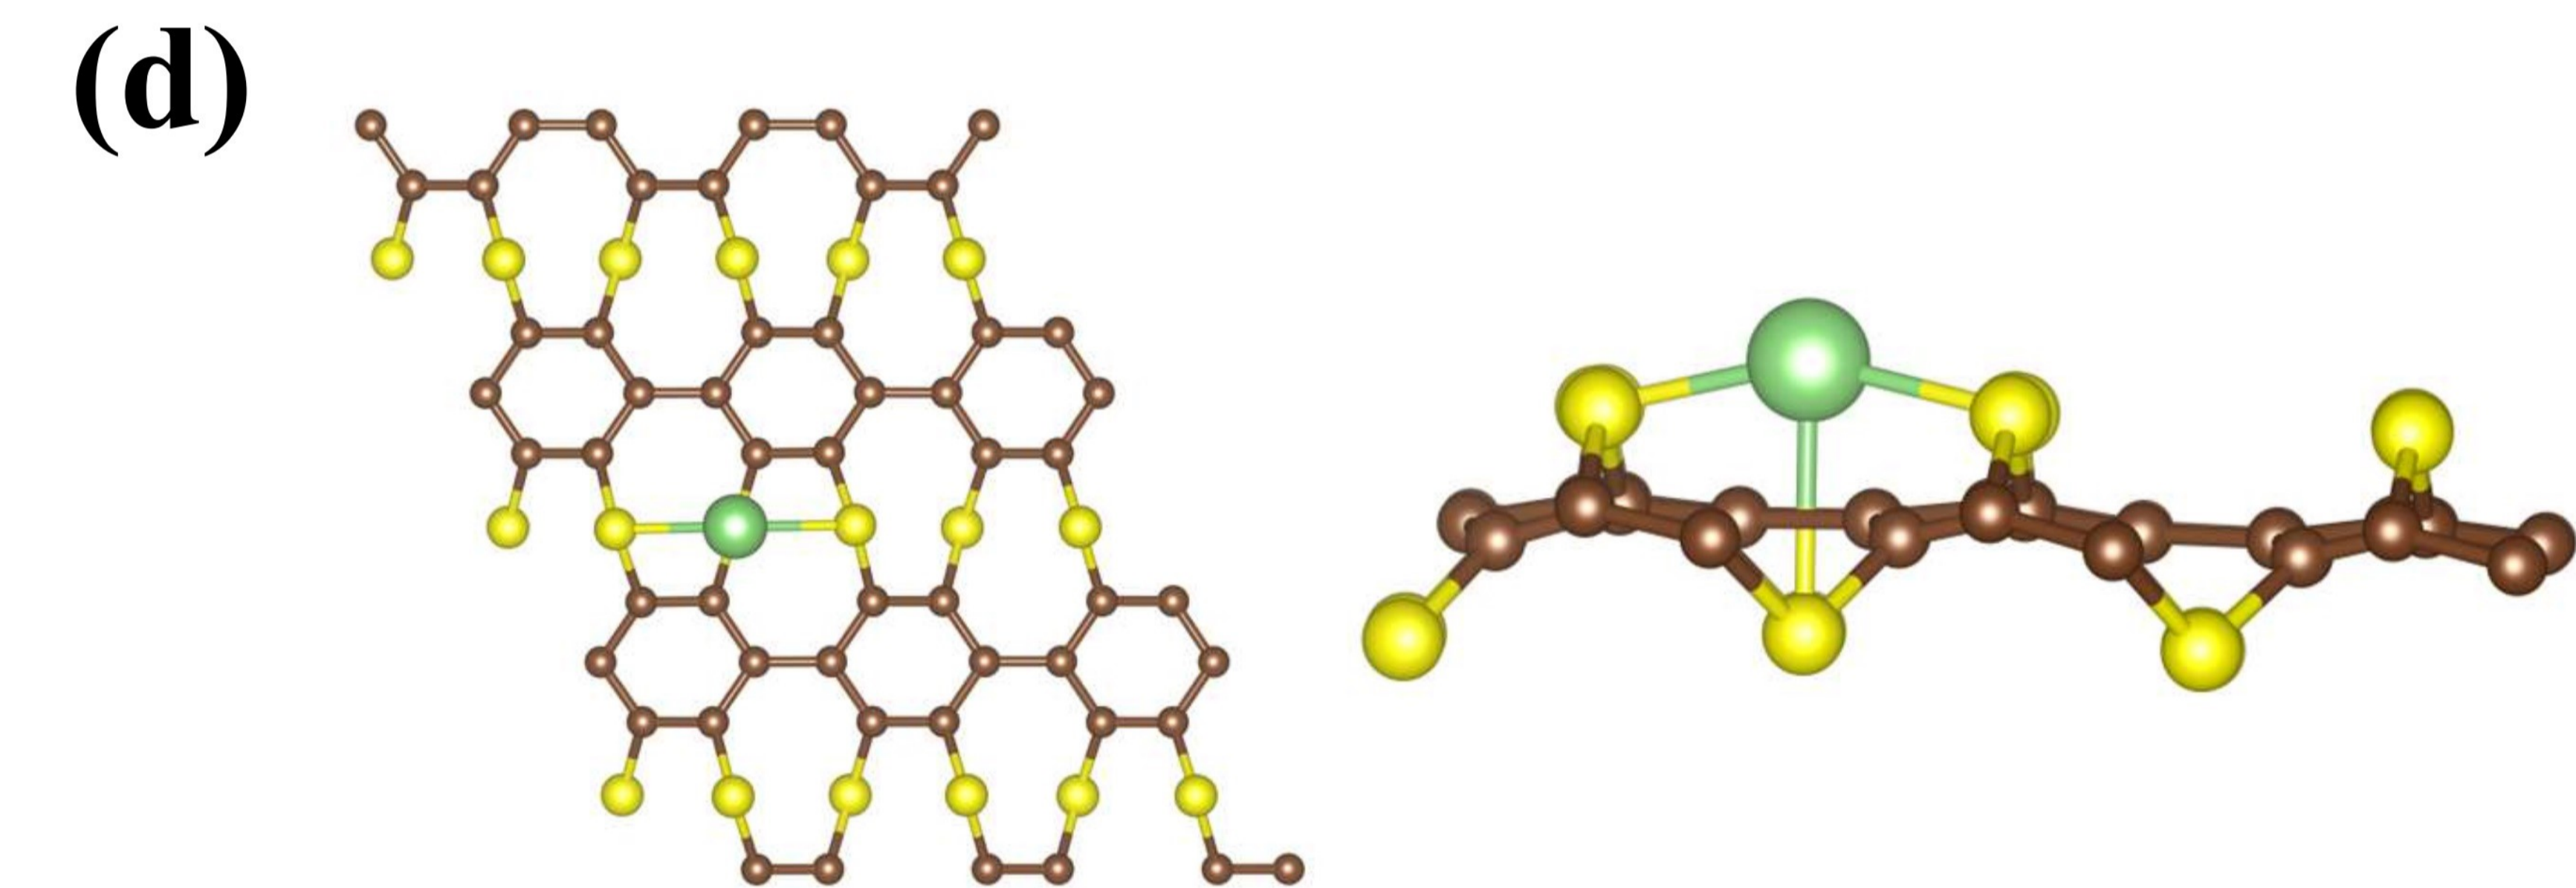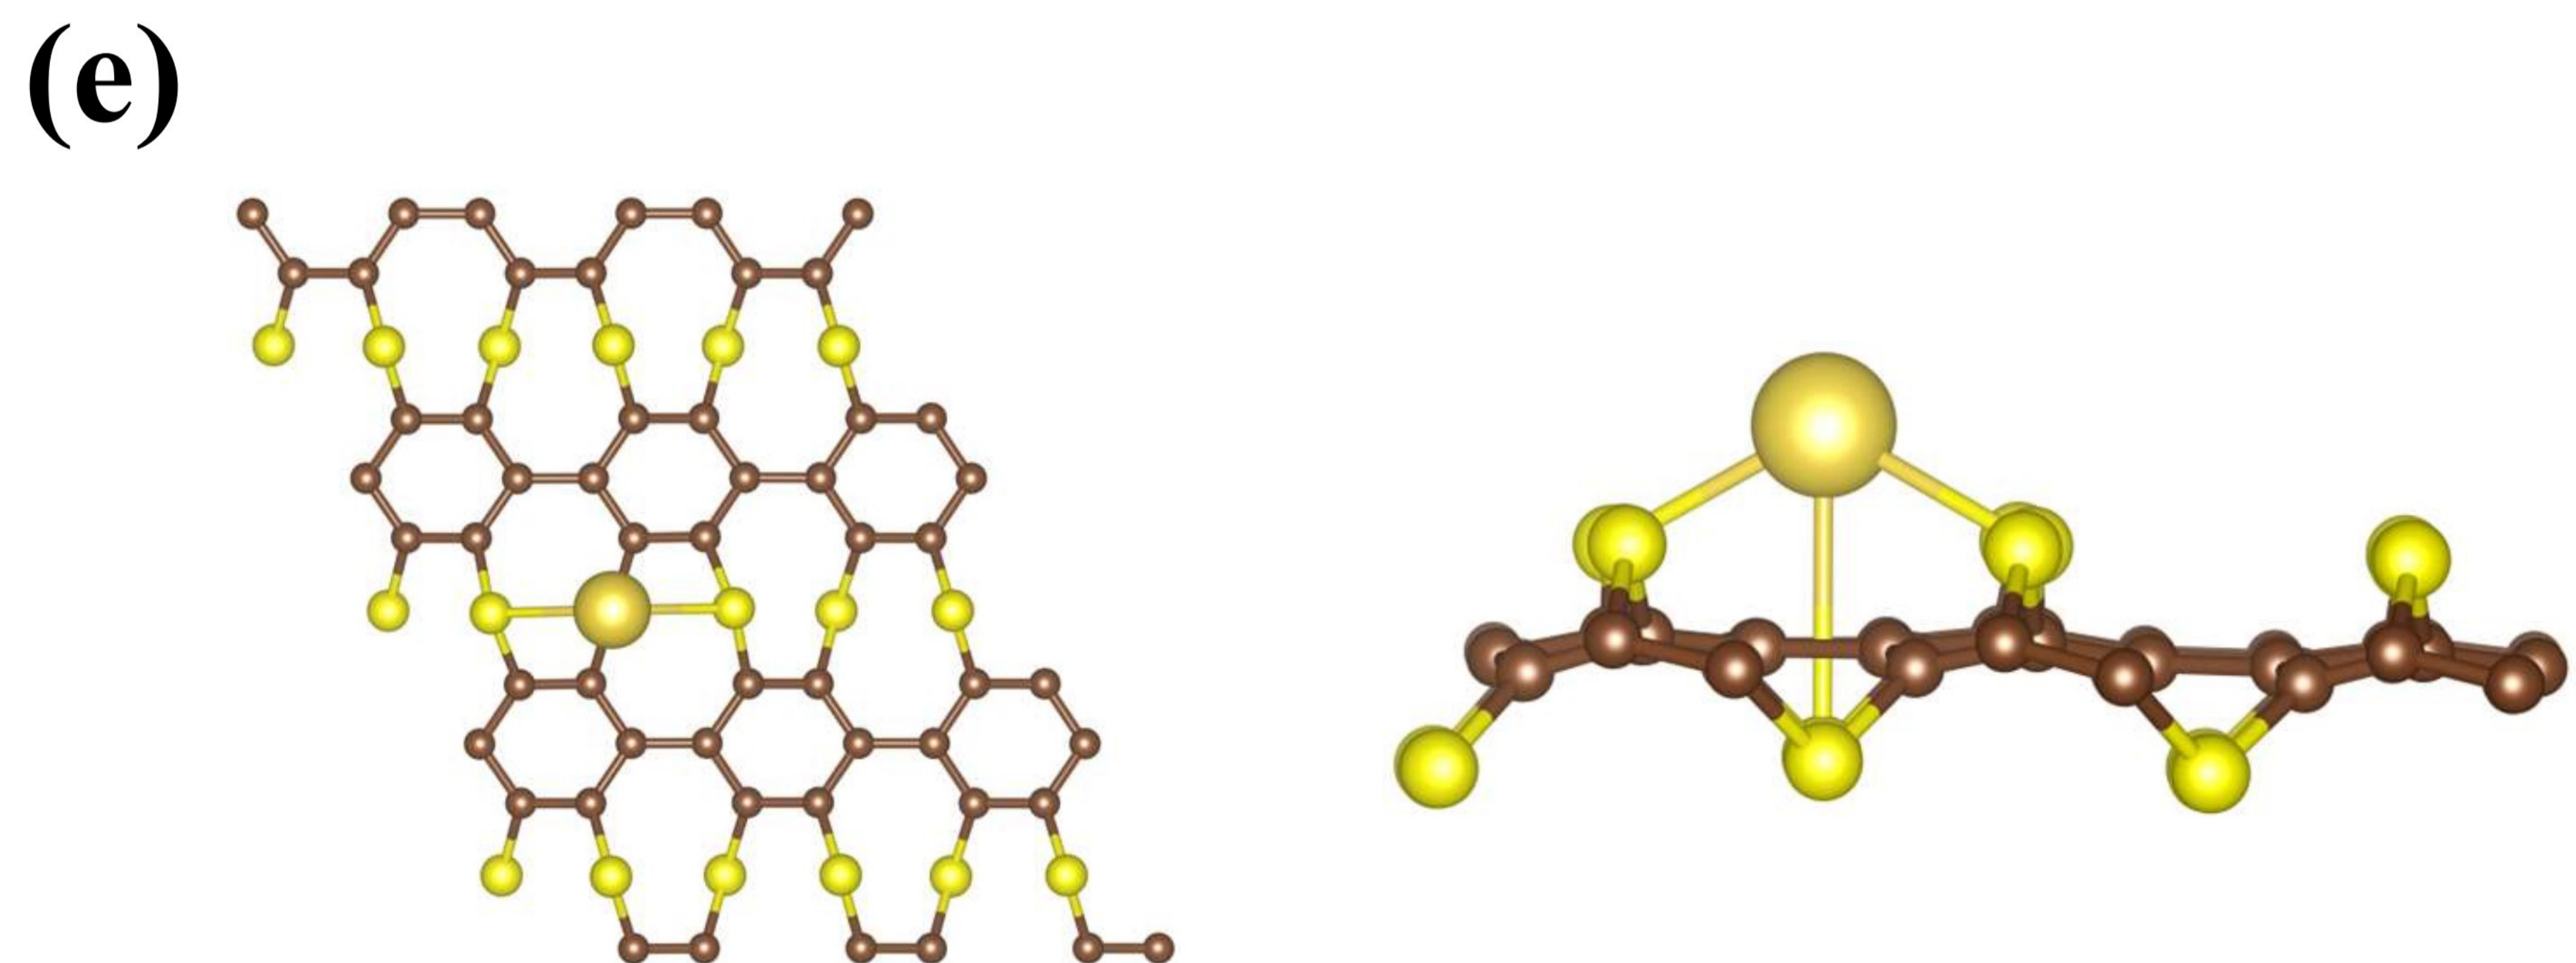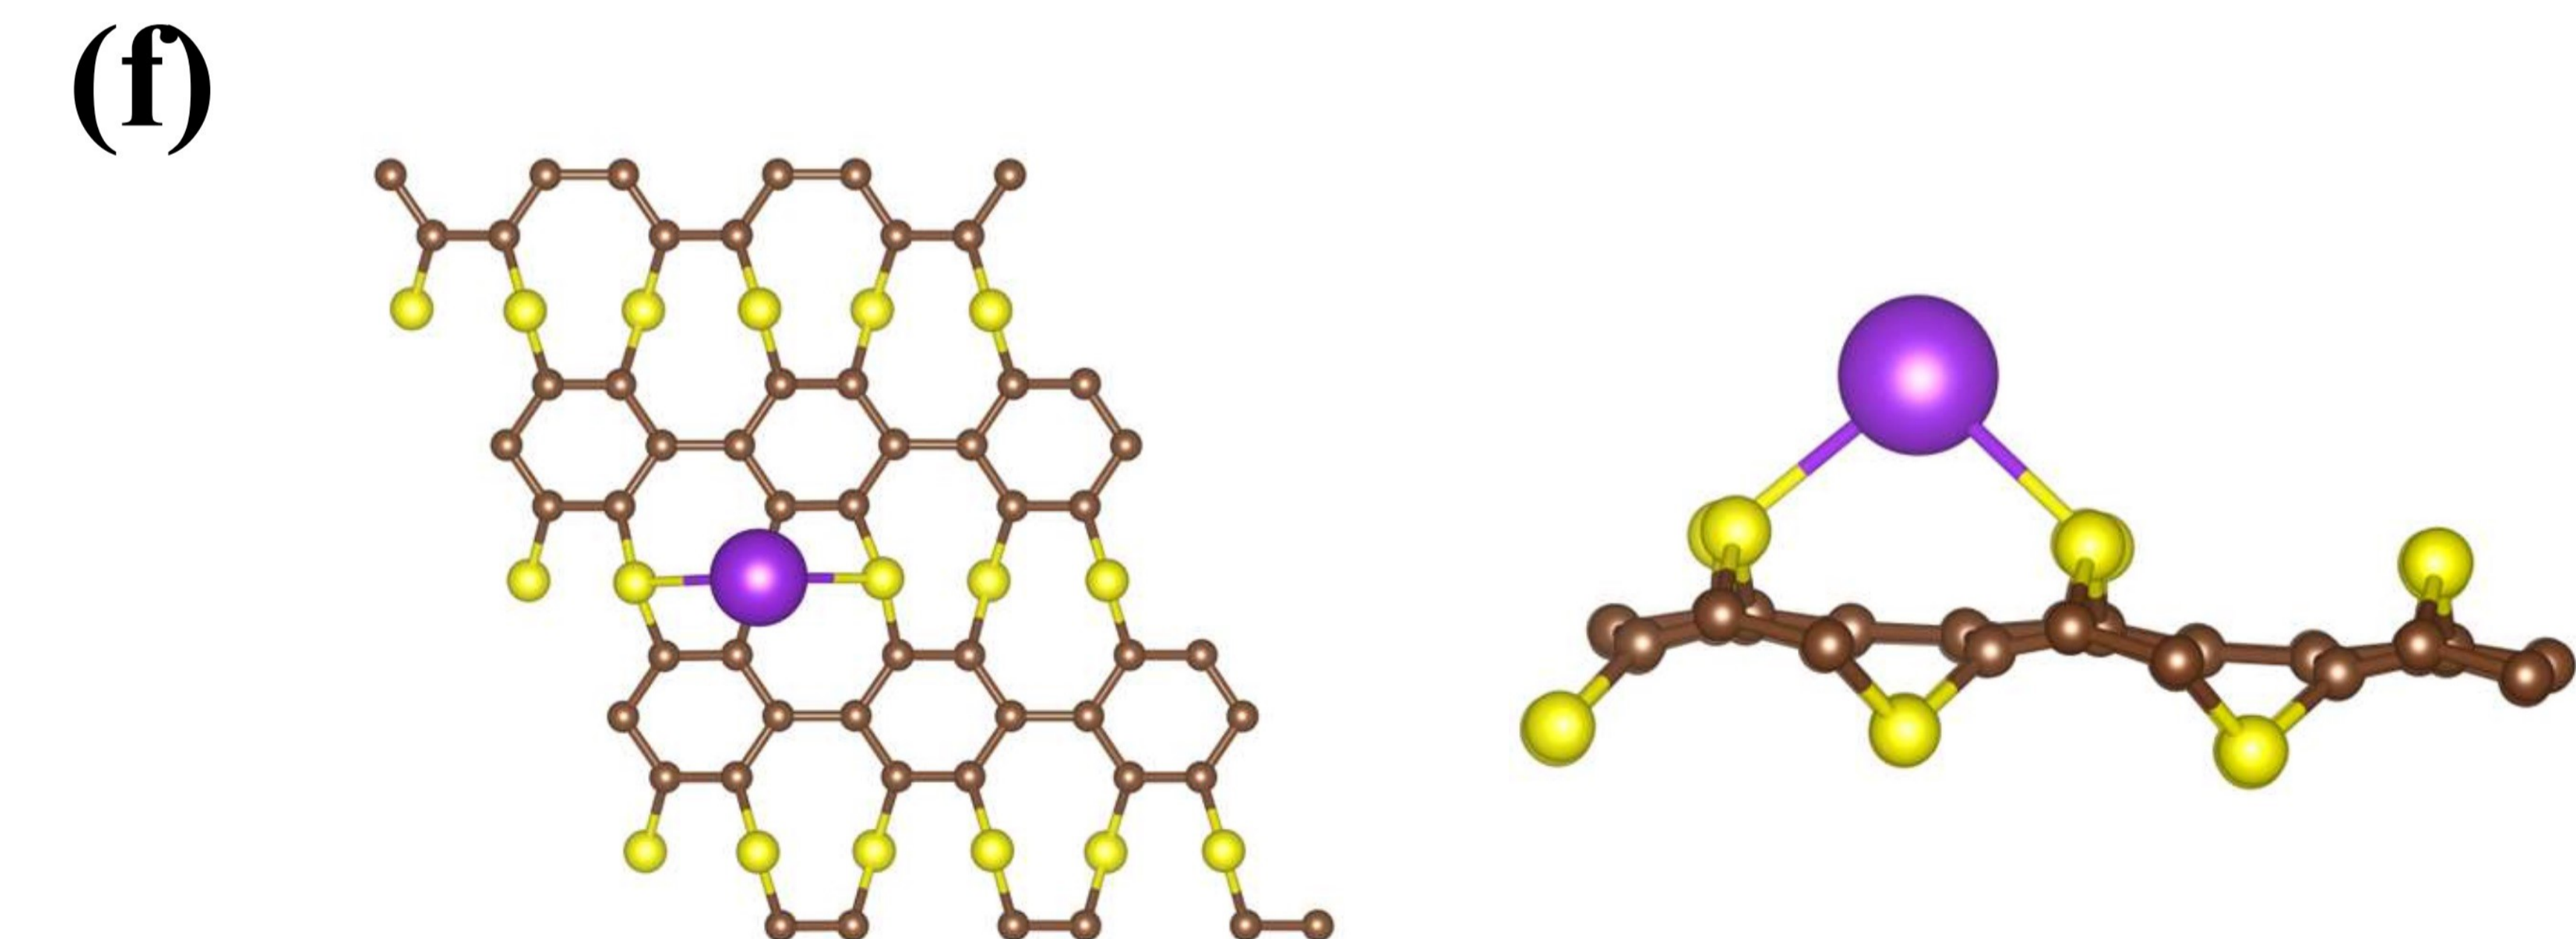

Supplement: d3cp06014d5.pdf [file d3cp06014d5.pdf]

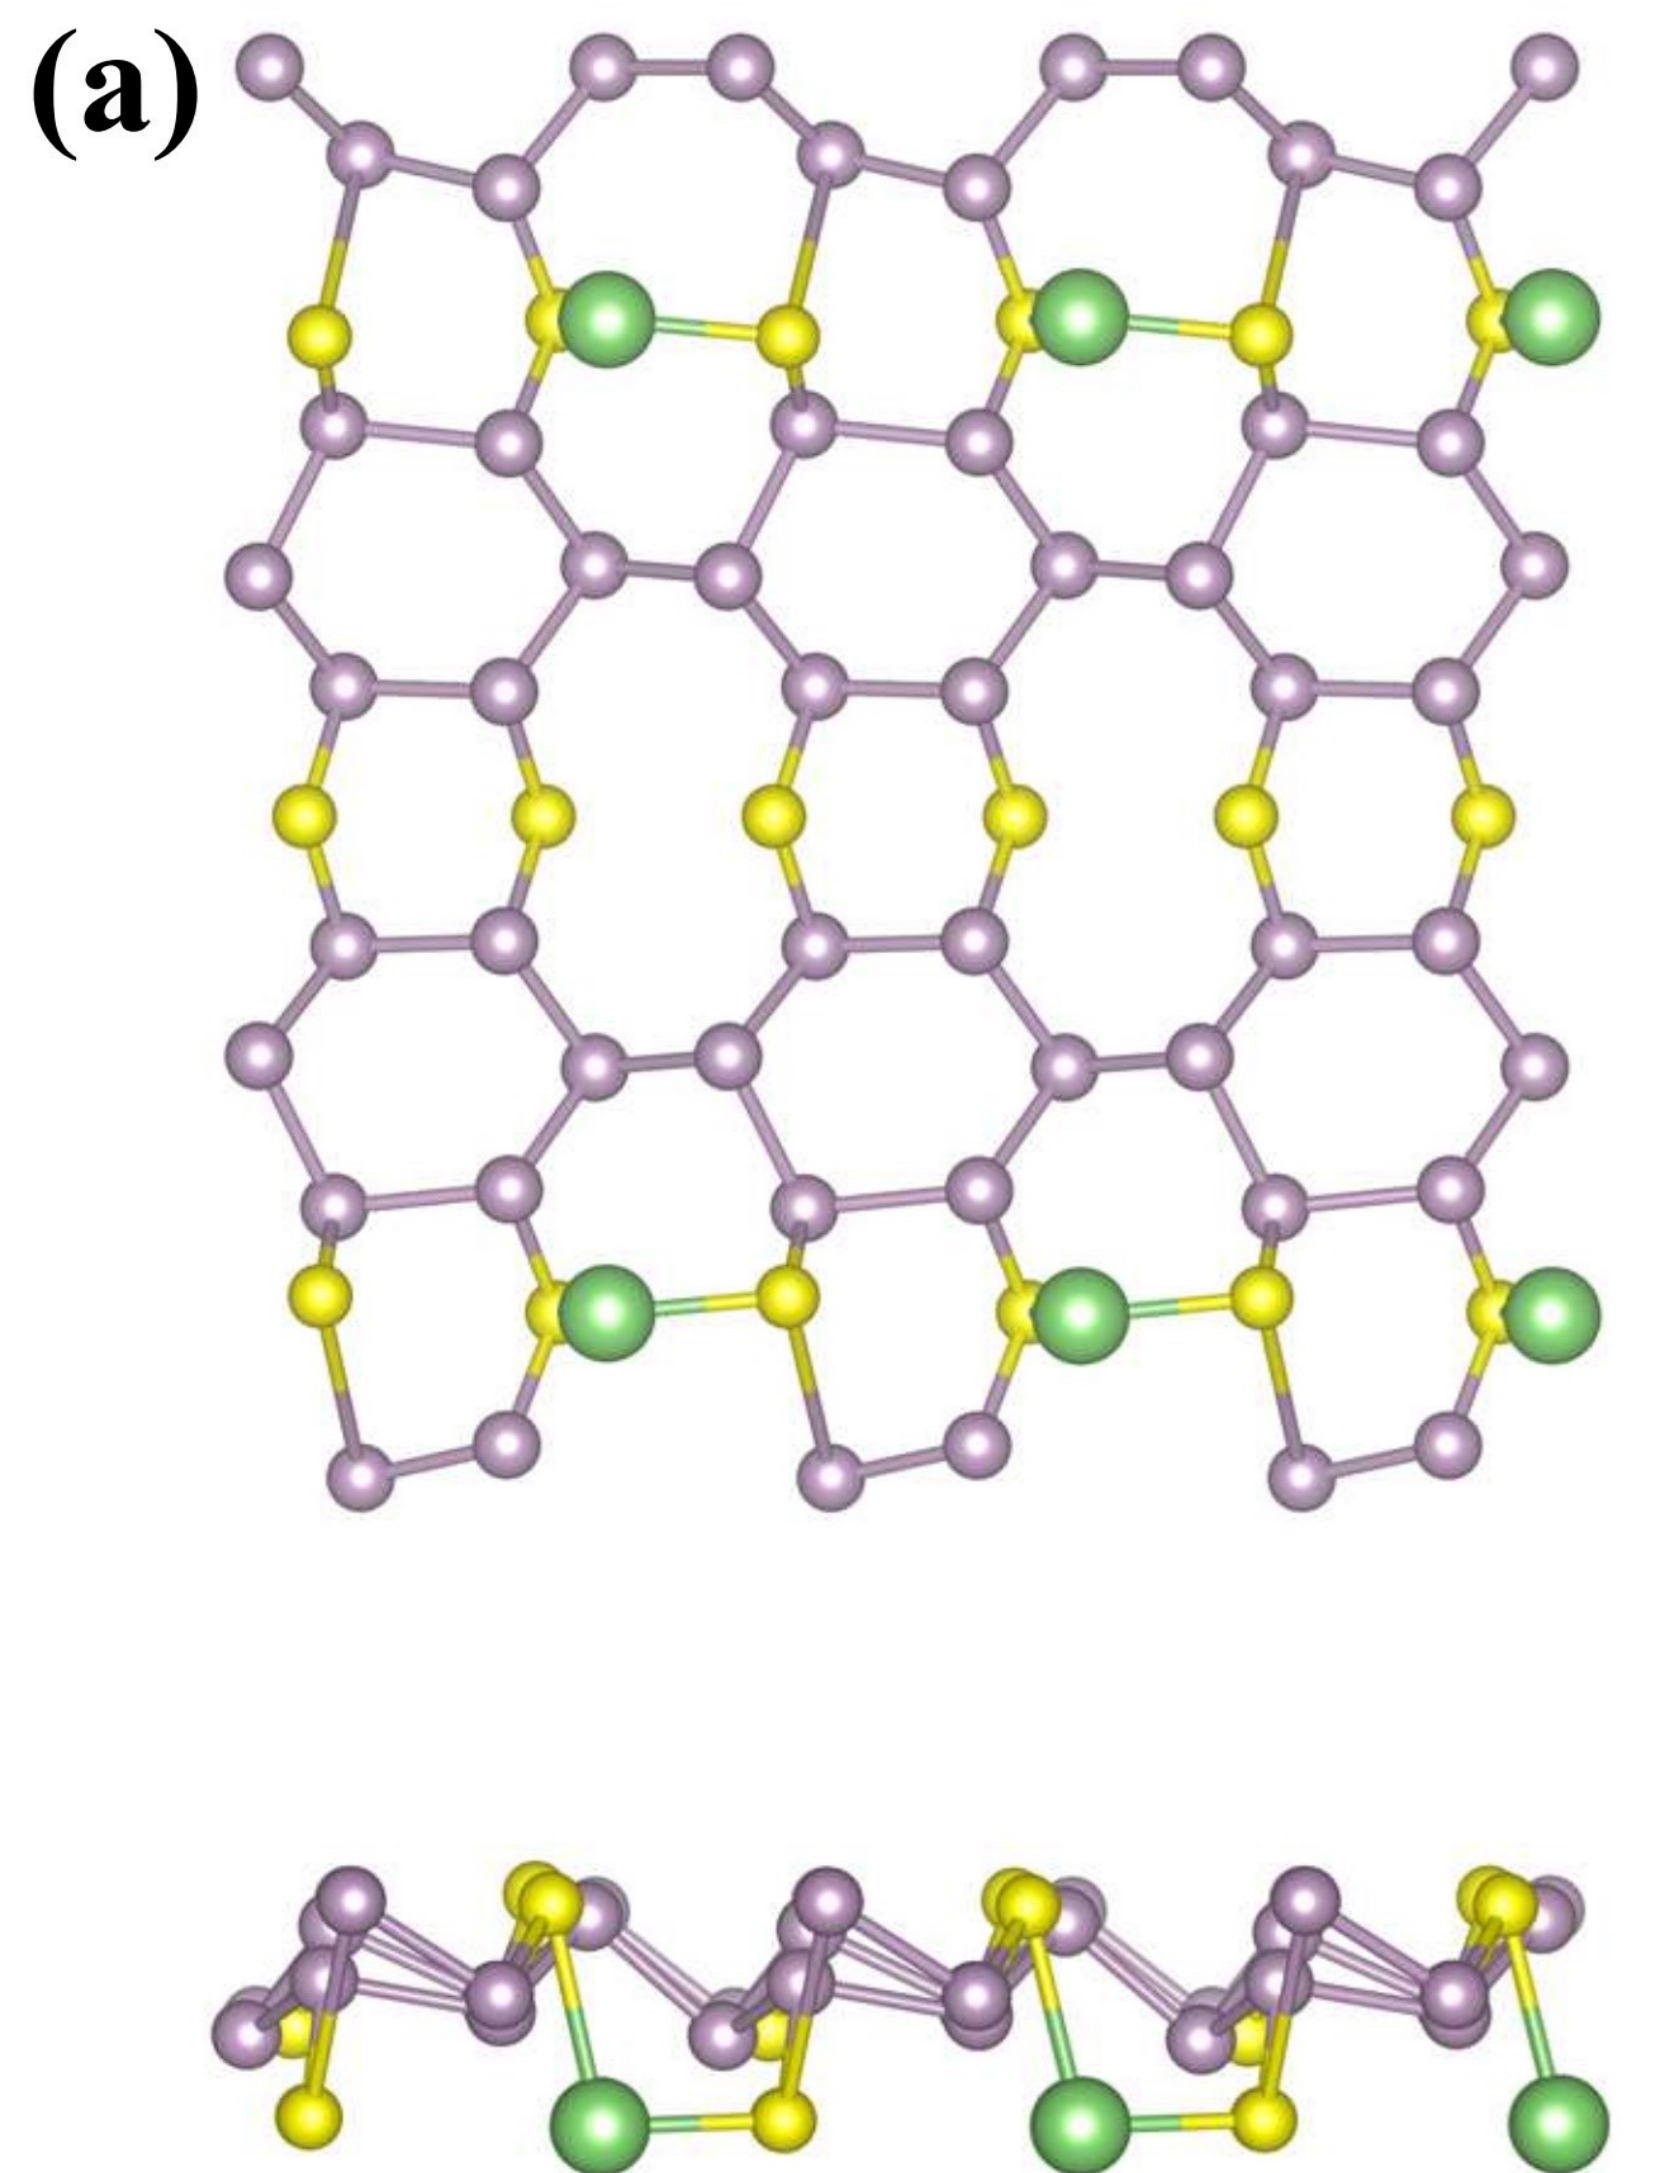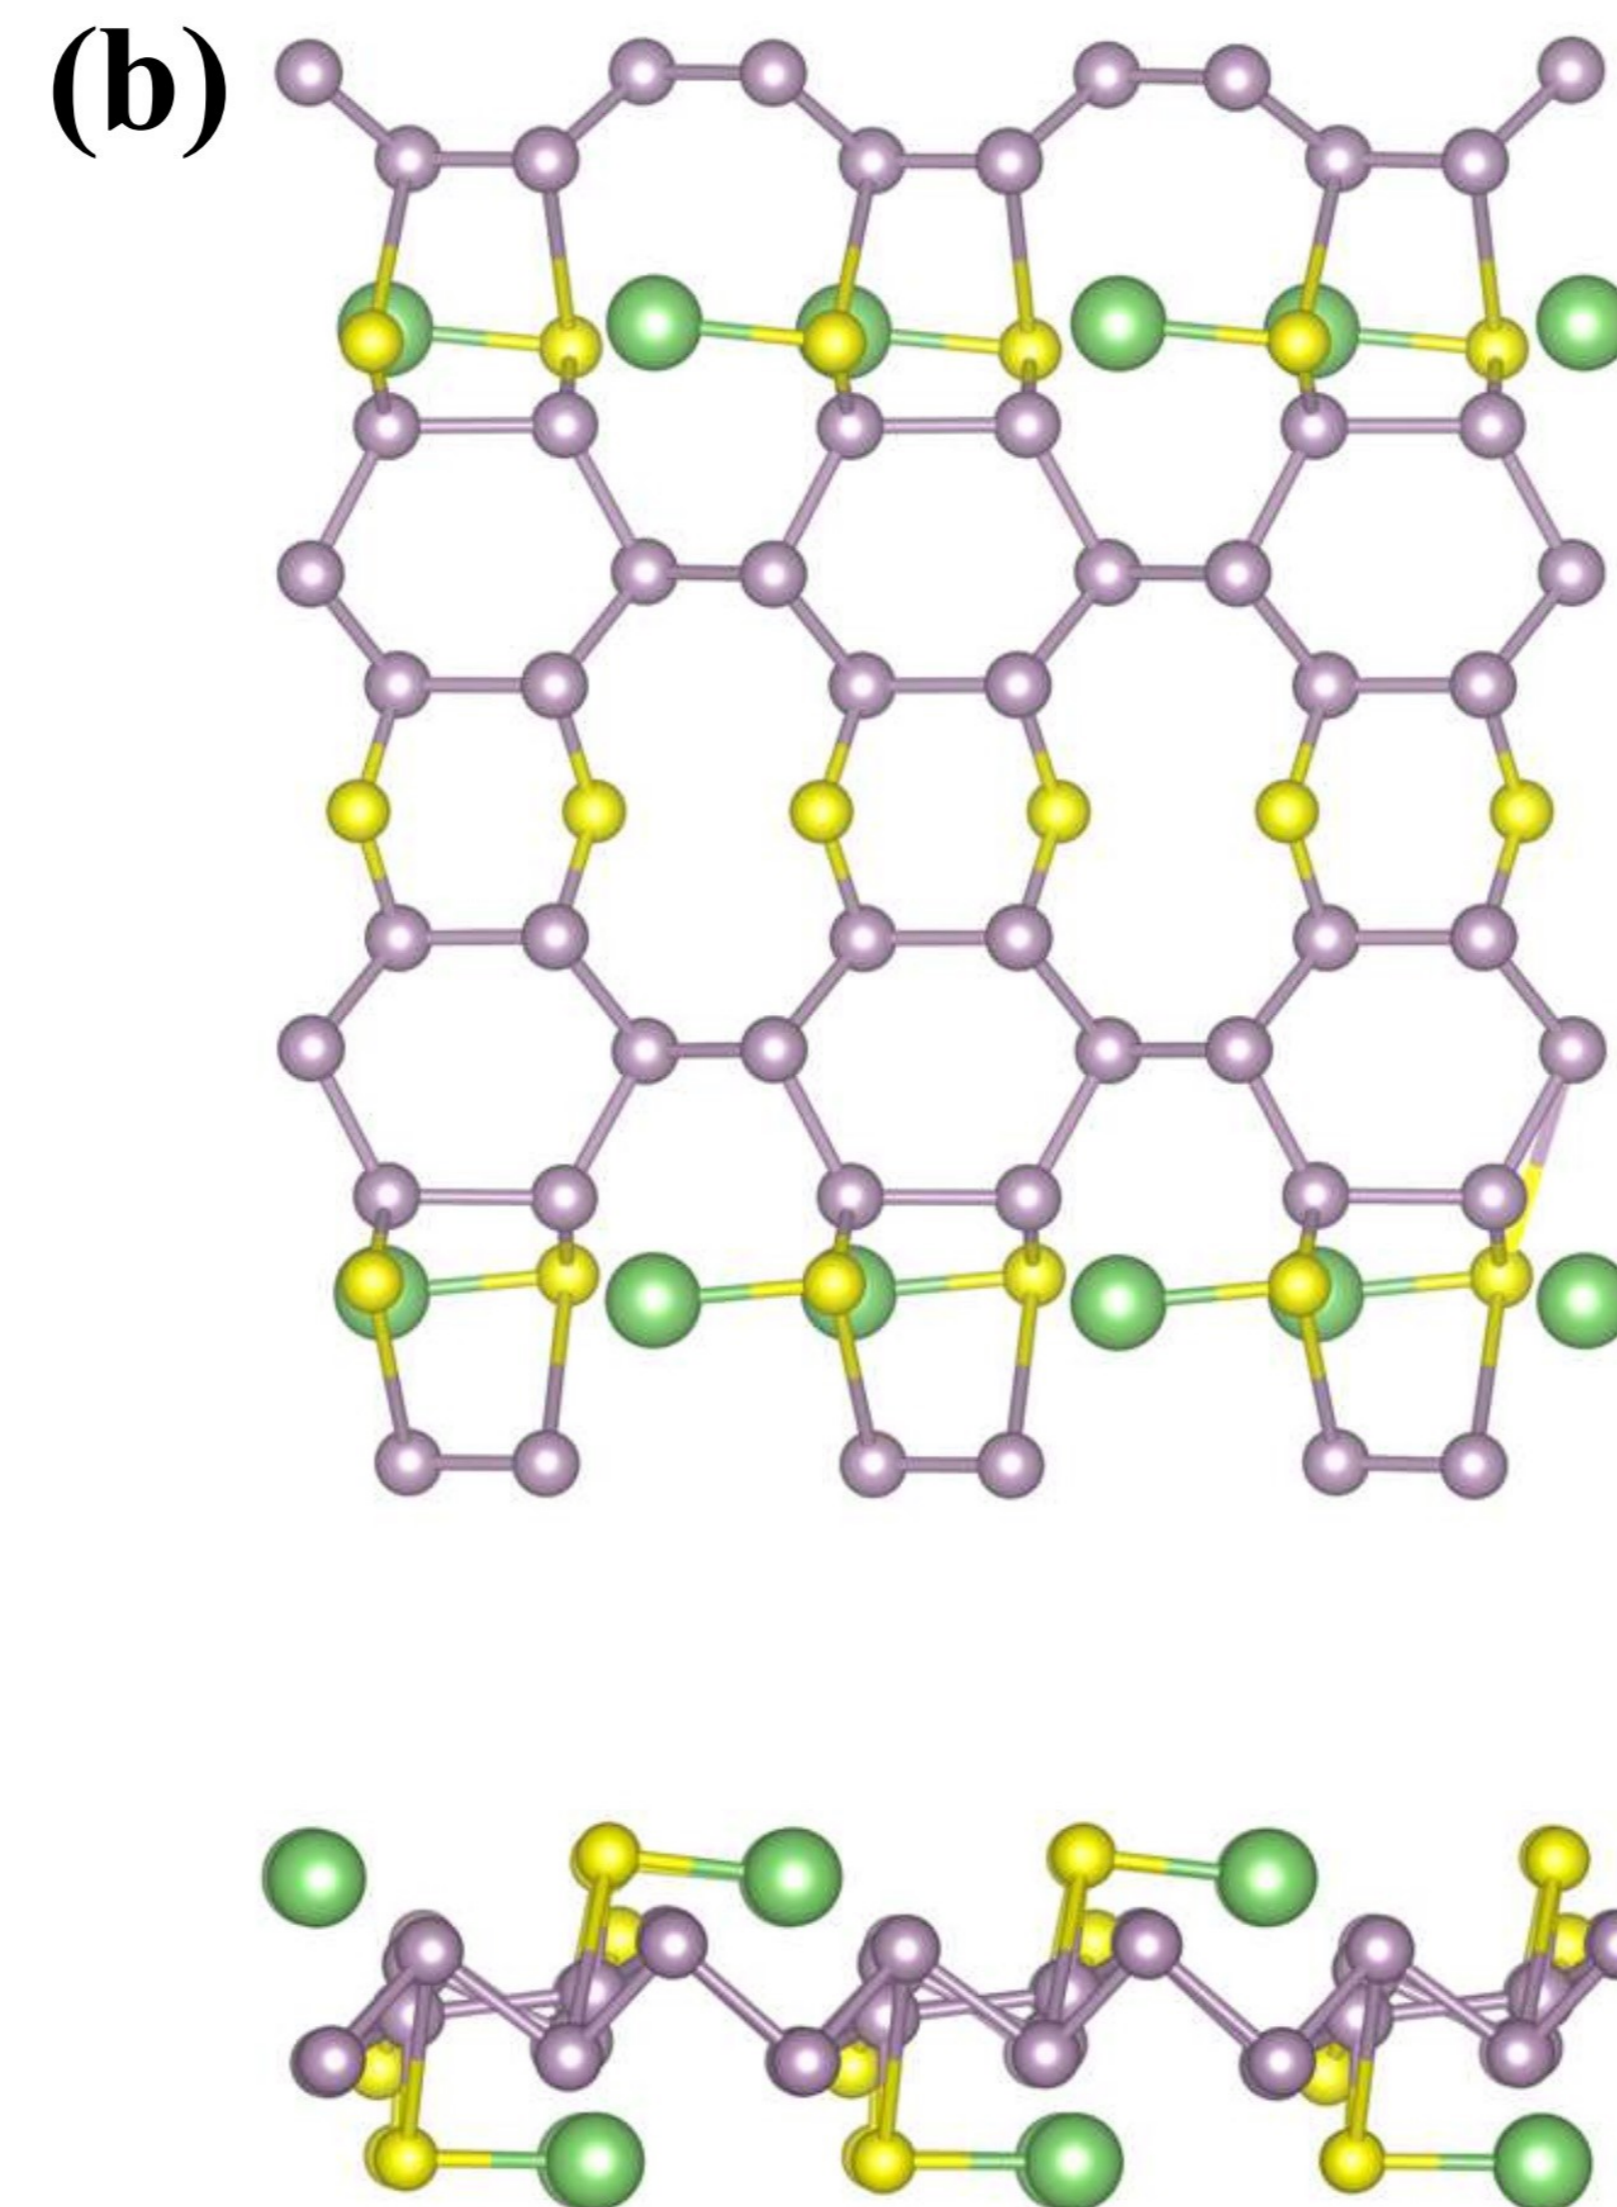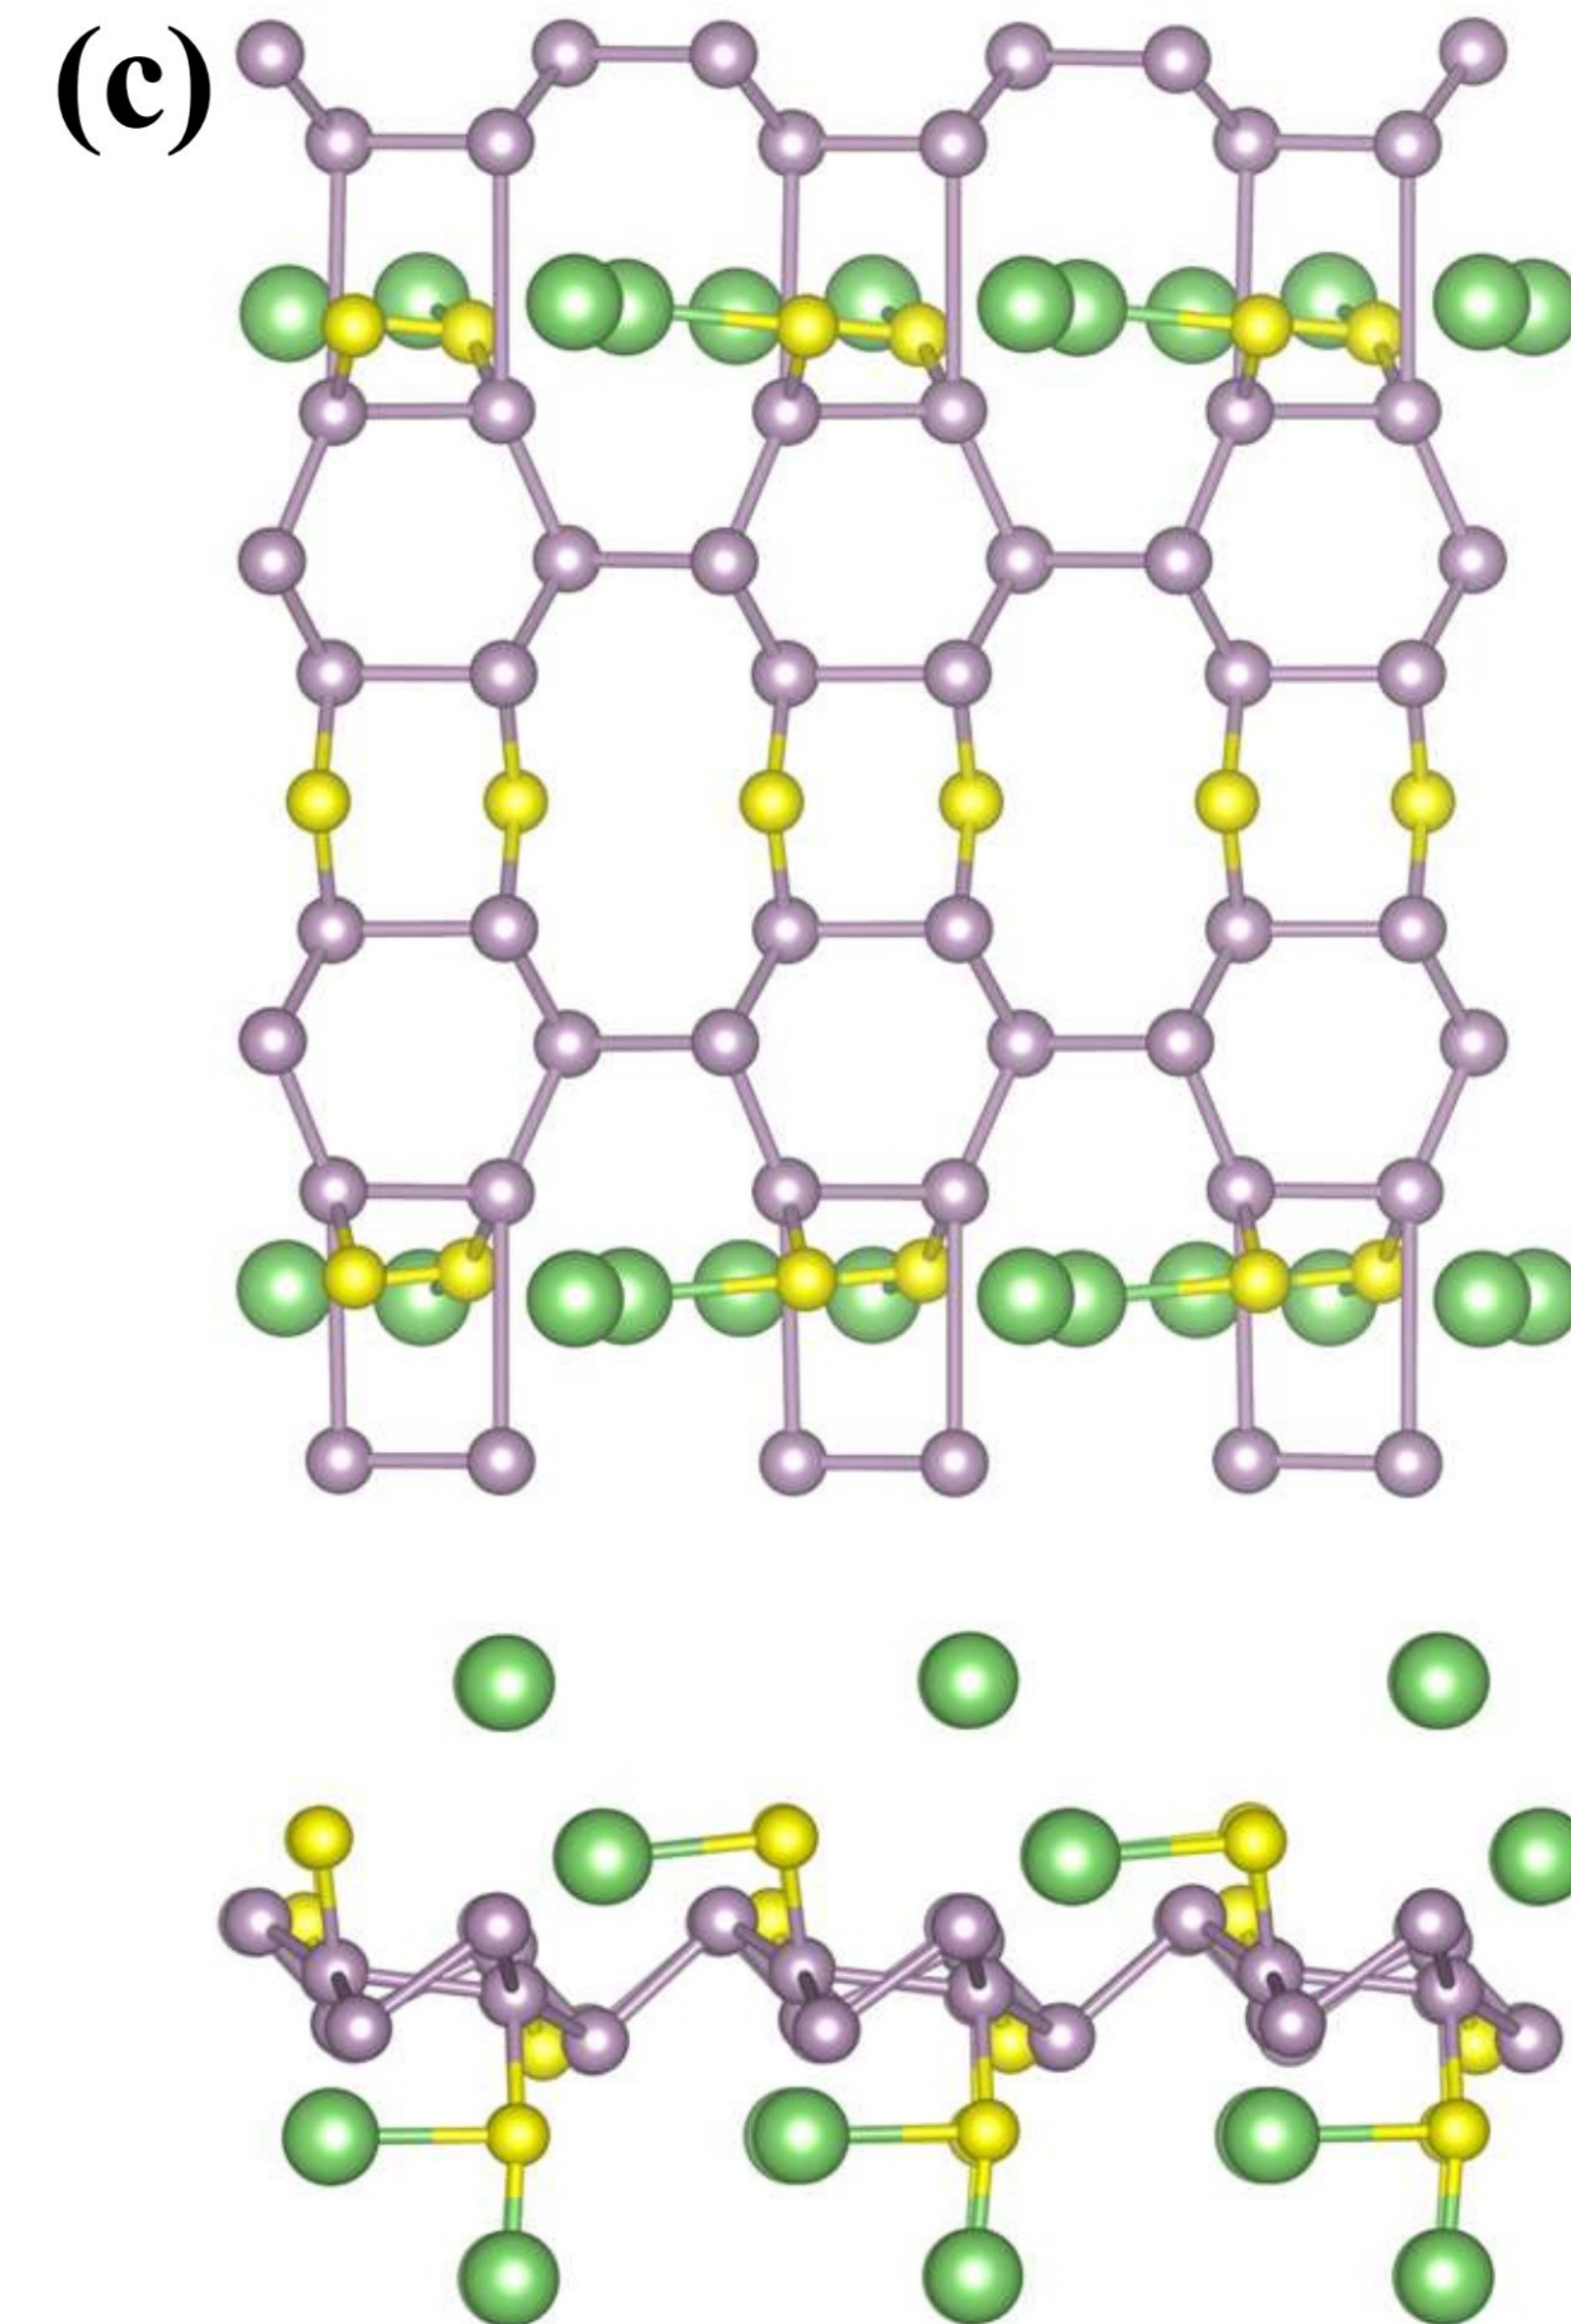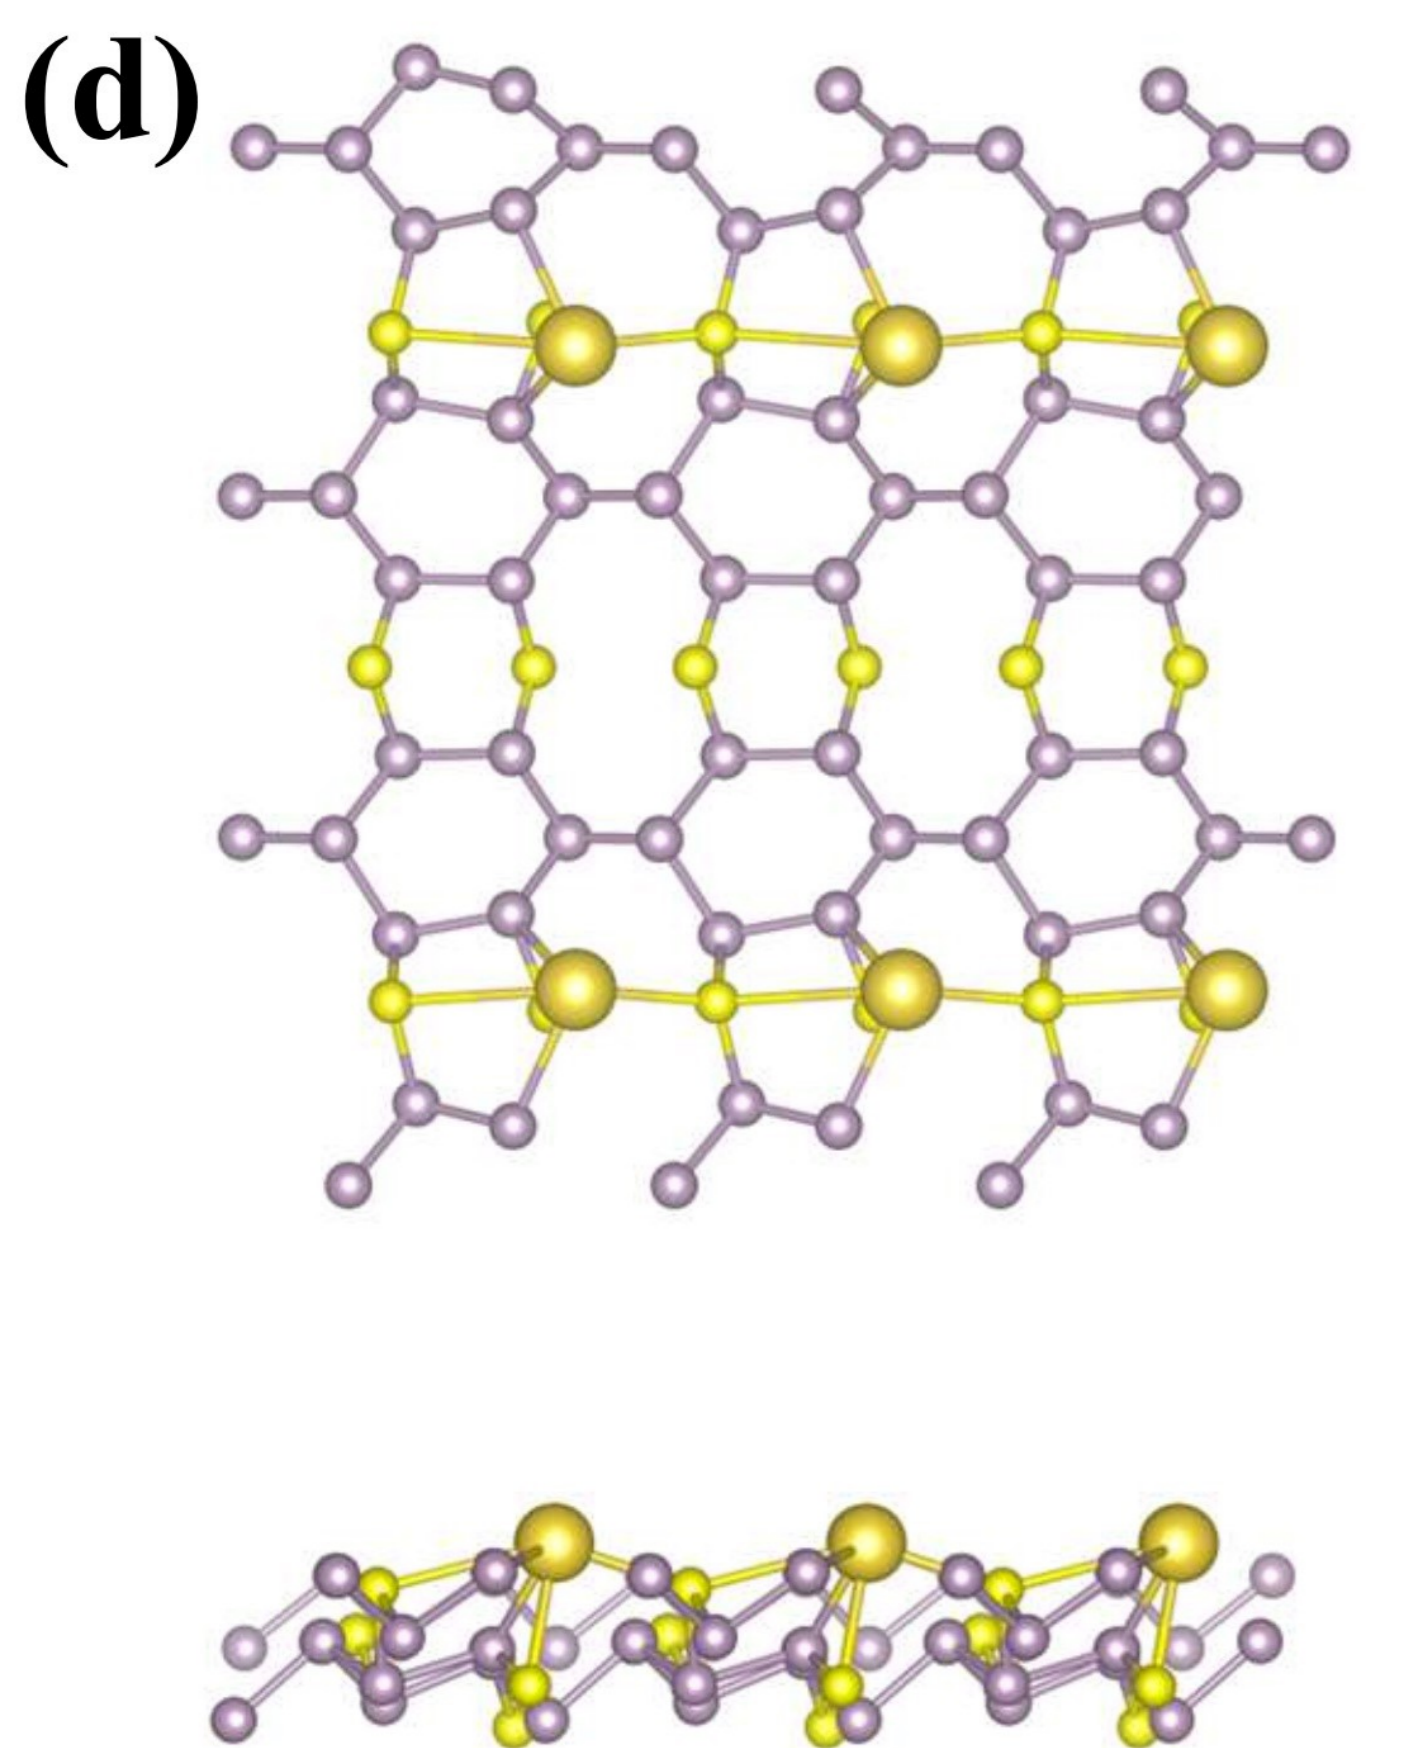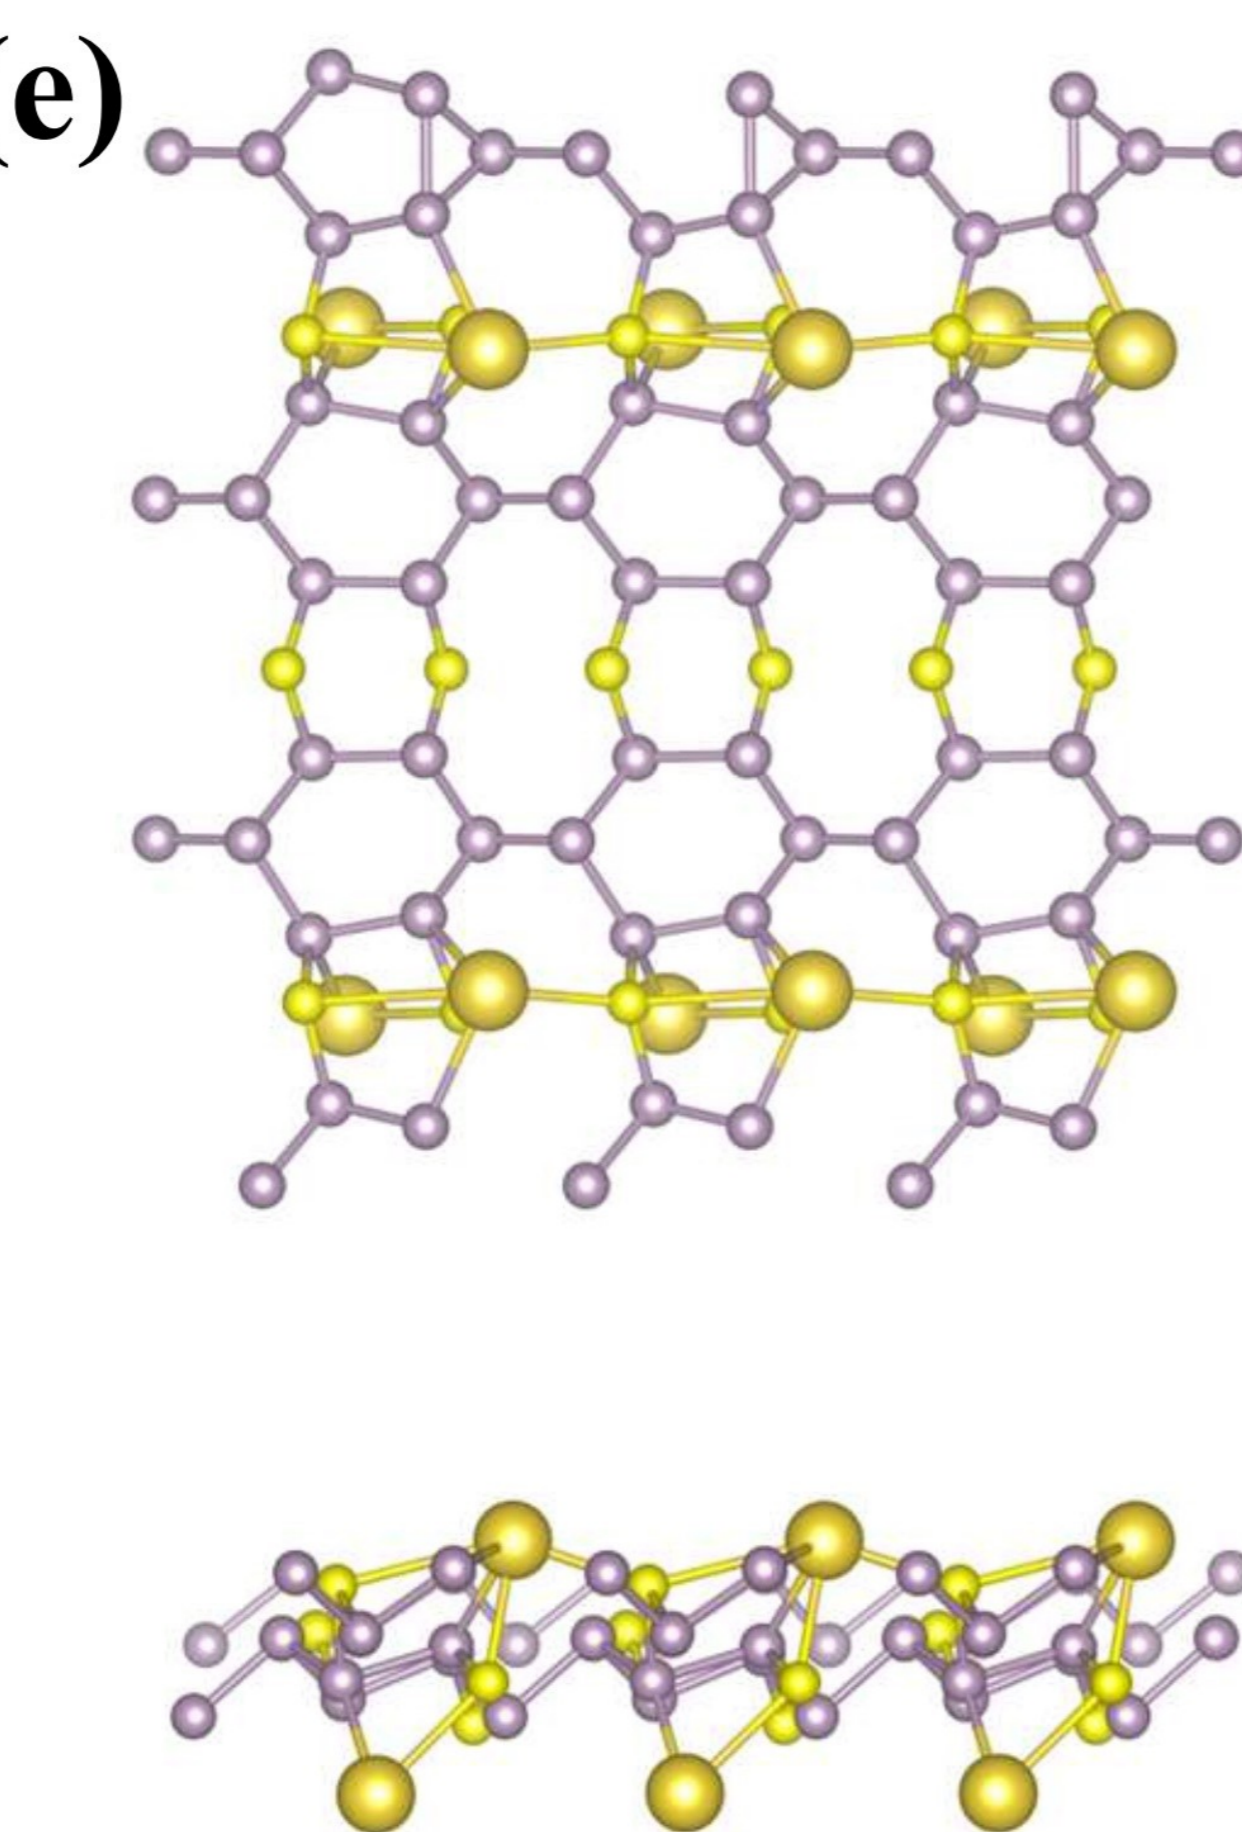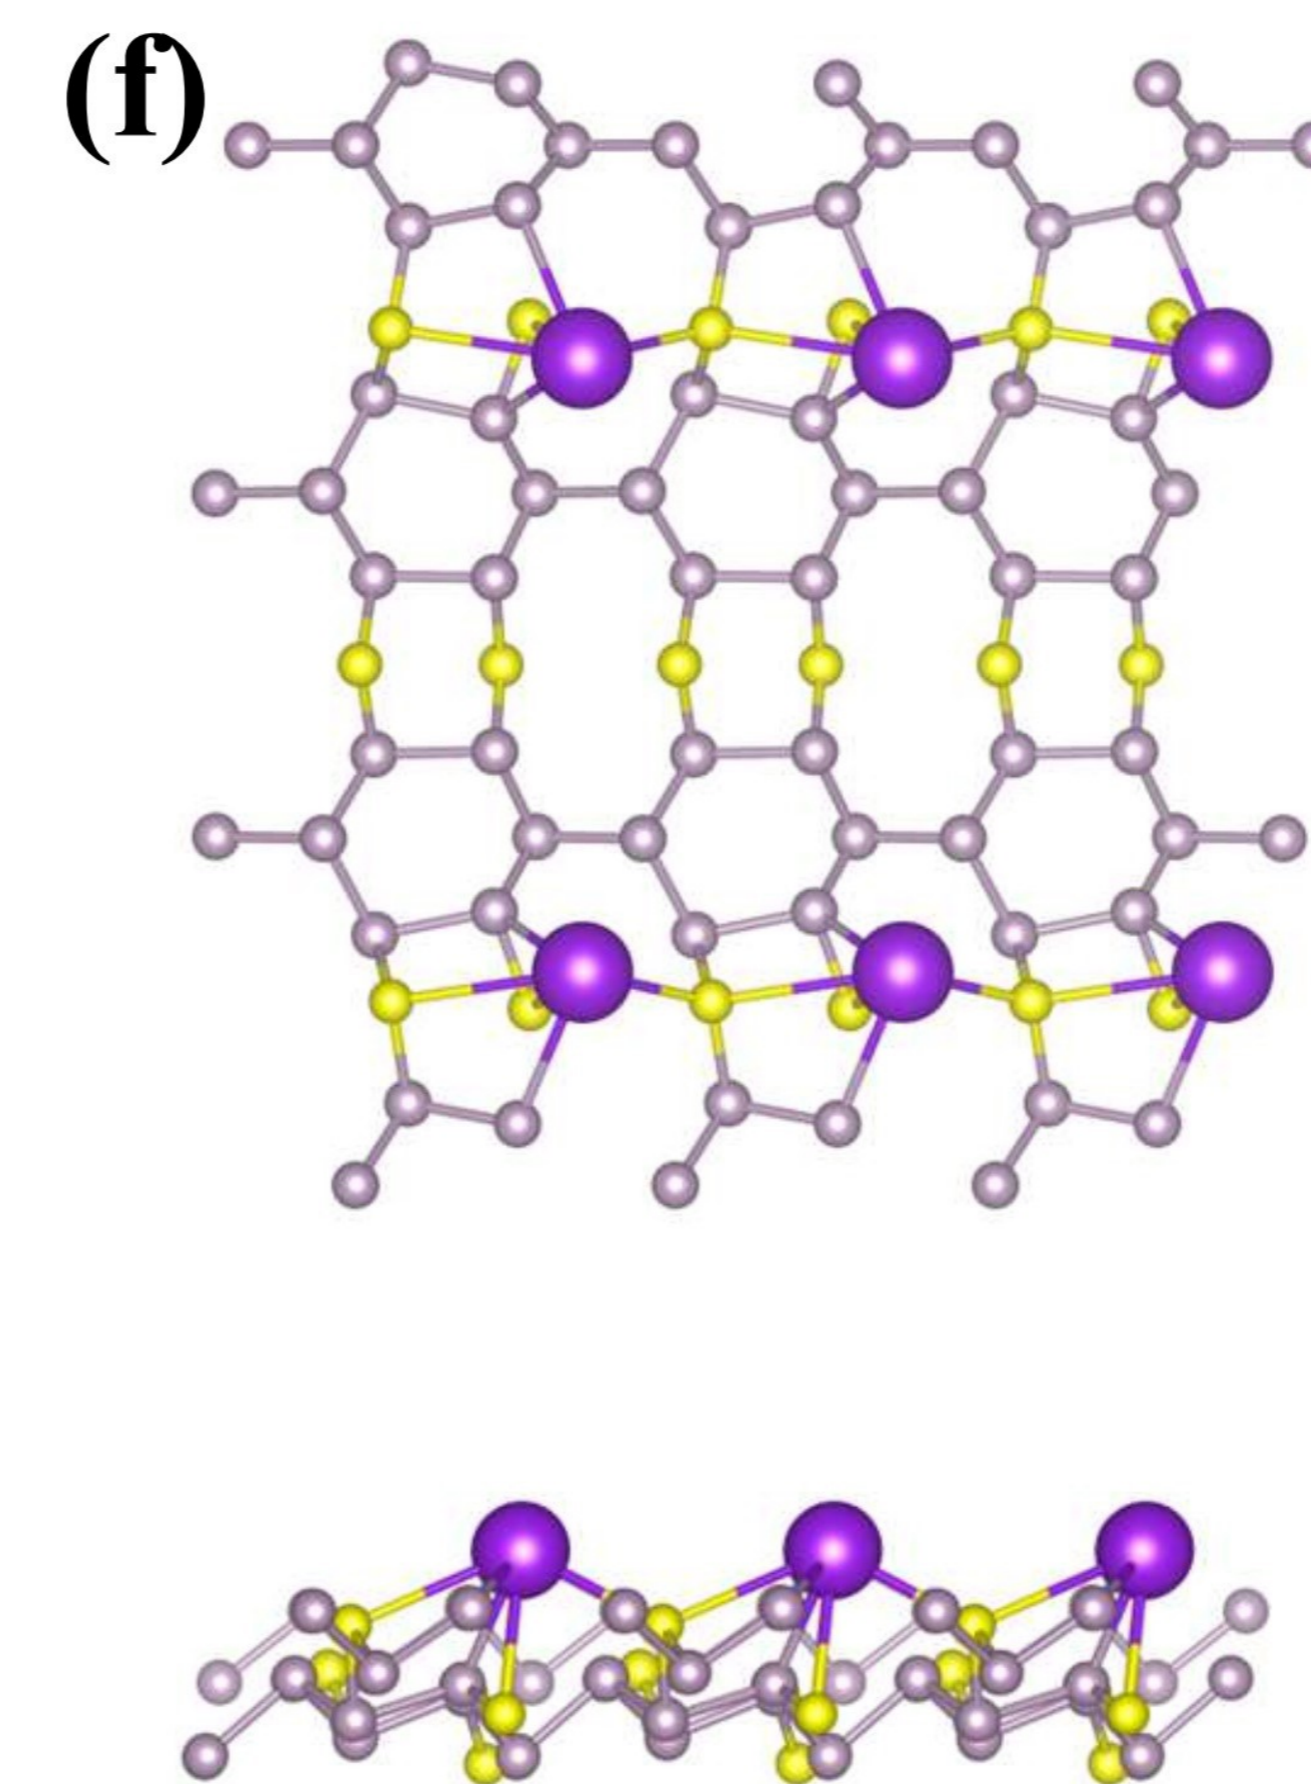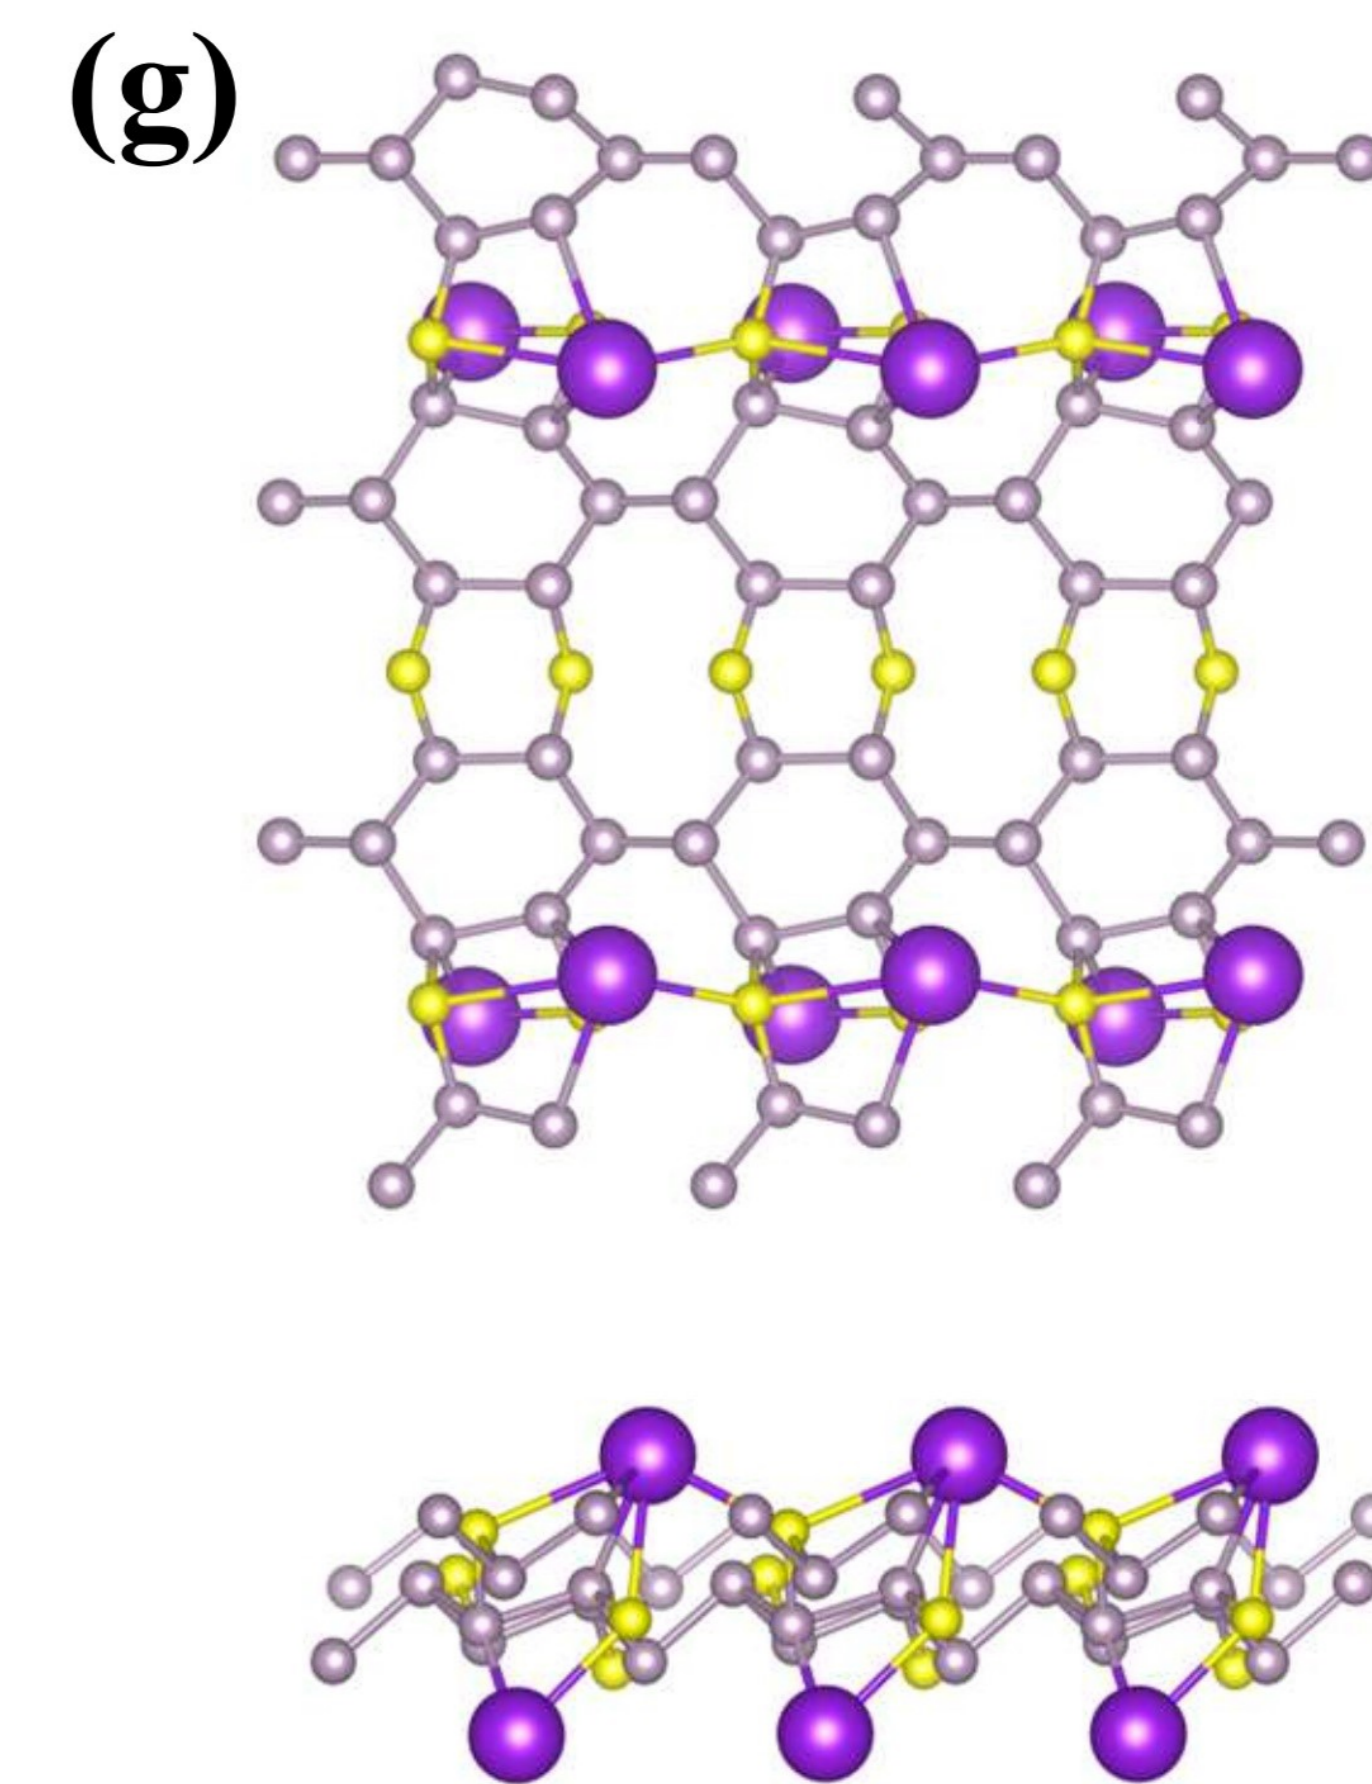

Supplement: d3cp06014d6.pdf [file d3cp06014d6.pdf]

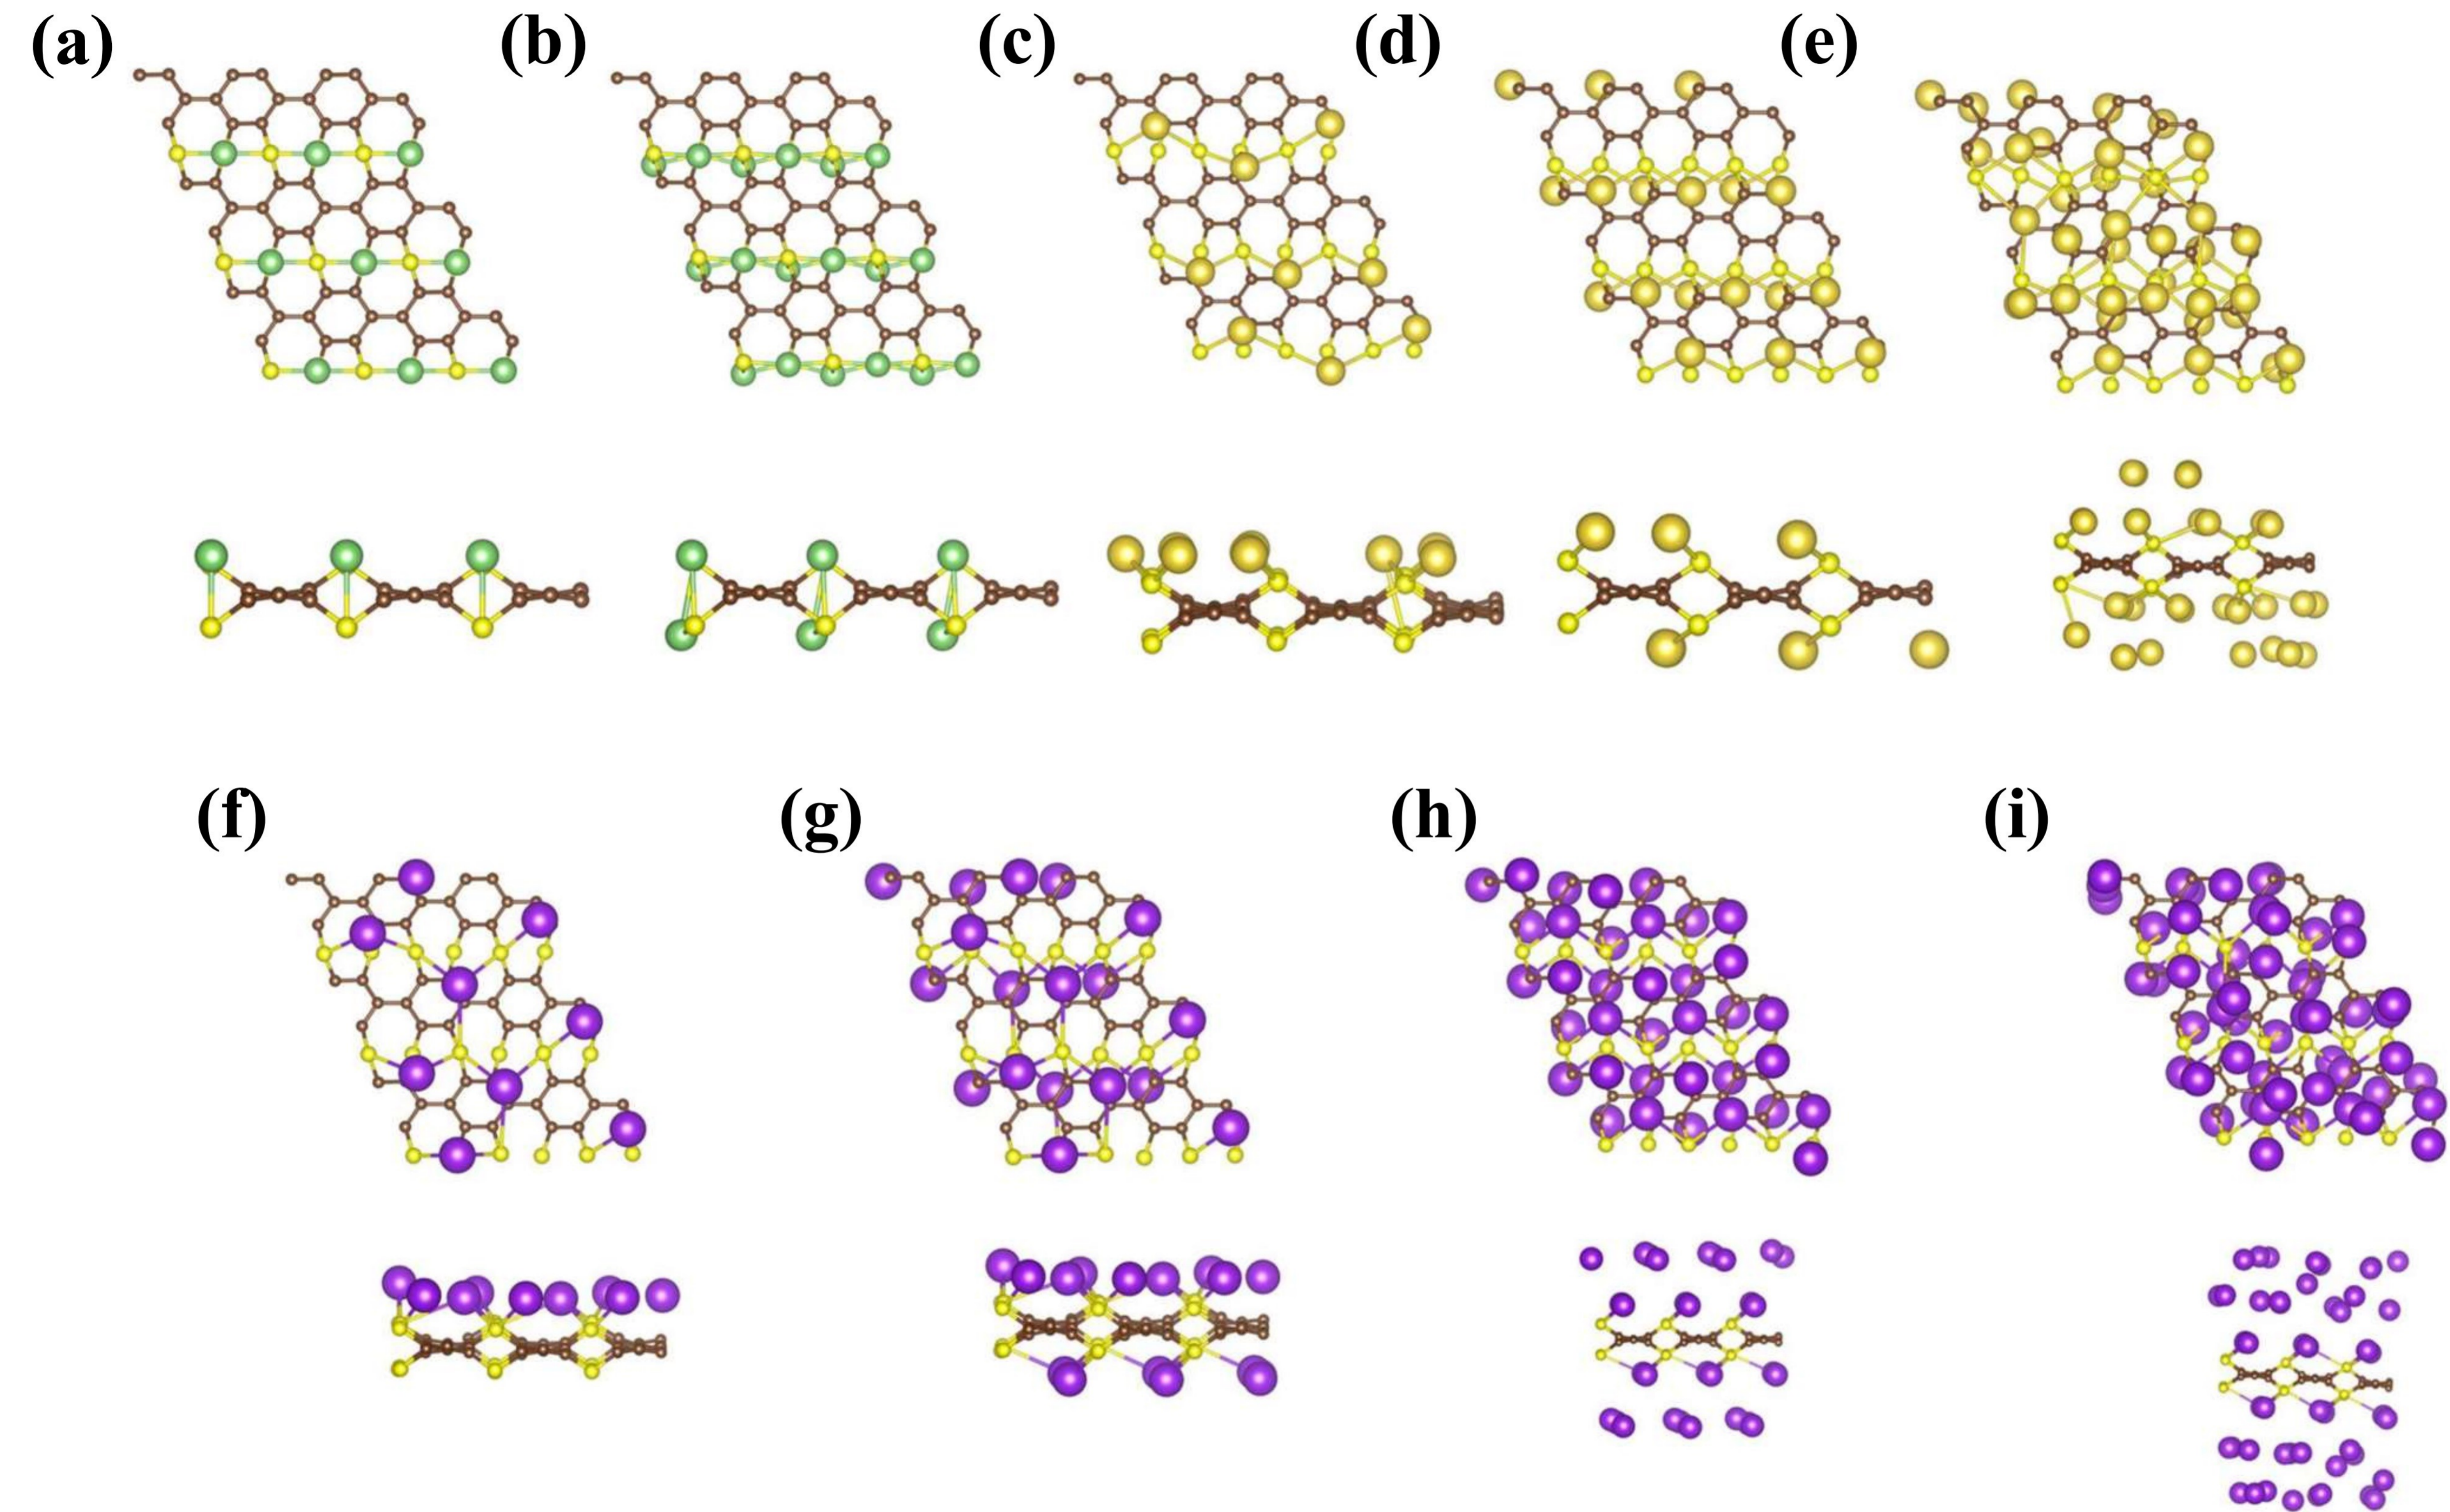

Supplement: d3cp06014d7.pdf [file d3cp06014d7.pdf]

**(a)**

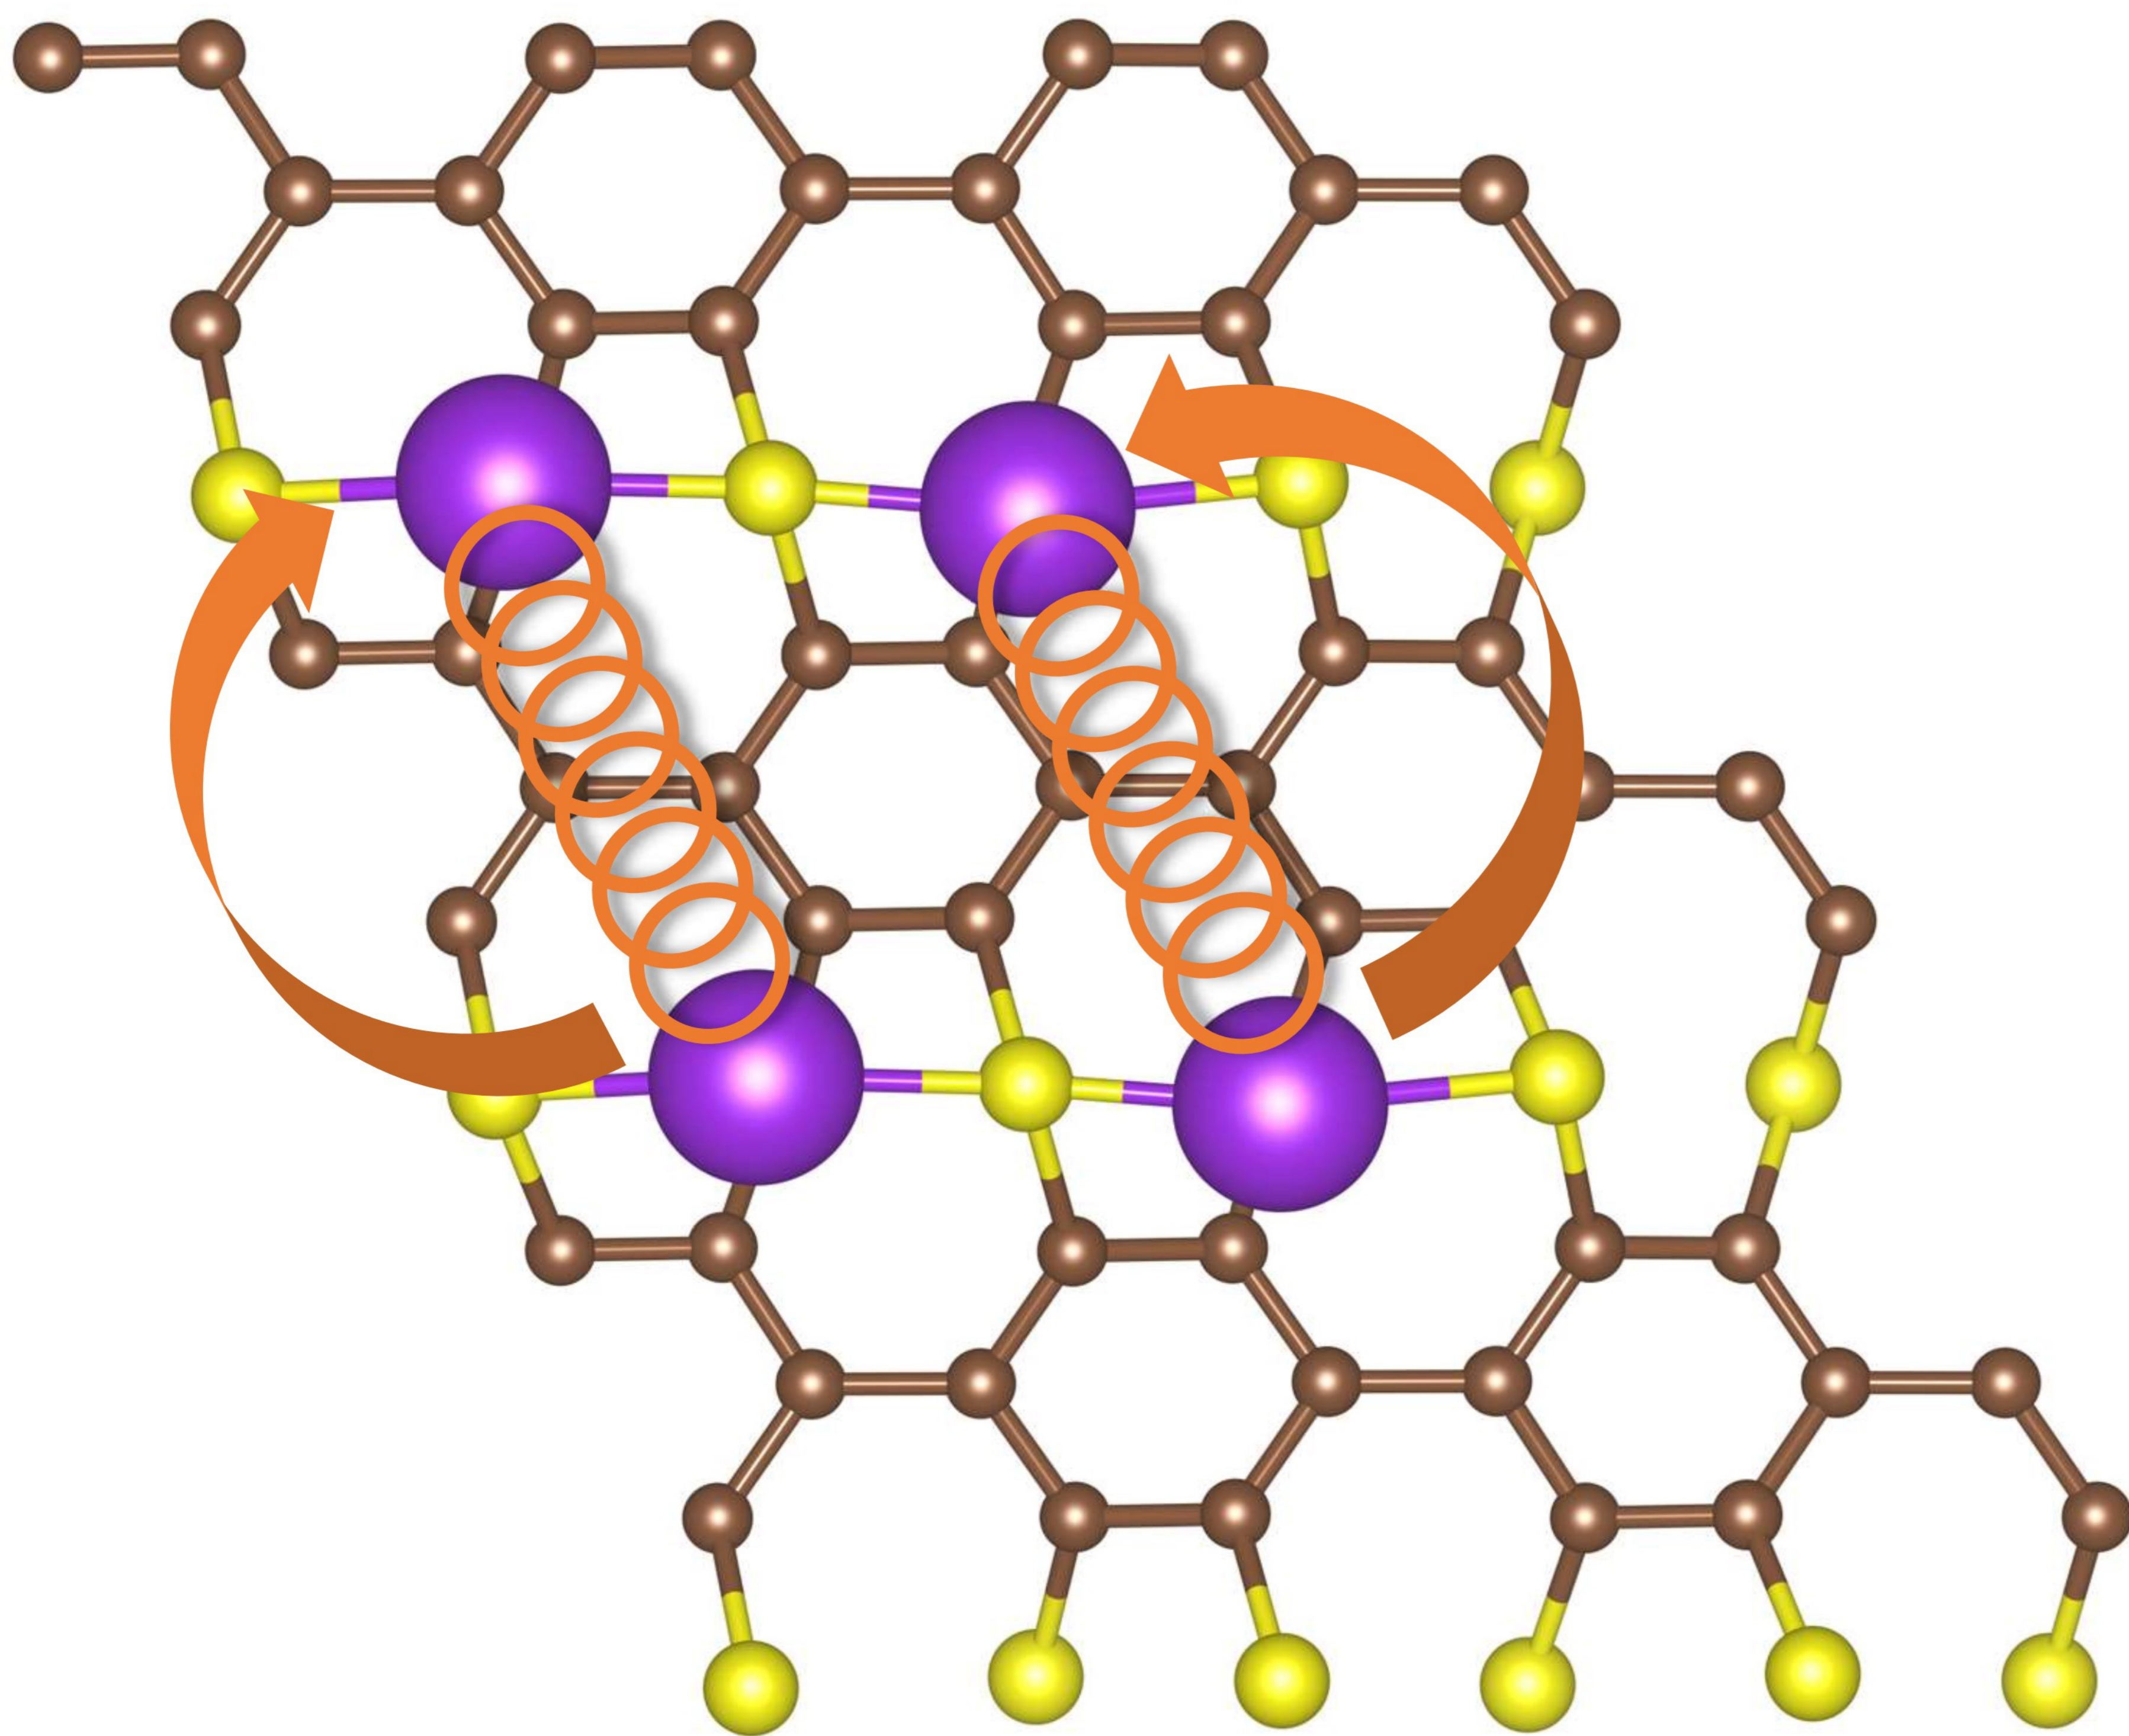

**(b)**

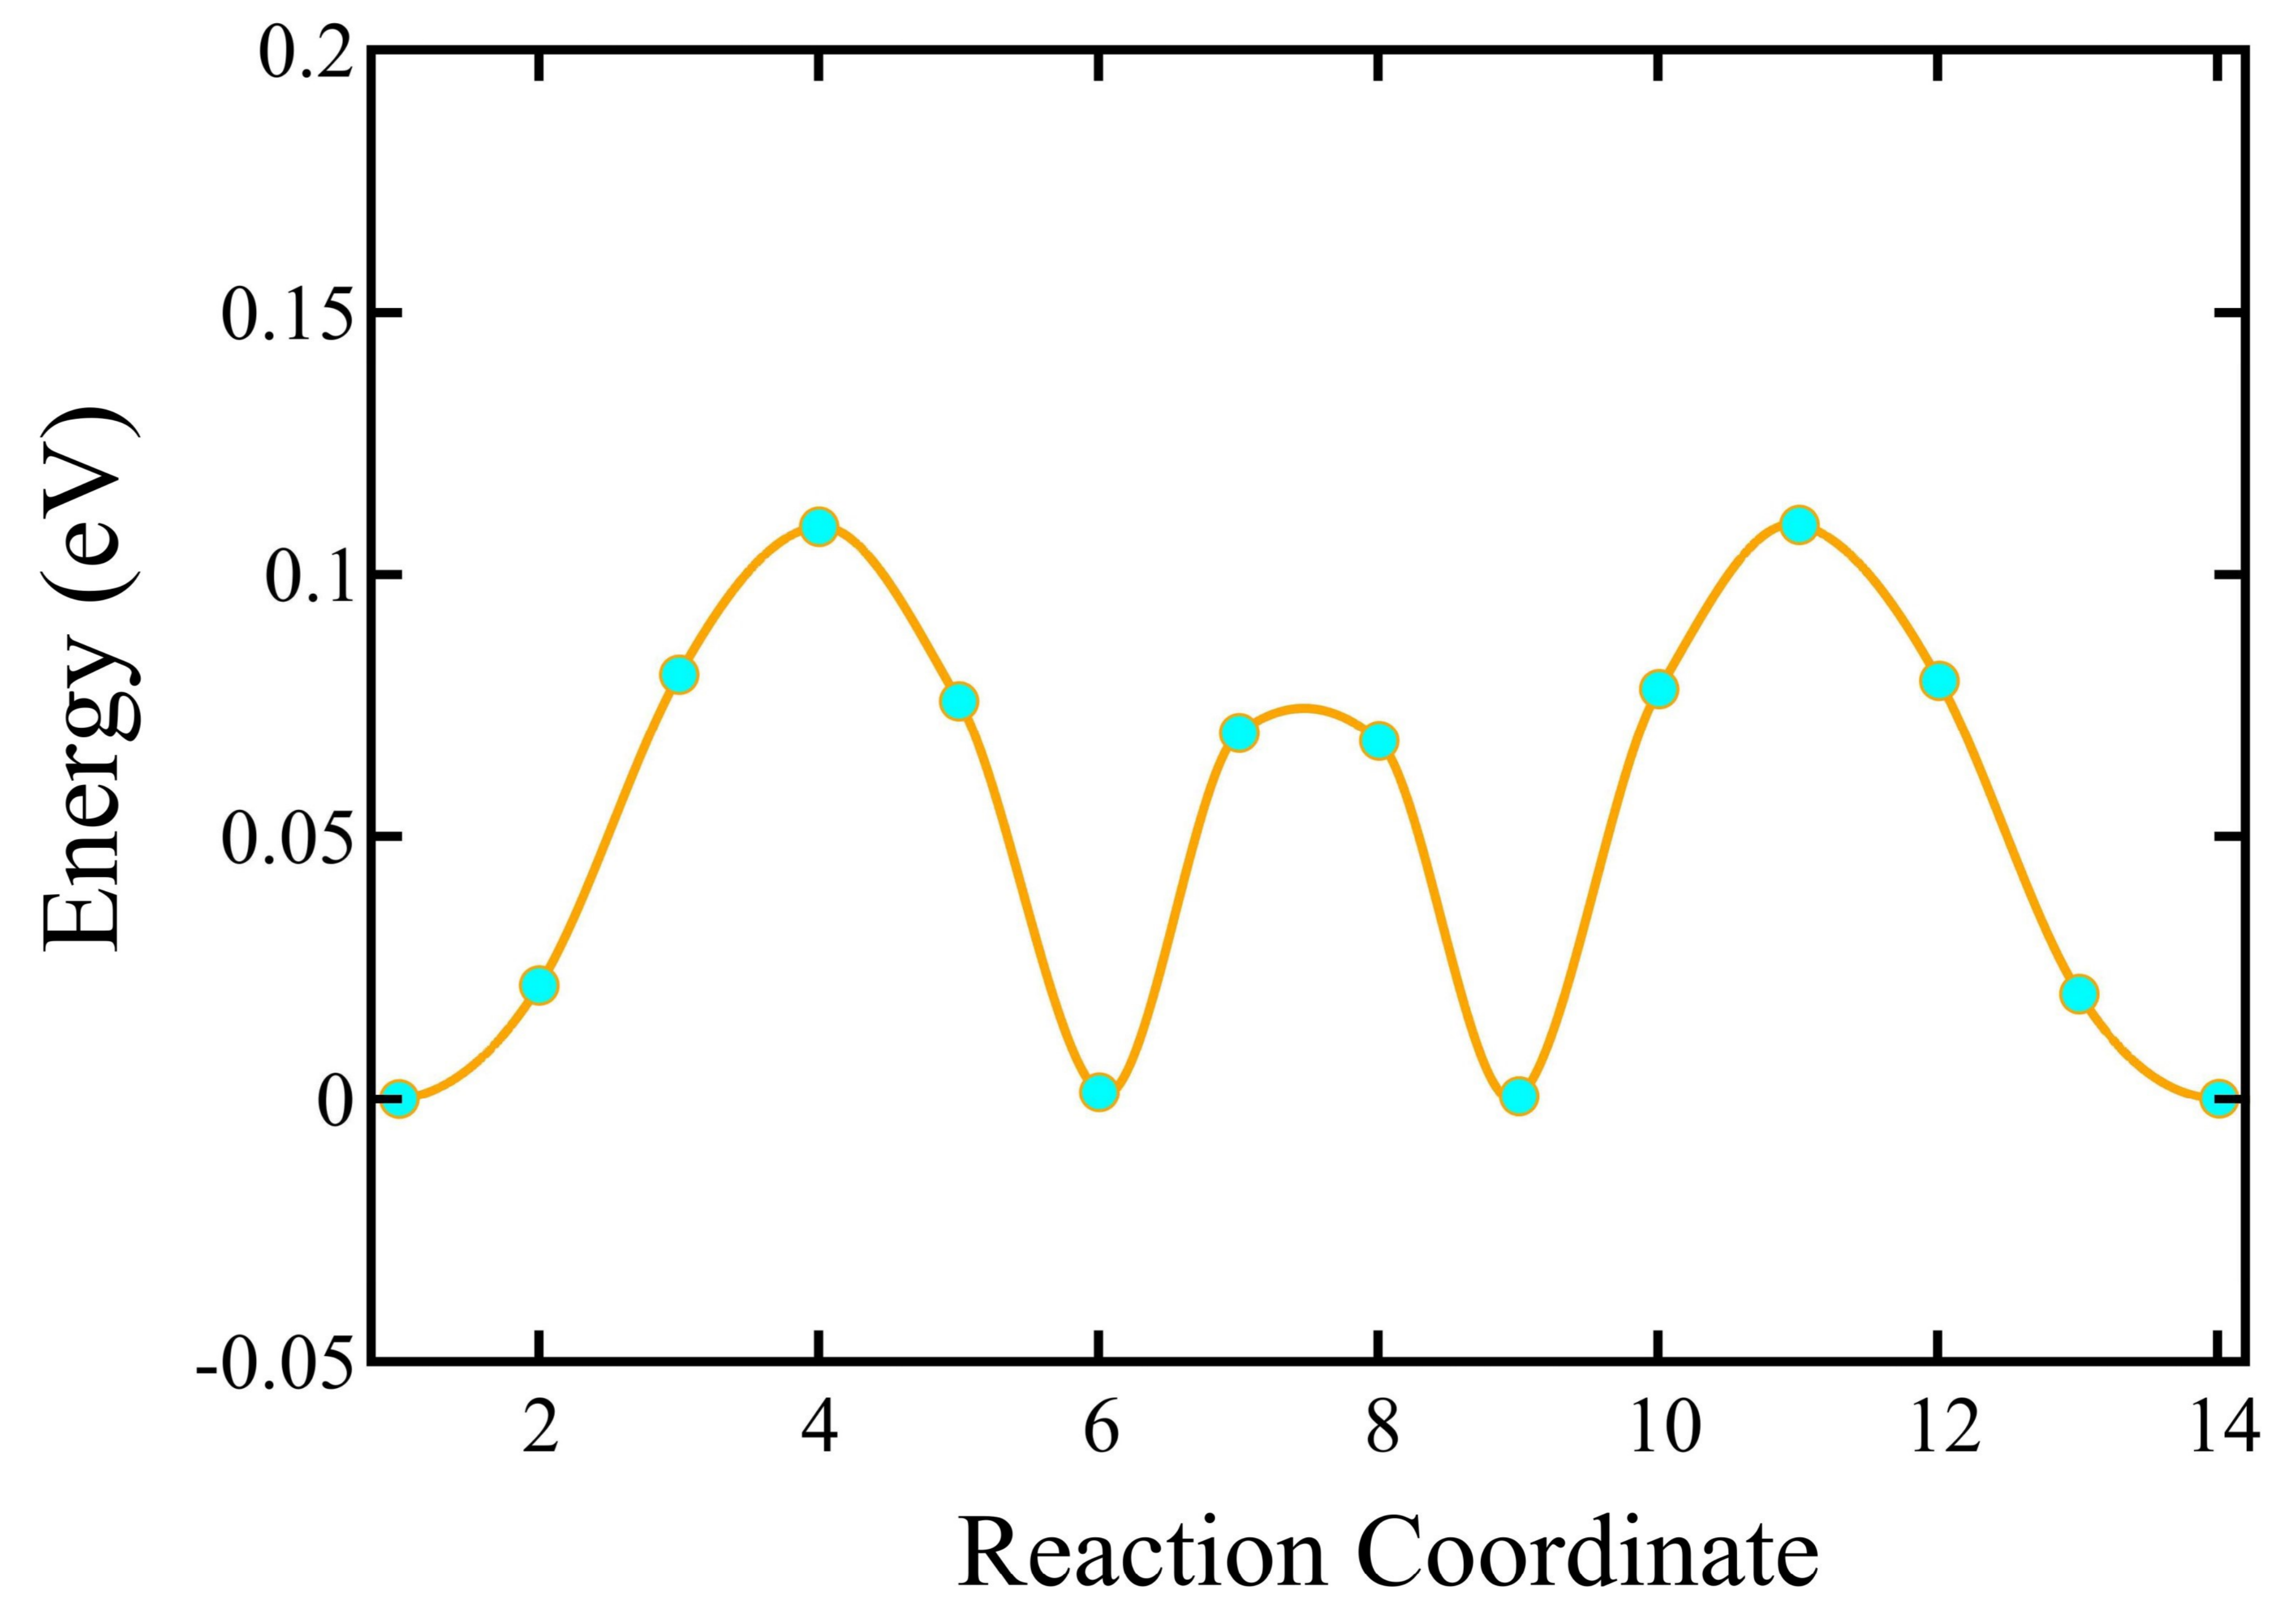

Supplement: d3cp06014d8.pdf [file d3cp06014d8.pdf]
